# Supplementary material for: C–N bond metathesis: mechanistic insight into palladium-catalyzed ring-closing using aminal species
Source: Royal Society of Chemistry journal article supplement (doi:10.1039/d2qo01638a), 2022-11-24
Supplement: d2qo01638a1.pdf [file d2qo01638a1.pdf]

## Supporting Information

### **C–N bond Metathesis: Mechanistic insight into Palladium-Catalyzed Ring-Closing Using Amino Species**

*Song Liu,<sup>\*,a,b,c</sup> Dianmin Zhang,<sup>a</sup> Min Xiao,<sup>a</sup> Chengling Pu,<sup>a</sup> Xiaoqing Zhang,<sup>a</sup> Xiuwen Yang,<sup>a</sup> Tao Zhang<sup>\*,d</sup> and Ruopeng Bai<sup>\*,b</sup>*

<sup>a</sup> Chongqing Key Laboratory of Environmental Materials and Remediation Technologies, College of Chemistry and Environmental Engineering, Chongqing University of Arts and Sciences, Chongqing, 402160, P. R. China

<sup>b</sup> School of Chemistry and Chemical Engineering, Chongqing University, Chongqing 400030, China

<sup>c</sup> Chongqing Precision Medical Industry Technology Research Institute, Chongqing 400084, P. R. China

<sup>d</sup> Zhengzhou JiShu Institute of AI Science, Zhengzhou, Henan, China 450000

## Table of Contents

1. The calculated potential energy profiles for formation of active intermediate **CP1**. Page S2
2. The calculated free energy profiles for the hydrogen transfer process from **CP6**. Page S3
3. Intrinsic reaction coordinate (IRC) calculation of transition state **TS3**. Page S4
4. Higher resolution NCI plots copies for **TS11-Si** and **TS11-Re**. Page S5
5. Completes reference for Gaussian 09. Page S5
6. Benchmarks for some frequently used calculation methods. Page S6
7. B3-LYP and M06 absolute calculation energies, enthalpies, and free energies. Page S7
8. B3-LYP geometries for all the optimized compounds and transition states. Page S9

1. The calculated potential energy profiles for formation of active intermediate **CP1**.

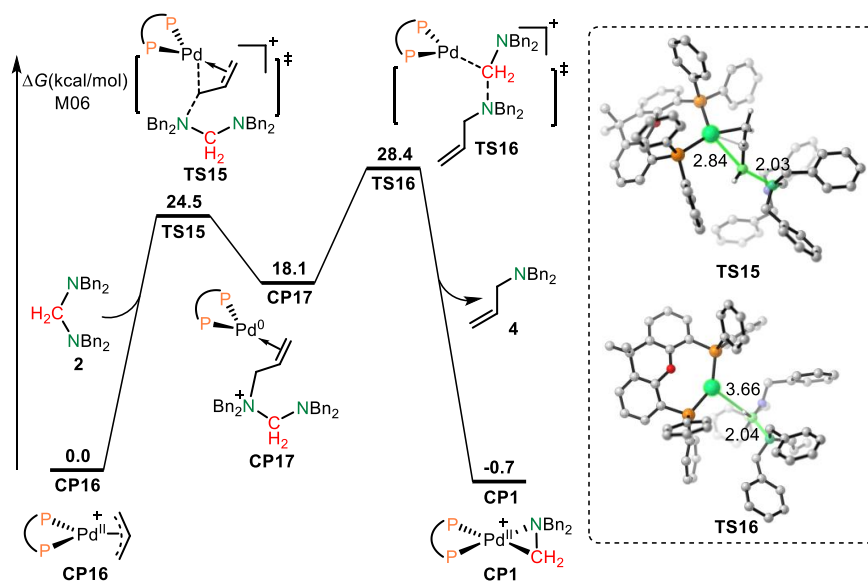

**Figure S1.** The calculated potential energy profiles for formation of active intermediate **CP1** from allyl palladium complex.

The calculated potential energy profiles for formation of active intermediate **CP1** from allyl palladium complex are shown in Figure S1. The  $S_N2$  type reductive elimination of allyl palladium complex **CP16** with aminal occurs via transition state **TS15** to form amino cation Pd(0) intermediate **CP17**. The subsequent oxidative addition of **CP17** onto the Pd(0) center occurs via transition state **TS16** with an energy barrier of 10.3 kcal/mol to generate Huang-complex (Xantphos)Pd-(CH<sub>2</sub>NBn<sub>2</sub>)<sup>+</sup> **CP1** with concomitant release of an amine. The overall activation free energy for this transformation is 28.4 kcal/mol, while the palladacycle-complex **CP1** was generated with an exothermic energy of 0.7 kcal/mol.

## 2. The calculated free energy profiles for the hydrogen transfer process from **CP6**.

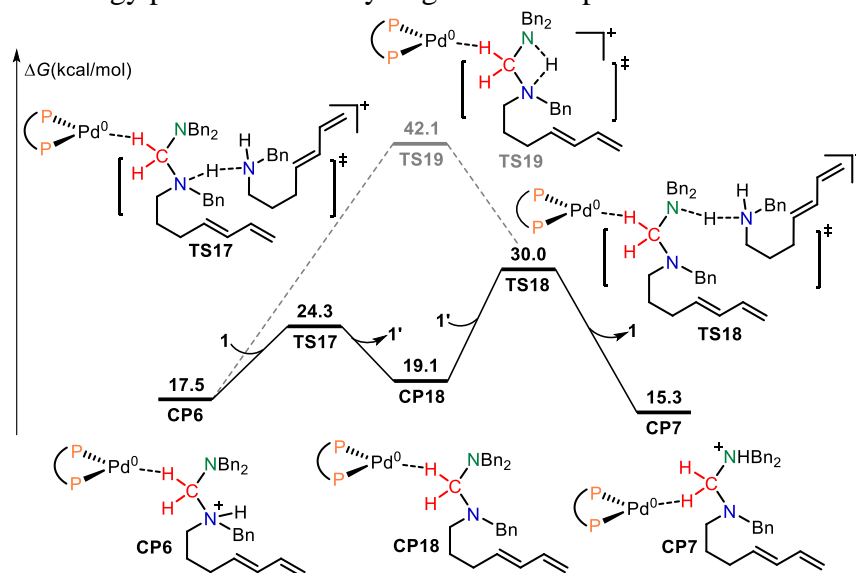

**Figure S2.** The calculated free energy profiles for the hydrogen transfer process from **CP6**.

The calculated free energy profiles for the substrate **1** promoted rapid hydrogen transfer process from **CP6** are shown in Figure S2. The intermolecular hydrogen transfer from **CP6** to substrate **1** occurs via transition state **TS17** with an energy barrier of 6.8 kcal/mol, where complex **CP18** and **1'** were generated. The following intermolecular hydrogen transfer from **1'** to the terminal amino in **CP18** gives the amino cation intermediate **CP7** via transition state **TS18** with an activation free energy of 30.0 kcal/mol. The free energy of **TS18** is 9.6 kcal/mol higher than that of **TS8**, which is indicated that substrate **1** promoted rapid hydrogen transfer process from **CP6** is unfavorable. The direct

intramolecular hydrogen transfer of **CP6** has also been calculated. The calculated results showed that the free energy of the direct intramolecular hydrogen transfer transition state **TS19** is 21.7 kcal/mol higher than that of transition state **TS8**.

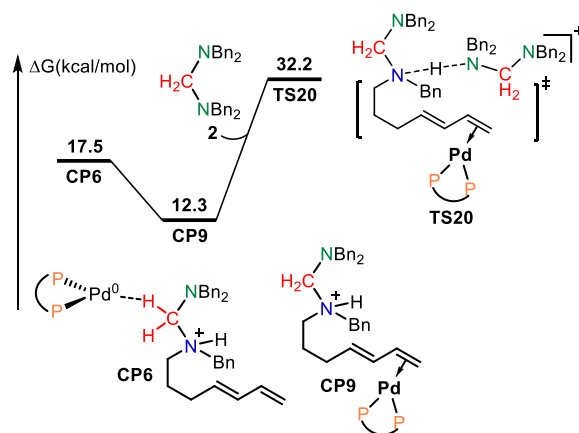

**Figure S3.** The calculated free energy profiles for the hydrogen transfer process promoted by aminal **2**.

The hydrogen transfer process promoted by aminal **2** has also been calculated. The calculated aminal **2** promoted hydrogen transfer process occurs via transition state **TS20** with a free energy barrier of 19.9 kcal/mol, which is 11.8 kcal/mol higher than that of **TS8**. The calculated results showed that this hydrogen transfer process is also unfavorable.

### 3. Intrinsic reaction coordinate (IRC) calculation of transition state **TS3**.

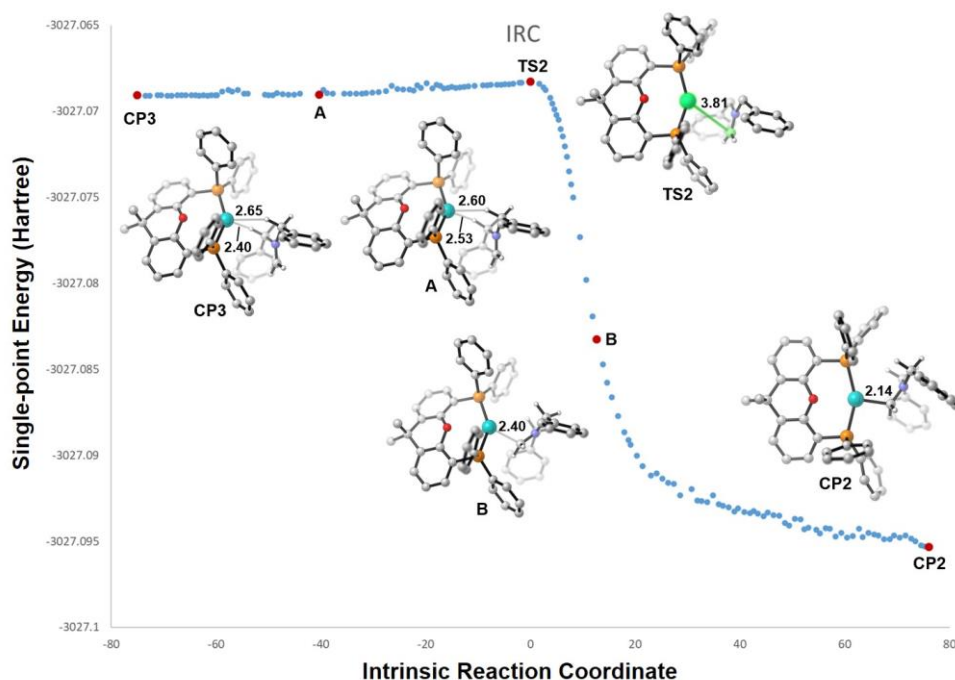

**Figure S4.** Intrinsic reaction coordinate (IRC) calculation of transition state **TS3**. The abscissa values are the IRCs; the ordinate values are the Single-point energies. The geometry information of some selected points on IRC profiles are given. The values of bond lengths are given by ångstrom. Hydrogen atoms are omitted for clarity.

We performed intrinsic reaction coordinate (IRC) calculation to further confirm which two intermediates are linked by the transition state **TS2**. The IRC calculation of transition state **TS2** clearly revealed that intermediates **CP2** and **CP3** are linked by that transition state. In **CP3**, the Pd(0) is bonded to imine cations by two hydrogen bonds.

#### 4. Higher resolution NCI plots copies for **TS11-Si** and **TS11-Re**.

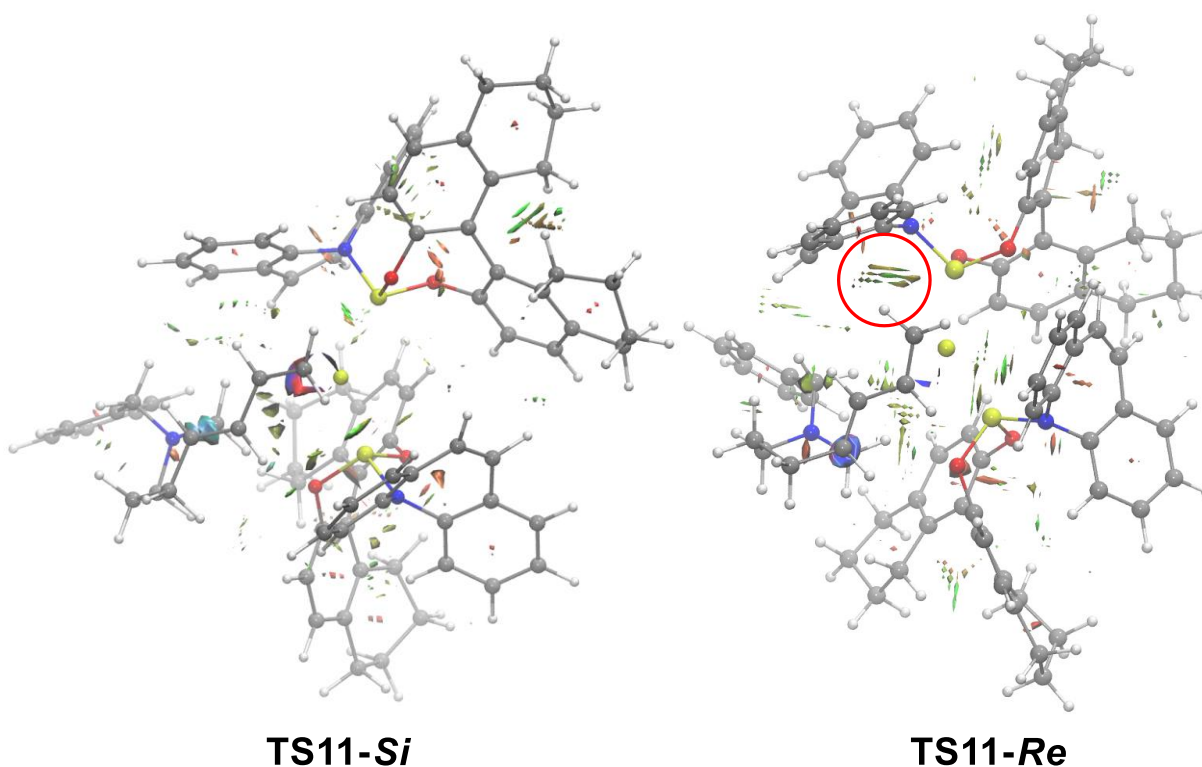

**Figure S5.** Higher resolution NCI plots copies for **TS11-Si** and **TS11-Re**.

#### 5. Complete reference for Gaussian 09

Frisch, M. J.; Trucks, G. W.; Schlegel, H. B.; Scuseria, G. E.; Robb, M. A.; Cheeseman, J. R.; Scalmani, G.; Barone, V.; Mennucci, B.; Petersson, G. A.; Nakatsuji, H.; Caricato, M.; Li, X.; Hratchian, H. P.; Izmaylov, A. F.; Bloino, J.; Zheng, G.; Sonnenberg, J. L.; Hada, M.; Ehara, M.; Toyota, K.; Fukuda, R.; Hasegawa, J.; Ishida, M.; Nakajima, T.; Honda, Y.; Kitao, O.; Nakai, H.; Vreven, T.; Montgomery, Jr., J. A.; Peralta, J. E.; Ogliaro, F.; Bearpark, M.; Heyd, J. J.; Brothers, E.; Kudin, K. N.; Staroverov, V. N.;

Keith, T.; Kobayashi, R.; Normand, J.; Raghavachari, K.; Rendell, A.; Burant, J. C.; Iyengar, S. S.; Tomasi, J.; Cossi, M.; Rega, N.; Millam, J. M.; Klene, M.; Knox, J. E.; Cross, J. B.; Bakken, V.; Adamo, C.; Jaramillo, J.; Gomperts, R.; Stratmann, R. E.; Yazyev, O.; Austin, A. J.; Cammi, R.; Pomelli, C.; Ochterski, J. W.; Martin, R. L.; Morokuma, K.; Zakrzewski, V. G.; Voth, G. A.; Salvador, P.; Dannenberg, J. J.; Dapprich, S.; Daniels, A. D.; Farkas, O.; Foresman, J. B.; Ortiz, J. V.; Cioslowski, J.; and Fox, D. J. Gaussian 09, revision D.01; Gaussian, Inc.: Wallingford, CT, 2013.

## 6. Benchmarks for some frequently used calculation methods.

We performed benchmarks for some frequently used calculation methods. The calculated results shown that the relative free energies between **CP1** and **CP2**, calculated by most methods tested, stays roughly the same. The calculated results indicated that this method used herein is reliable. Thus, a commonly used combination of computational methods, M06 with the SMD solvation model for single point calculations and B3LYP for geometry optimization, was chosen in the present study.

| Method for Geometry Optimization | Method for energy calculation | CP1 | CP2     |
|----------------------------------|-------------------------------|-----|---------|
| B3-LYP/SDD-6-31G(d)              | B3-LYP/SDD-6-311+G(d)/SMD     | 0.0 | 1.5     |
| B3-LYP/SDD-6-31G(d)              | B3-LYP-D3/SDD-6-311+G(d)/SMD  | 0.0 | 10.5    |
| B3-LYP/SDD-6-31G(d)              | M06/SDD-6-311+G(d)/SMD        | 0.0 | 10.7    |
| B3-LYP/SDD-6-31G(d)              | M06-L/SDD-6-311+G(d)/SMD      | 0.0 | 9.0     |
| B3-LYP/SDD-6-31G(d)              | M11/SDD-6-311+G(d)/SMD        | 0.0 | 15.4    |
| B3-LYP/SDD-6-31G(d)              | M11-L/SDD-6-311+G(d)/SMD      | 0.0 | 8.5     |
| B3-LYP-D3/SDD-6-31G(d)           | B3-LYP-D3/SDD-6-311+G(d)/SMD  | 0.0 | not got |
| BP86/SDD-6-31G(d)                | BP86/SDD-6-311+G(d)/SMD       | 0.0 | -0.3    |
| M06/SDD-6-31G(d)                 | M06/SDD-6-311+G(d)/SMD        | 0.0 | not got |
| M06-L/SDD-6-31G(d)               | M06-L/SDD-6-311+G(d)/SMD      | 0.0 | 12.2    |
| M11/SDD-6-31G(d)                 | M11/SDD-6-                    | 0.0 | 15.8    |

|                                     | 311+G(d)/SMD                 |     |      |
|-------------------------------------|------------------------------|-----|------|
| M11-L/SDD-6-31G(d)                  | M11-L/SDD-6-311+G(d)/SMD     | 0.0 | 12.0 |
| wB97xd/SDD-6-31G(d)                 | wB97xd/SDD-6-311+G(d)/SMD    | 0.0 | 17.3 |
| B3-LYP-D3/SDD-6-31G(d) in solvent   | B3-LYP-D3/SDD-6-311+G(d)/SMD | 0.0 | 11.5 |
| BP86/SDD-6-31G(d)/SMD in solvent    | BP86/SDD-6-311+G(d)/SMD      | 0.0 | 1.8  |
| M06/SDD-6-31G(d) /SMD in solvent    | M06 SDD-6-311+G(d)/SMD       | 0.0 | 8.9  |
| M06-L/SDD-6-31G(d) /SMD in solvent  | M06-L SDD-6-311+G(d)/SMD     | 0.0 | 10.5 |
| M11/SDD-6-31G(d) /SMD in solvent    | M11 SDD-6-311+G(d)/SMD       | 0.0 | 15.3 |
| M11-L/SDD-6-31G(d) /SMD in solvent  | M11-L SDD-6-311+G(d)/SMD     | 0.0 | 11.6 |
| wB97xd/SDD-6-31G(d) /SMD in solvent | wB97xd SDD-6-311+G(d)/SMD    | 0.0 | 18.9 |

## 7. B3-LYP and M06 absolute calculation energies, enthalpies, and free energies.

**Table S1.** B3-LYP and M06 absolute calculation energies, enthalpies, and free energies.

| Geometry        | $E_{(\text{elec-M06})}^1$ | $H_{(\text{corr-M06})}^2$ | $G_{(\text{corr-M06})}^3$ | $E_{(\text{solv-M06-L})}^4$ | IF <sup>5</sup> |
|-----------------|---------------------------|---------------------------|---------------------------|-----------------------------|-----------------|
| <b>CP1</b>      | -3027.109567              | 0.928553                  | 0.784786                  | -3025.981620                | -               |
| <b>TS1</b>      | -3027.095707              | 0.927005                  | 0.779600                  | -3025.958443                | -90.9           |
| <b>CP2</b>      | -3027.098831              | 0.928026                  | 0.778727                  | -3025.958569                | -               |
| <b>TS2</b>      | -3027.068278              | 0.926896                  | 0.777279                  | -3025.937679                | -41.1           |
| <b>CP3</b>      | -3027.069124              | 0.927442                  | 0.776498                  | -3025.938967                | -               |
| <b>CP4</b>      | -635.730059               | 0.289290                  | 0.231355                  | -635.446527                 | -               |
| Pd <sup>0</sup> | -2391.306824              | 0.636487                  | 0.523833                  | -2390.466712                | -               |
| <b>1</b>        | -599.628510               | 0.315521                  | 0.253209                  | -599.303820                 | -               |
| <b>TS3</b>      | -1235.373261              | 0.606118                  | 0.505437                  | -1234.759633                | -39.2           |
| <b>CP5</b>      | -1235.386170              | 0.609965                  | 0.514058                  | -1234.784787                | -               |

---

|                   |              |          |          |              |         |
|-------------------|--------------|----------|----------|--------------|---------|
| <b>TS4</b>        | -3626.705176 | 1.244916 | 1.052061 | -3625.252259 | -25.2   |
| <b>CP6</b>        | -3626.721577 | 1.247660 | 1.059509 | -3625.279144 | -       |
| <b>TS5</b>        | -3626.713659 | 1.246048 | 1.054247 | -3625.263658 | -64.9   |
| <b>CP7</b>        | -3626.716524 | 1.248384 | 1.056380 | -3625.279381 | -       |
| <b>TS6</b>        | -3626.715787 | 1.246490 | 1.055064 | -3625.267183 | -99.5   |
| <b>CP8</b>        | -3029.484080 | 0.973552 | 0.820365 | -3028.339957 | -       |
| HNBn <sub>2</sub> | -597.248356  | 0.269956 | 0.214043 | -596.939236  | -       |
| <b>CP9</b>        | -3626.726338 | 1.248158 | 1.061985 | -3625.289811 | -       |
| <b>TS7</b>        | -4226.365413 | 1.561689 | 1.335213 | -4224.608744 | -1154.6 |
| <b>1'</b>         | -600.014918  | 0.330869 | 0.267844 | -599.757196  | -       |
| <b>CP10</b>       | -3626.315871 | 1.233216 | 1.044416 | -3624.842235 | -       |
| <b>TS8</b>        | -4226.362144 | 1.562002 | 1.337628 | -4224.603229 | -1151.3 |
| <b>CP11</b>       | -3626.723419 | 1.248119 | 1.060761 | -3625.292000 | -       |
| <b>TS9</b>        | -3626.686929 | 1.242701 | 1.057866 | -3625.246886 | -1673.3 |
| <b>CP12</b>       | -3029.458439 | 0.973226 | 0.822966 | -3028.329313 | -       |
| <b>TS10</b>       | -3029.422595 | 0.972255 | 0.822925 | -3028.294287 | -227.0  |
| <b>CP13</b>       | -3029.448288 | 0.973653 | 0.824652 | -3028.321895 | -       |
| <b>TS11</b>       | -3029.445793 | 0.972467 | 0.825014 | -3028.323091 | -51.1   |
| <b>CP14</b>       | -3029.491779 | 0.974996 | 0.827157 | -3028.358698 | -       |
| <b>TS12</b>       | -3029.403559 | 0.971874 | 0.824372 | -3028.269555 | -328.3  |
| <b>TS13</b>       | -4262.062292 | 1.527553 | 1.316754 | -4260.317570 | -254.5  |
| <b>CP15</b>       | -4262.064778 | 1.529579 | 1.319302 | -4260.325776 | -       |
| <b>TS14</b>       | -4262.075937 | 1.527672 | 1.30936  | -4260.311599 | -58.7   |
| <b>3</b>          | -1235.001352 | 0.596480 | 0.503187 | -1234.357240 | -       |
| <b>TS11-Si</b>    | -4486.660755 | 1.520162 | 1.314645 | -4484.903353 | -52.0   |
| <b>TS11-Re</b>    | -4486.657888 | 1.520809 | 1.318718 | -4484.903796 | -129.7  |
| <b>CP16</b>       | -2508.447768 | 0.713898 | 0.595662 | -2507.577740 | -       |
| <b>TS15</b>       | -3741.037656 | 1.265963 | 1.079310 | -3739.533856 | -207.1  |
| <b>2</b>          | -1232.605325 | 0.549145 | 0.458391 | -1231.969940 | -       |
| <b>CP17</b>       | -3741.044161 | 1.268467 | 1.084219 | -3739.548940 | -       |

---



|             |              |          |          |              |         |
|-------------|--------------|----------|----------|--------------|---------|
| <b>TS16</b> | -3741.019842 | 1.266795 | 1.073457 | -3739.521770 | -41.1   |
| <b>4</b>    | -713.947944  | 0.334927 | 0.271212 | -713.569076  | -       |
| <b>TS17</b> | -4226.344933 | 1.562357 | 1.332527 | -4224.591853 | -1021.2 |
| <b>CP18</b> | -3626.300036 | 1.233215 | 1.040127 | -3624.818341 | -       |
| <b>TS18</b> | -4226.341208 | 1.562735 | 1.333738 | -4224.584049 | -1209.1 |
| <b>TS19</b> | -3626.676775 | 1.243425 | 1.054147 | -3625.234543 | -1688.2 |
| <b>TS20</b> | -4859.319397 | 1.795948 | 1.547085 | -4857.254753 | -1375.0 |

<sup>1</sup>The electronic energy calculated by B3-LYP. <sup>2</sup>The thermal correction to enthalpy calculated by B3-LYP. <sup>3</sup>The thermal correction to Gibbs free energy calculated by B3-LYP. <sup>4</sup>The electronic energy calculated by M06 in dichloroethane solvent. <sup>5</sup>The B3-LYP calculated imaginary frequencies for the transition states.

## 8. B3-LYP geometries for all the optimized compounds and transition states.

### CP1

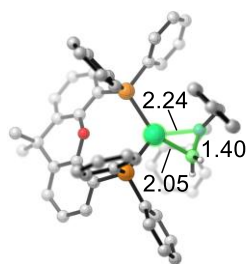

|    |             |             |             |   |             |             |             |
|----|-------------|-------------|-------------|---|-------------|-------------|-------------|
| Pd | 0.79949600  | 0.39353300  | 0.47252500  | C | 3.37085800  | -4.47075500 | 2.73819000  |
| P  | 0.33084200  | -2.03500600 | 0.16563600  | C | 3.42505700  | -4.54594500 | 1.34664000  |
| P  | -0.65560300 | 1.69712200  | -0.86929000 | C | 2.49402300  | -3.85598500 | 0.56394400  |
| O  | -2.16315700 | -0.88024600 | -0.63811900 | C | -0.50037700 | 3.50072400  | -0.48569800 |
| N  | 2.43920600  | 0.82469500  | 1.93245000  | C | -0.74307300 | 3.92016400  | 0.83541100  |
| C  | -1.33177900 | -2.65858600 | 0.66881600  | C | -0.64347400 | 5.26680500  | 1.18121300  |
| C  | -1.57706300 | -3.77637800 | 1.47820400  | C | -0.28894400 | 6.21513300  | 0.21684500  |
| C  | -2.88682300 | -4.13944900 | 1.79394100  | C | -0.04481400 | 5.80825000  | -1.09438800 |
| C  | -3.96658400 | -3.40894400 | 1.29389000  | C | -0.15402000 | 4.45936400  | -1.44771000 |
| C  | -3.76611200 | -2.30281500 | 0.45968500  | C | -0.27564600 | 1.58763100  | -2.66840800 |
| C  | -2.44156000 | -1.95764100 | 0.17783900  | C | -1.27484100 | 1.47428200  | -3.64488400 |
| C  | -4.88192000 | -1.50551200 | -0.22881200 | C | -0.93410600 | 1.41201700  | -4.99840700 |
| C  | -4.40186400 | -0.05286900 | -0.36513000 | C | 0.40348200  | 1.47499900  | -5.39065600 |
| C  | -3.03705700 | 0.18201500  | -0.57729700 | C | 1.40599100  | 1.59184000  | -4.42349600 |
| C  | -2.48724200 | 1.46238300  | -0.73904800 | C | 1.07049900  | 1.63788700  | -3.07047400 |
| C  | -3.37760400 | 2.54888600  | -0.75080300 | C | 1.91201000  | 1.92973000  | 1.25247500  |
| C  | -4.74303600 | 2.34777500  | -0.56270800 | C | 2.12677200  | 0.64109600  | 3.39130000  |
| C  | -5.24561200 | 1.06219000  | -0.35508900 | C | 0.81369500  | 1.21989800  | 3.86156100  |
| C  | -5.08838900 | -2.09029900 | -1.65646200 | C | -0.39961600 | 0.54615400  | 3.65697700  |
| C  | -6.21064700 | -1.59896100 | 0.54225700  | C | -1.60190600 | 1.09363100  | 4.10739500  |
| C  | 0.50178900  | -2.70515200 | -1.54314500 | C | -1.60694700 | 2.32094800  | 4.77605300  |
| C  | 0.02936300  | -3.98494300 | -1.88060100 | C | -0.40421600 | 2.99574700  | 4.99463200  |
| C  | 0.18529200  | -4.47362200 | -3.17712500 | C | 0.79661900  | 2.44646400  | 4.53973500  |
| C  | 0.80850100  | -3.69005400 | -4.15290700 | C | 3.84208600  | 0.36180600  | 1.65346900  |
| C  | 1.27439500  | -2.41597800 | -3.82748600 | C | 4.32148600  | 0.52165700  | 0.23232500  |
| C  | 1.12198900  | -1.92572000 | -2.52810500 | C | 4.12489600  | -0.50096000 | -0.70519400 |
| C  | 1.49796300  | -3.07003800 | 1.16351400  | C | 4.59310200  | -0.36478900 | -2.01331800 |
| C  | 1.45565200  | -3.00051400 | 2.56885700  | C | 5.26665200  | 0.79696900  | -2.39852200 |
| C  | 2.37715200  | -3.69982300 | 3.34874300  | C | 5.47732600  | 1.81863300  | -1.46901800 |
|    |             |             |             | C | 5.01109800  | 1.67792000  | -0.16074100 |
|    |             |             |             | H | -0.74855000 | -4.35668100 | 1.86959500  |
|    |             |             |             | H | -3.06835800 | -5.00234100 | 2.42764100  |
|    |             |             |             | H | -4.97382400 | -3.71911000 | 1.54964400  |
|    |             |             |             | H | -2.99966300 | 3.55512500  | -0.88944800 |
|    |             |             |             | H | -5.41893700 | 3.19744000  | -0.56976400 |
|    |             |             |             | H | -6.31062400 | 0.93359500  | -0.19569100 |
|    |             |             |             | H | -5.40636400 | -3.13701800 | -1.59549600 |
|    |             |             |             | H | -5.85984100 | -1.52385200 | -2.18982100 |
|    |             |             |             | H | -4.16506400 | -2.04745500 | -2.24259300 |

|   |             |             |             |
|---|-------------|-------------|-------------|
| H | -6.12408700 | -1.19313900 | 1.55574100  |
| H | -7.00346900 | -1.05679800 | 0.01921100  |
| H | -6.54534400 | -2.63785700 | 0.61305300  |
| H | -0.46427200 | -4.59913100 | -1.13311800 |
| H | -0.18334600 | -5.46450000 | -3.42711100 |
| H | 0.92332300  | -4.07127800 | -5.16371800 |
| H | 1.74273900  | -1.79315700 | -4.58425700 |
| H | 1.47335500  | -0.92949100 | -2.28269700 |
| H | 0.68299400  | -2.41600300 | 3.06130100  |
| H | 2.31579500  | -3.64736900 | 4.43243700  |
| H | 4.09041000  | -5.01333200 | 3.34435200  |
| H | 4.18721000  | -5.15027000 | 0.86272800  |
| H | 2.54105900  | -3.94102200 | -0.51676700 |
| H | -1.02265000 | 3.19343200  | 1.59458900  |
| H | -0.84019100 | 5.57410500  | 2.20453800  |
| H | -0.20749200 | 7.26403100  | 0.48721400  |
| H | 0.22421400  | 6.53935200  | -1.85159000 |
| H | 0.02507400  | 4.16249500  | -2.47547200 |
| H | -2.31962300 | 1.43756400  | -3.35370800 |
| H | -1.71773600 | 1.32036400  | -5.74509900 |
| H | 0.66474600  | 1.43400500  | -6.44431900 |
| H | 2.45005600  | 1.64193400  | -4.71995400 |
| H | 1.85930800  | 1.71223700  | -2.32602600 |
| H | 1.33209600  | 2.62842600  | 1.84572100  |
| H | 2.56027900  | 2.37757300  | 0.50493400  |
| H | 2.94788000  | 1.10510700  | 3.95421700  |
| H | 2.17445600  | -0.43601900 | 3.57454300  |
| H | -0.40932100 | -0.41153400 | 3.14433200  |
| H | -2.53223900 | 0.55662200  | 3.94582500  |
| H | -2.54165500 | 2.74169400  | 5.13545100  |
| H | -0.39727600 | 3.94214500  | 5.52773000  |
| H | 1.73143500  | 2.97164200  | 4.72283000  |
| H | 3.87859400  | -0.68889900 | 1.95606900  |
| H | 4.50039500  | 0.92401700  | 2.33006600  |
| H | 3.62313100  | -1.41487100 | -0.40062300 |
| H | 4.44140300  | -1.17095600 | -2.72547100 |
| H | 5.64378100  | 0.89803500  | -3.41239600 |
| H | 6.01718600  | 2.71613600  | -1.75678200 |
| H | 5.19960300  | 2.46627000  | 0.56493800  |

### TS1

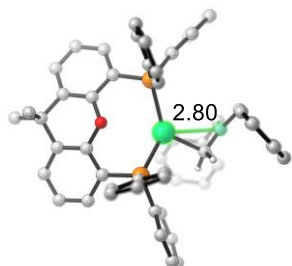

|    |             |             |             |
|----|-------------|-------------|-------------|
| Pd | -0.46280000 | 0.10066300  | 0.13234600  |
| P  | 1.12024500  | 2.01936300  | 0.06793200  |
| P  | -0.39337900 | -2.08146200 | -0.59149000 |
| O  | 2.29599100  | -0.72691800 | -0.22519800 |
| N  | -2.72197600 | 1.33134600  | 1.23458400  |
| C  | 2.78476200  | 1.44750200  | 0.63744700  |
| C  | 3.69481200  | 2.30878600  | 1.26917600  |
| C  | 4.94879400  | 1.85484500  | 1.66826700  |
| C  | 5.32527300  | 0.53634000  | 1.41704700  |
| C  | 4.46306900  | -0.35300500 | 0.76713700  |
| C  | 3.19382900  | 0.11968800  | 0.40637200  |
| C  | 4.86540700  | -1.76929500 | 0.34372400  |
| C  | 3.61310200  | -2.65064200 | 0.39049000  |

|   |             |             |             |
|---|-------------|-------------|-------------|
| C | 2.38022200  | -2.08338000 | 0.03997400  |
| C | 1.20254100  | -2.84764300 | -0.07582900 |
| C | 1.28300900  | -4.22145200 | 0.20117200  |
| C | 2.48840900  | -4.80127300 | 0.58721200  |
| C | 3.63921300  | -4.01995600 | 0.67722700  |
| C | 5.35976000  | -1.71035300 | -1.13198000 |
| C | 6.00033700  | -2.33195400 | 1.21845900  |
| C | 1.45729800  | 2.62734500  | -1.64046500 |
| C | 2.46419900  | 3.57002700  | -1.91060200 |
| C | 2.70884400  | 3.98419700  | -3.21884200 |
| C | 1.95946300  | 3.45568400  | -4.27482100 |
| C | 0.96611600  | 2.51093800  | -4.01814200 |
| C | 0.71493900  | 2.09872600  | -2.70656600 |
| C | 0.80170400  | 3.53872400  | 1.06537200  |
| C | 0.86177800  | 3.46930700  | 2.46994600  |
| C | 0.51182400  | 4.56924100  | 3.25316300  |
| C | 0.07778400  | 5.75271900  | 2.64879300  |
| C | 0.00275100  | 5.82867100  | 1.25804200  |
| C | 0.36299900  | 4.73173200  | 0.46951000  |
| C | -1.66838200 | -3.28765800 | -0.03970400 |
| C | -1.94854600 | -3.37540400 | 1.33647400  |
| C | -2.92385300 | -4.25547400 | 1.80388200  |
| C | -3.64079000 | -5.04988200 | 0.90494600  |
| C | -3.37460300 | -4.96327900 | -0.46213200 |
| C | -2.39324700 | -4.08836900 | -0.93525700 |
| C | -0.40286100 | -2.19121900 | -2.43049300 |
| C | 0.44580400  | -3.05520300 | -3.13859900 |
| C | 0.38528800  | -3.11658100 | -4.53274800 |
| C | -0.52555000 | -2.32428300 | -5.23333200 |
| C | -1.37610100 | -1.46249100 | -4.53601800 |
| C | -1.31026800 | -1.38981700 | -3.14470000 |
| C | -2.51423900 | 0.11705000  | 0.65707700  |
| C | -2.49013200 | 1.59437700  | 2.67812400  |
| C | -2.29779600 | 0.36815100  | 3.53914300  |
| C | -1.01239800 | -0.10698900 | 3.83439300  |
| C | -0.83728200 | -1.22683300 | 4.65025700  |
| C | -1.94958700 | -1.88469400 | 5.18161900  |
| C | -3.23527900 | -1.41878800 | 4.89402000  |
| C | -3.40632000 | -0.29858400 | 4.07894900  |
| C | -3.10600900 | 2.53796700  | 0.45981700  |
| C | -3.80932800 | 2.25787900  | -0.84858300 |
| C | -3.17639600 | 2.52437900  | -2.06864200 |
| C | -3.83718700 | 2.29119700  | -3.27805800 |
| C | -5.13684000 | 1.78305200  | -3.27769100 |
| C | -5.77796400 | 1.51581800  | -2.06409100 |
| C | -5.11992400 | 1.75691100  | -0.85880400 |
| H | 3.41194700  | 3.33747900  | 1.46539200  |
| H | 5.63791600  | 2.53064600  | 2.16557100  |
| H | 6.31175700  | 0.20535400  | 1.72109200  |
| H | 0.39186500  | -4.83471500 | 0.12318000  |
| H | 2.53392000  | -5.86315000 | 0.80867200  |
| H | 4.57224900  | -4.49114900 | 0.96443000  |
| H | 6.24280900  | -1.06656200 | -1.21012200 |
| H | 5.62818800  | -2.71332300 | -1.48199700 |
| H | 4.58739700  | -1.31120100 | -1.79712400 |
| H | 5.71116500  | -2.39648100 | 2.27274700  |
| H | 6.29608500  | -3.32821800 | 0.87826800  |
| H | 6.89458400  | -1.70754500 | 1.14181200  |
| H | 3.06111100  | 3.97858700  | -1.10036900 |
| H | 3.48808600  | 4.71492700  | -3.41623500 |
| H | 2.15667000  | 3.77657000  | -5.29377800 |
| H | 0.39088700  | 2.08544400  | -4.83567000 |
| H | -0.04670800 | 1.34930900  | -2.50885500 |
| H | 1.20607100  | 2.55910200  | 2.95451600  |

|   |             |             |             |   |             |             |             |
|---|-------------|-------------|-------------|---|-------------|-------------|-------------|
| H | 0.58135000  | 4.50272800  | 4.33544100  | C | -1.01144900 | -4.10635400 | -4.12690300 |
| H | -0.19480500 | 6.60889300  | 3.25891200  | C | -0.51684800 | -2.81282100 | -3.95744500 |
| H | -0.32720100 | 6.74625100  | 0.77895700  | C | -0.38313700 | -2.27768200 | -2.67358600 |
| H | 0.31495000  | 4.81460000  | -0.61160800 | C | 0.08984100  | -3.52116300 | 1.23223500  |
| H | -1.39687300 | -2.76430500 | 2.04707100  | C | -0.11182700 | -3.41314900 | 2.62059400  |
| H | -3.12628100 | -4.31341800 | 2.86942100  | C | 0.50711100  | -4.30221100 | 3.49823700  |
| H | -4.40387700 | -5.73186300 | 1.26906300  | C | 1.34518500  | -5.30725500 | 3.00637300  |
| H | -3.92691600 | -5.57995300 | -1.16555700 | C | 1.55697900  | -5.41811300 | 1.63224300  |
| H | -2.19056700 | -4.03728800 | -1.99995200 | C | 0.93541400  | -4.53113200 | 0.74869200  |
| H | 1.15471600  | -3.68142700 | -2.60629200 | C | 0.59189600  | 3.65132200  | 0.46680900  |
| H | 1.05021000  | -3.78727500 | -5.06954000 | C | 1.08793200  | 3.43622000  | 1.76421600  |
| H | -0.57168100 | -2.37661900 | -6.31735800 | C | 1.81737500  | 4.43221300  | 2.41323100  |
| H | -2.08863500 | -0.84314600 | -5.07379400 | C | 2.06650300  | 5.64789600  | 1.77195100  |
| H | -1.96599700 | -0.70483900 | -2.61341200 | C | 1.58369200  | 5.86644000  | 0.48008800  |
| H | -2.58794200 | -0.72759500 | 1.33648600  | C | 0.85050100  | 4.87419000  | -0.17311600 |
| H | -3.01663400 | -0.01507500 | -0.29793900 | C | -0.44156500 | 2.74731900  | -2.11376700 |
| H | -3.36499700 | 2.15511300  | 3.03103200  | C | -1.61389200 | 3.19004900  | -2.74337900 |
| H | -1.62745100 | 2.26536700  | 2.76944400  | C | -1.61291000 | 3.47926700  | -4.11053800 |
| H | -0.14458100 | 0.40606200  | 3.42784300  | C | -0.44491400 | 3.33591900  | -4.85967700 |
| H | 0.16520400  | -1.57725400 | 4.87954200  | C | 0.72884700  | 2.89779000  | -4.23951200 |
| H | -1.81468200 | -2.74789600 | 5.82726600  | C | 0.72994700  | 2.59869200  | -2.87836900 |
| H | -4.10338600 | -1.91731900 | 5.31575100  | C | 2.18808300  | 0.22868500  | 0.12124500  |
| H | -4.40884300 | 0.06776600  | 3.86967400  | C | 2.99474100  | -1.29550400 | 1.88111500  |
| H | -2.21486500 | 3.15449500  | 0.29209700  | C | 3.29266900  | -0.17269800 | 2.85537600  |
| H | -3.76774200 | 3.11628100  | 1.11664200  | C | 2.37645300  | 0.14916200  | 3.86372800  |
| H | -2.16582100 | 2.92501700  | -2.07379900 | C | 2.66402600  | 1.14796300  | 4.79899400  |
| H | -3.33900700 | 2.51661400  | -4.21697700 | C | 3.87366800  | 1.84048200  | 4.72910600  |
| H | -5.65418600 | 1.60602400  | -4.21630500 | C | 4.79337200  | 1.53031100  | 3.72191200  |
| H | -6.79419500 | 1.13226600  | -2.05782800 | C | 4.50540500  | 0.52945700  | 2.79532000  |
| H | -5.62825500 | 1.55911900  | 0.08235300  | C | 3.26010300  | -1.86741000 | -0.55787200 |

## CP2

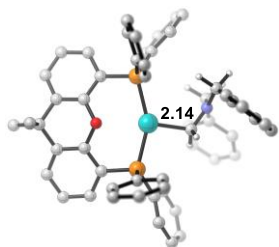

|    |             |             |             |   |             |             |             |
|----|-------------|-------------|-------------|---|-------------|-------------|-------------|
| Pd | 0.05817900  | 0.04004200  | 0.02838400  | C | 3.97819100  | -1.29190200 | -1.76614300 |
| P  | -0.62304700 | -2.24095500 | 0.11467400  | C | 3.52339800  | -1.57660900 | -3.05866700 |
| P  | -0.37264900 | 2.30945900  | -0.32721800 | C | 4.21100900  | -1.09737700 | -4.17731900 |
| O  | -2.50091600 | 0.17441300  | 0.01130500  | C | 5.35817000  | -0.32103900 | -4.01270100 |
| N  | 2.93748700  | -0.86791500 | 0.47067500  | C | 5.81722900  | -0.02773800 | -2.72485100 |
| C  | -2.39059300 | -2.13099600 | 0.66814000  | C | 5.13357000  | -0.51231500 | -1.61091200 |
| C  | -3.04079300 | -3.25988600 | 1.19092600  | H | -2.48731800 | -4.18353500 | 1.31996000  |
| C  | -4.37604700 | -3.20507200 | 1.57442300  | H | -4.86006400 | -4.08367800 | 1.98961500  |
| C  | -5.09408800 | -2.02198200 | 1.41478800  | H | -6.13782800 | -1.99959000 | 1.70522900  |
| C  | -4.50005500 | -0.87625000 | 0.87558500  | H | -1.89479200 | 4.63737400  | 0.64032600  |
| C  | -3.14248000 | -0.94853800 | 0.53082300  | H | -4.23502800 | 4.93680200  | 1.39703700  |
| C  | -5.28332800 | 0.40045300  | 0.55867100  | H | -5.78285000 | 3.02430500  | 1.40250800  |
| C  | -4.33394500 | 1.59167100  | 0.70831200  | H | -6.39994800 | -0.52805500 | -1.08350300 |
| C  | -2.98954200 | 1.43610600  | 0.34614300  | H | -6.27854700 | 1.24226800  | -1.20468700 |
| C  | -2.09675900 | 2.52306100  | 0.28378800  | H | -4.88134200 | 0.22400800  | -1.60484100 |
| C  | -2.56875000 | 3.78728300  | 0.66665900  | H | -6.27987200 | 0.59306700  | 2.50852100  |
| C  | -3.88366300 | 3.95691400  | 1.08913200  | H | -7.09685300 | 1.44428800  | 1.18099300  |
| C  | -4.75478200 | 2.86903600  | 1.09693500  | H | -7.21901300 | -0.29408100 | 1.28972800  |
| C  | -5.73687200 | 0.33039500  | -0.92994700 | H | -1.55174500 | -4.92678400 | -0.87294000 |
| C  | -6.53471200 | 0.54430100  | 1.44466300  | H | -1.76920900 | -5.86928500 | -3.13896500 |
| C  | -0.74880300 | -3.03070600 | -1.54697900 | H | -1.11312800 | -4.52477500 | -5.12415500 |
| C  | -1.25622900 | -4.32853100 | -1.72931300 | H | -0.23578500 | -2.21708500 | -4.82133600 |
| C  | -1.38045300 | -4.86309200 | -3.01082700 | H | -0.00339700 | -1.26748600 | -2.54218200 |
|    |             |             |             | H | -0.76345100 | -2.63928300 | 3.01745300  |
|    |             |             |             | H | 0.33294700  | -4.21153000 | 4.56670300  |
|    |             |             |             | H | 1.82610600  | -5.99980800 | 3.69093600  |
|    |             |             |             | H | 2.20192800  | -6.19971800 | 1.24062100  |
|    |             |             |             | H | 1.10340300  | -4.63918900 | -0.31806200 |
|    |             |             |             | H | 0.90534900  | 2.49131500  | 2.27006300  |
|    |             |             |             | H | 2.20101200  | 4.24892200  | 3.41224400  |
|    |             |             |             | H | 2.63989700  | 6.42104600  | 2.27538700  |
|    |             |             |             | H | 1.77735900  | 6.80979500  | -0.02251500 |
|    |             |             |             | H | 0.48216300  | 5.05222700  | -1.17854100 |
|    |             |             |             | H | -2.52779900 | 3.31407200  | -2.17169500 |

|   |             |             |             |
|---|-------------|-------------|-------------|
| H | -2.52751900 | 3.82145800  | -4.58647000 |
| H | -0.44699000 | 3.56468600  | -5.92150700 |
| H | 1.64288300  | 2.78549500  | -4.81565100 |
| H | 1.64979400  | 2.25726900  | -2.41041200 |
| H | 2.24434400  | 1.02815600  | 0.85852700  |
| H | 2.38914000  | 0.55559600  | -0.89894300 |
| H | 3.78250700  | -2.05421900 | 1.94244300  |
| H | 2.05669900  | -1.78741500 | 2.16569700  |
| H | 1.43809500  | -0.39714900 | 3.92703000  |
| H | 1.94809300  | 1.37608900  | 5.58394600  |
| H | 4.10605800  | 2.60961300  | 5.46054600  |
| H | 5.73989600  | 2.06082900  | 3.66754800  |
| H | 5.22953500  | 0.28507200  | 2.02179500  |
| H | 2.34831400  | -2.38492600 | -0.88831200 |
| H | 3.89107400  | -2.62215800 | -0.07570700 |
| H | 2.62994900  | -2.18232700 | -3.19192300 |
| H | 3.84948400  | -1.33213100 | -5.17473900 |
| H | 5.89504600  | 0.05171600  | -4.88042700 |
| H | 6.71276800  | 0.57254400  | -2.59006100 |
| H | 5.49552100  | -0.28361200 | -0.61173100 |

## TS2

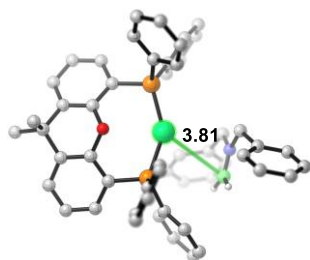

|    |             |             |             |
|----|-------------|-------------|-------------|
| Pd | -0.02866900 | 0.14768900  | -0.45663800 |
| P  | 1.62051700  | 1.75576200  | -0.62511700 |
| P  | -0.53043900 | -2.07640100 | -0.10827100 |
| O  | 2.38020200  | -1.13241900 | 0.12187600  |
| N  | -3.18700100 | 1.71557900  | 0.48001900  |
| C  | 3.08978000  | 1.15378200  | 0.33659300  |
| C  | 4.04085800  | 2.05880000  | 0.83815600  |
| C  | 5.14139400  | 1.61878000  | 1.56817100  |
| C  | 5.32497800  | 0.25575400  | 1.79918900  |
| C  | 4.41712900  | -0.68626900 | 1.30732100  |
| C  | 3.30263100  | -0.21600000 | 0.59640500  |
| C  | 4.60202500  | -2.20342300 | 1.42879700  |
| C  | 3.21168800  | -2.82505300 | 1.60465900  |
| C  | 2.14610900  | -2.26298600 | 0.88490000  |
| C  | 0.84857600  | -2.81527400 | 0.89477500  |
| C  | 0.64612200  | -3.96826200 | 1.67134900  |
| C  | 1.68071500  | -4.52983300 | 2.41351300  |
| C  | 2.95280700  | -3.95885600 | 2.37906500  |
| C  | 5.20658100  | -2.73070100 | 0.09382300  |
| C  | 5.55444500  | -2.57974900 | 2.57682600  |
| C  | 2.26573900  | 2.00224400  | -2.33893800 |
| C  | 3.60804100  | 2.30252000  | -2.61904700 |
| C  | 4.02927700  | 2.49543600  | -3.93573300 |
| C  | 3.11676400  | 2.39669700  | -4.98851400 |
| C  | 1.77943900  | 2.09735200  | -4.72173400 |
| C  | 1.35914800  | 1.89422600  | -3.40627500 |
| C  | 1.39881500  | 3.47987500  | 0.01696100  |
| C  | 1.09021000  | 3.65890000  | 1.37850100  |
| C  | 0.83385000  | 4.93017300  | 1.89110200  |
| C  | 0.86539000  | 6.04617800  | 1.04834900  |
| C  | 1.16299600  | 5.87912300  | -0.30390900 |
| C  | 1.43175000  | 4.60615200  | -0.81760800 |

|   |             |             |             |
|---|-------------|-------------|-------------|
| C | -2.04960400 | -2.57439400 | 0.82914900  |
| C | -2.13902000 | -2.29166800 | 2.20552700  |
| C | -3.32459100 | -2.51552000 | 2.90685100  |
| C | -4.45224100 | -3.01104600 | 2.24399000  |
| C | -4.37863700 | -3.28831300 | 0.87775700  |
| C | -3.18791200 | -3.07524400 | 0.17565500  |
| C | -0.55712300 | -3.13509400 | -1.62403200 |
| C | -0.71699800 | -4.53031600 | -1.57787200 |
| C | -0.70272100 | -5.28293300 | -2.75152000 |
| C | -0.52002700 | -4.65463400 | -3.98705600 |
| C | -0.34986600 | -3.27112400 | -4.04423000 |
| C | -0.36936600 | -2.51553500 | -2.86893900 |
| C | -3.60707600 | 0.54966900  | 0.79849900  |
| C | -2.66735400 | 2.70751400  | 1.47860100  |
| C | -2.70320100 | 2.25205700  | 2.91186800  |
| C | -1.65613400 | 1.47330100  | 3.42929400  |
| C | -1.67684400 | 1.06774700  | 4.76381100  |
| C | -2.74168300 | 1.43584300  | 5.59127600  |
| C | -3.78724400 | 2.20944100  | 5.08261100  |
| C | -3.76812000 | 2.61579900  | 3.74742800  |
| C | -2.96710300 | 2.12122600  | -0.94712200 |
| C | -3.86723000 | 1.43751700  | -1.94092800 |
| C | -3.41261400 | 0.31402600  | -2.64613400 |
| C | -4.24318200 | -0.31826500 | -3.57372100 |
| C | -5.53179000 | 0.16780700  | -3.80253900 |
| C | -5.98989900 | 1.29031800  | -3.10621700 |
| C | -5.16128800 | 1.92363100  | -2.18096000 |
| H | 3.90498700  | 3.12212700  | 0.66912500  |
| H | 5.85956900  | 2.33652500  | 1.95321000  |
| H | 6.19233900  | -0.07132400 | 2.36134700  |
| H | -0.34085100 | -4.41706200 | 1.71384400  |
| H | 1.49920200  | -5.41578800 | 3.01467700  |
| H | 3.75097500  | -4.41356500 | 2.95488200  |
| H | 6.19051500  | -2.28076600 | -0.07945300 |
| H | 5.32462600  | -3.81919800 | 0.13605200  |
| H | 4.56527900  | -2.48963100 | -0.75927600 |
| H | 5.18532600  | -2.23229600 | 3.54778000  |
| H | 5.69202000  | -3.66365900 | 2.62652200  |
| H | 6.54746800  | -2.15242300 | 2.41104600  |
| H | 4.32961000  | 2.37936800  | -1.81203400 |
| H | 5.07223900  | 2.72241900  | -4.13854500 |
| H | 3.44821500  | 2.54683400  | -6.01213700 |
| H | 1.06578100  | 2.01256100  | -5.53676400 |
| H | 0.32243200  | 1.63995200  | -3.19951100 |
| H | 1.07274700  | 2.79945000  | 2.04462200  |
| H | 0.61427100  | 5.05088800  | 2.94871500  |
| H | 0.66588600  | 7.03701500  | 1.44651000  |
| H | 1.19833400  | 6.74100200  | -0.96474400 |
| H | 1.67517000  | 4.49591300  | -1.86943200 |
| H | -1.27214100 | -1.90440200 | 2.73393600  |
| H | -3.36586800 | -2.30549200 | 3.97238800  |
| H | -5.37434600 | -3.18861800 | 2.79006900  |
| H | -5.24470800 | -3.68500800 | 0.35477100  |
| H | -3.14565200 | -3.31065100 | -0.88327000 |
| H | -0.85173400 | -5.03419300 | -0.62543400 |
| H | -0.82854900 | -6.36096500 | -2.70204600 |
| H | -0.50409900 | -5.24448000 | -4.89927300 |
| H | -0.19435800 | -2.77886400 | -5.00039300 |
| H | -0.21849100 | -1.43920700 | -2.90610000 |
| H | -3.65300100 | 0.25850800  | 1.84051700  |
| H | -3.92159200 | -0.13397600 | 0.01898700  |
| H | -3.26414000 | 3.61320700  | 1.32877600  |
| H | -1.64374200 | 2.92414000  | 1.15261200  |
| H | -0.83068400 | 1.18667000  | 2.78095500  |

|   |             |             |             |
|---|-------------|-------------|-------------|
| H | -0.85794000 | 0.47457400  | 5.16076400  |
| H | -2.75257800 | 1.12660100  | 6.63243100  |
| H | -4.61178000 | 2.50344300  | 5.72517300  |
| H | -4.57735800 | 3.22949000  | 3.35796300  |
| H | -1.90454600 | 1.87224800  | -1.12347000 |
| H | -3.08659000 | 3.20781900  | -0.96872400 |
| H | -2.40552300 | -0.05631300 | -2.46558500 |
| H | -3.87967200 | -1.18495400 | -4.11827900 |
| H | -6.17697700 | -0.32073300 | -4.52697700 |
| H | -6.98805800 | 1.67631200  | -3.29093200 |
| H | -5.51734200 | 2.80432600  | -1.65072100 |

### CP3

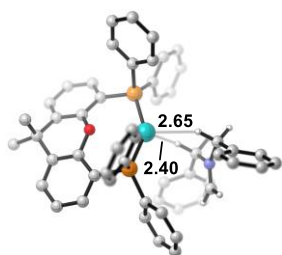

|    |             |             |             |
|----|-------------|-------------|-------------|
| Pd | 0.01327700  | 0.24019600  | -0.40333000 |
| P  | 1.85916700  | 1.57868400  | -0.77483100 |
| P  | -0.73089800 | -1.91049600 | 0.02916900  |
| O  | 2.27110800  | -1.33308700 | 0.12553400  |
| N  | -3.14079200 | 1.84376300  | 0.53218300  |
| C  | 3.27855100  | 0.84642900  | 0.17025400  |
| C  | 4.35742100  | 1.64797800  | 0.57881100  |
| C  | 5.42112300  | 1.11203100  | 1.29963200  |
| C  | 5.43745400  | -0.24682400 | 1.61227900  |
| C  | 4.39683800  | -1.09076100 | 1.21275900  |
| C  | 3.32404500  | -0.52125900 | 0.51112000  |
| C  | 4.39410400  | -2.60970300 | 1.42114000  |
| C  | 2.94435500  | -3.04205500 | 1.66970800  |
| C  | 1.93101100  | -2.38813300 | 0.95243300  |
| C  | 0.57636500  | -2.77555300 | 1.02656300  |
| C  | 0.26156500  | -3.85820600 | 1.86422400  |
| C  | 1.24527800  | -4.50623100 | 2.60572100  |
| C  | 2.57498000  | -4.09748100 | 2.50821100  |
| C  | 4.88299000  | -3.28279400 | 0.10458500  |
| C  | 5.32933900  | -3.03806300 | 2.56490000  |
| C  | 2.42670900  | 1.57114900  | -2.53144700 |
| C  | 3.77941200  | 1.53000000  | -2.90237300 |
| C  | 4.14259400  | 1.54053700  | -4.25065200 |
| C  | 3.16261400  | 1.59925800  | -5.24348700 |
| C  | 1.81335500  | 1.64187000  | -4.88526300 |
| C  | 1.44847700  | 1.61966200  | -3.53882900 |
| C  | 1.92551200  | 3.36256700  | -0.28725500 |
| C  | 1.57929300  | 3.70362400  | 1.03321800  |
| C  | 1.55540200  | 5.03609100  | 1.44184800  |
| C  | 1.86190000  | 6.05384300  | 0.53283800  |
| C  | 2.19935900  | 5.72700500  | -0.78027500 |
| C  | 2.23529600  | 4.39016600  | -1.18947700 |
| C  | -2.28681500 | -2.25330400 | 0.97862300  |
| C  | -2.35391900 | -1.92834100 | 2.34681100  |
| C  | -3.55055600 | -2.04865600 | 3.05437900  |
| C  | -4.71207300 | -2.48070000 | 2.40538100  |
| C  | -4.66117700 | -2.79663000 | 1.04668300  |
| C  | -3.45995100 | -2.68619300 | 0.33926800  |
| C  | -0.88232900 | -2.97017400 | -1.47768200 |
| C  | -1.07620100 | -4.36019600 | -1.41116000 |
| C  | -1.16754900 | -5.11744900 | -2.57829000 |
| C  | -1.06001500 | -4.49879900 | -3.82770900 |

|   |             |             |             |
|---|-------------|-------------|-------------|
| C | -0.85833500 | -3.12063900 | -3.90555000 |
| C | -0.76948900 | -2.36028200 | -2.73639000 |
| C | -3.98009200 | 1.06356100  | 1.10355900  |
| C | -1.99525200 | 2.48840200  | 1.24481200  |
| C | -2.05637900 | 2.43708000  | 2.74610700  |
| C | -1.24916300 | 1.52968100  | 3.44684600  |
| C | -1.27514100 | 1.49584300  | 4.84263800  |
| C | -2.11258900 | 2.36267200  | 5.54749500  |
| C | -2.91882800 | 3.27174400  | 4.85622100  |
| C | -2.88726500 | 3.31264900  | 3.46268100  |
| C | -3.07756100 | 2.04116300  | -0.95356400 |
| C | -4.22427300 | 1.45587900  | -1.72948300 |
| C | -4.09904300 | 0.19574600  | -2.33243400 |
| C | -5.15683400 | -0.33883200 | -3.06988400 |
| C | -6.34707000 | 0.37829800  | -3.20731600 |
| C | -6.47904200 | 1.63547000  | -2.61101300 |
| C | -5.42164800 | 2.17301600  | -1.87776600 |
| H | 4.35322000  | 2.70653900  | 0.34054800  |
| H | 6.24124000  | 1.75110500  | 1.61292100  |
| H | 6.27888400  | -0.64927700 | 2.16510500  |
| H | -0.76992700 | -4.18253200 | 1.95382800  |
| H | 0.97823300  | -5.33483300 | 3.25486900  |
| H | 3.33001100  | -4.61981800 | 3.08494100  |
| H | 5.90987000  | -2.97307700 | -0.11928000 |
| H | 4.86301700  | -4.37352300 | 0.20692100  |
| H | 4.24974000  | -3.00782300 | -0.74439900 |
| H | 5.03396900  | -2.59775700 | 3.52330000  |
| H | 5.33782900  | -4.12651400 | 2.67177800  |
| H | 6.36089500  | -2.74351300 | 2.35207700  |
| H | 4.55203400  | 1.48497600  | -2.14144700 |
| H | 5.19340700  | 1.50325400  | -4.52424400 |
| H | 3.44896000  | 1.60714000  | -6.29142200 |
| H | 1.04572500  | 1.68292000  | -5.65329800 |
| H | 0.39727500  | 1.63272100  | -3.26046200 |
| H | 1.34275600  | 2.91970500  | 1.74944800  |
| H | 1.29918900  | 5.28066100  | 2.46933200  |
| H | 1.84039100  | 7.09292300  | 0.84910200  |
| H | 2.44400100  | 6.51120900  | -1.49152800 |
| H | 2.50998900  | 4.15199200  | -2.21198600 |
| H | -1.46073400 | -1.59512300 | 2.86779500  |
| H | -3.57336000 | -1.81239900 | 4.11510000  |
| H | -5.64237100 | -2.58156800 | 2.95731500  |
| H | -5.55385000 | -3.14528000 | 0.53422500  |
| H | -3.43768700 | -2.95192600 | -0.71283000 |
| H | -1.15207200 | -4.85578900 | -0.44786300 |
| H | -1.31694200 | -6.19165900 | -2.51354100 |
| H | -1.12596800 | -5.09254500 | -4.73514600 |
| H | -0.76091000 | -2.63633400 | -4.87333000 |
| H | -0.58952400 | -1.28910500 | -2.79062200 |
| H | -3.91867300 | 0.90892200  | 2.17365000  |
| H | -4.73026000 | 0.56016500  | 0.50555000  |
| H | -1.95155000 | 3.51520300  | 0.86913800  |
| H | -1.10941100 | 1.94404500  | 0.85060200  |
| H | -0.59121000 | 0.86493400  | 2.89169800  |
| H | -0.63723000 | 0.79847600  | 5.37807600  |
| H | -2.13137200 | 2.33797400  | 6.63317500  |
| H | -3.56164200 | 3.95561100  | 5.40261700  |
| H | -3.50234900 | 4.03518500  | 2.93028300  |
| H | -2.10932100 | 1.58667300  | -1.23290900 |
| H | -2.99772600 | 3.12293900  | -1.09908800 |
| H | -3.16861400 | -0.35786200 | -2.23484200 |
| H | -5.04722100 | -1.31037000 | -3.54286400 |
| H | -7.16801100 | -0.03637800 | -3.78503300 |
| H | -7.39940100 | 2.20021900  | -2.72627500 |

H -5.52191400 3.15908800 -1.42915000

### CP4

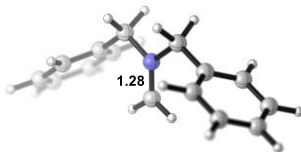

N -0.00000600 -0.00029100 0.49498400  
C -0.00001400 0.00021600 -0.78197600  
C -1.26884900 -0.00040200 1.31885800  
C -2.54230200 -0.00019900 0.52326400  
C -3.14481800 1.21243500 0.15416100  
C -4.33260000 1.21136400 -0.57705900  
C -4.92566300 0.00038600 -0.94355300  
C -4.33274300 -1.21089700 -0.57776400  
C -3.14497900 -1.21255600 0.15346700  
C 1.26884800 -0.00070700 1.31885300  
C 2.54230400 -0.00029800 0.52326100  
C 3.14471300 1.21240900 0.15419200  
C 4.33247600 1.21146000 -0.57703900  
C 4.92566300 0.00053700 -0.94356000  
C 4.33287700 -1.21080200 -0.57778000  
C 3.14509800 -1.21258100 0.15344300  
H -0.94739400 0.00070400 -1.31099600  
H 0.94735100 0.00005600 -1.31101600  
H -1.18722400 -0.88396100 1.96018700  
H -1.18720500 0.88291800 1.96047600  
H -2.69480300 2.15679400 0.45254200  
H -4.79947600 2.15259000 -0.85041500  
H -5.85433100 0.00061500 -1.50621900  
H -4.79969300 -2.15190600 -0.85173100  
H -2.69516100 -2.15715100 0.45141100  
H 1.18723300 0.88236400 1.96082400  
H 1.18718800 -0.88452100 1.95982000  
H 2.69463900 2.15671800 0.45264800  
H 4.79924900 2.15273200 -0.85041000  
H 5.85432300 0.00088100 -1.50623800  
H 4.79992900 -2.15176300 -0.85173500  
H 2.69535300 -2.15722500 0.45134400

### Pd<sup>0</sup>

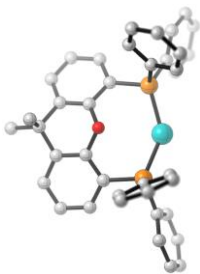

Pd -0.00003200 -1.32218200 -0.69220600  
P -2.15400800 -0.66815700 -0.25959700  
P 2.15403500 -0.66829100 -0.25965300  
O 0.00015300 1.41497100 0.41451400  
C -2.27697800 1.19004000 -0.31887300  
C -3.45486200 1.83533400 -0.72956700  
C -3.52879900 3.22366800 -0.81969600  
C -2.42413000 4.00550000 -0.48536700  
C -1.23375800 3.41258800 -0.05548000  
C -1.17876600 2.01202000 0.00758400  
C 0.00025200 4.19193500 0.41345100

C 1.23415100 3.41250200 -0.05562100  
C 1.17907200 2.01194200 0.00746800  
C 2.27719800 1.18987400 -0.31907100  
C 3.45507900 1.83507500 -0.72990800  
C 3.52909200 3.22340600 -0.82008300  
C 2.42451800 4.00532400 -0.48564900  
C 0.00034700 4.22556200 1.96985300  
C 0.00028000 5.64115000 -0.10153900  
C -2.72077100 -1.06728800 1.45789700  
C -3.44143100 -0.17800600 2.26915100  
C -3.83949100 -0.55357700 3.55491200  
C -3.52893400 -1.82321800 4.04413500  
C -2.81157400 -2.71653500 3.24461500  
C -2.40398700 -2.33828600 1.96554700  
C -3.59815600 -1.18802500 -1.30157800  
C -3.36672500 -1.35572700 -2.67746200  
C -4.39358400 -1.76250100 -3.52889900  
C -5.66520200 -2.02908000 -3.01475700  
C -5.90301700 -1.88161900 -1.64731500  
C -4.87827300 -1.46073000 -0.79556200  
C 3.59842200 -1.18839900 -1.30117300  
C 3.36733800 -1.35622900 -2.67709700  
C 4.39439200 -1.76317500 -3.52822100  
C 5.66584700 -2.02980300 -3.01371000  
C 5.90331100 -1.88222500 -1.64621500  
C 4.87838000 -1.46116800 -0.79478000  
C 2.72026000 -1.06728300 1.45806500  
C 3.44108600 -0.17806900 2.26925600  
C 3.83874900 -0.55347900 3.55518200  
C 3.52761600 -1.82289200 4.04464100  
C 2.81008600 -2.71613000 3.24519100  
C 2.40290400 -2.33803900 1.96594400  
H -4.32021200 1.23891400 -0.99835900  
H -4.44953300 3.69681200 -1.14943200  
H -2.49788000 5.08535400 -0.55551000  
H 4.32037200 1.23860100 -0.99876000  
H 4.44982400 3.69647800 -1.14992700  
H 2.49833500 5.08517200 -0.55581800  
H -0.88933800 4.75020100 2.33719200  
H 0.89008700 4.75018600 2.33708300  
H 0.00036500 3.21581600 2.39046300  
H 0.00021400 5.68729600 -1.19592700  
H 0.87692900 6.18240600 0.26725800  
H -0.87627400 6.18248200 0.26736900  
H -3.69092000 0.81217800 1.89987000  
H -4.39257400 0.14890200 4.17334000  
H -3.83786600 -2.11304400 5.04508100  
H -2.55833300 -3.70408200 3.62152000  
H -1.82271400 -3.02401000 1.35396500  
H -2.36991500 -1.17661400 -3.07433300  
H -4.19740000 -1.88504100 -4.59095900  
H -6.46325900 -2.35814800 -3.67515300  
H -6.88800400 -2.09422700 -1.23927700  
H -5.07627100 -1.34947100 0.26628100  
H 2.37065100 -1.17707200 -3.07425900  
H 4.19847900 -1.88581600 -4.59031900  
H 6.46405800 -2.35900600 -3.67385200  
H 6.88817600 -2.09487800 -1.23790300  
H 5.07607800 -1.34981600 0.26710800  
H 3.69099800 0.81193900 1.89978600  
H 4.39196300 0.14893800 4.17356300  
H 3.83623500 -2.11259600 5.04571800  
H 2.55639700 -3.70349100 3.62228300  
H 1.82150600 -3.02368400 1.35439600

**1**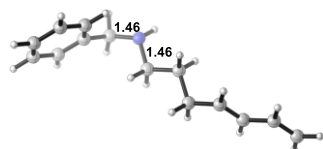

|   |             |             |             |
|---|-------------|-------------|-------------|
| C | -6.09615900 | 0.60348900  | 0.20273500  |
| H | -6.04400700 | 1.30588300  | 1.03550100  |
| C | -7.29403000 | 0.15420800  | -0.20082600 |
| H | -7.39058900 | -0.54648200 | -1.02747200 |
| H | -8.21503500 | 0.47082200  | 0.27926100  |
| C | -4.82495000 | 0.22000700  | -0.39561700 |
| H | -4.87196200 | -0.48329600 | -1.22895300 |
| C | -3.62793500 | 0.67653400  | 0.00998900  |
| H | -3.59150800 | 1.37883200  | 0.84560100  |
| C | -2.30397500 | 0.28805900  | -0.58329200 |
| H | -1.80110800 | 1.18571800  | -0.97643300 |
| H | -2.46361300 | -0.37986900 | -1.44021100 |
| C | -1.36500700 | -0.38645100 | 0.43637300  |
| H | -1.20151800 | 0.27819100  | 1.29425000  |
| H | -1.85531500 | -1.28874200 | 0.82996800  |
| C | -0.00772400 | -0.75766700 | -0.16393900 |
| H | -0.15743000 | -1.41576100 | -1.04365800 |
| H | 0.48960900  | 0.14653100  | -0.53652200 |
| N | 0.86501700  | -1.36434500 | 0.84096600  |
| H | 0.40178500  | -2.18232300 | 1.23246200  |
| C | 2.17372500  | -1.76512700 | 0.32348400  |
| H | 2.61995500  | -2.43981100 | 1.06724300  |
| H | 2.10340400  | -2.34260900 | -0.61852200 |
| C | 3.10858200  | -0.58664000 | 0.10470700  |
| C | 3.96298000  | -0.55071500 | -1.00295200 |
| C | 3.16213000  | 0.46424100  | 1.03066600  |
| C | 4.86242500  | 0.50322000  | -1.18003000 |
| H | 3.92392000  | -1.35526900 | -1.73469300 |
| C | 4.05547000  | 1.52092100  | 0.85409300  |
| H | 2.48666600  | 0.44481600  | 1.88087500  |
| C | 4.91142800  | 1.54305800  | -0.25060700 |
| H | 5.51801600  | 0.51449300  | -2.04711500 |
| H | 4.08473600  | 2.32958800  | 1.58029400  |
| H | 5.60712500  | 2.36688700  | -0.38733600 |

**TS3**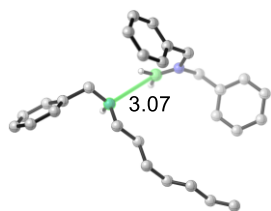

|   |             |             |             |
|---|-------------|-------------|-------------|
| N | -1.41160200 | -2.01668500 | -1.26912200 |
| C | -0.29982200 | -1.49411800 | -1.63362700 |
| C | -1.55184100 | -2.88876600 | -0.04845100 |
| C | -0.28016900 | -3.12712700 | 0.71625800  |
| C | 0.57027000  | -4.18649900 | 0.36557400  |
| C | 1.73703300  | -4.42259000 | 1.09213900  |
| C | 2.06013300  | -3.60525200 | 2.17864600  |
| C | 1.21610800  | -2.55075900 | 2.53692400  |
| C | 0.05075200  | -2.31085400 | 1.80736500  |
| C | -2.67436400 | -1.80989000 | -2.05653800 |
| C | -3.77166500 | -1.15346300 | -1.25235700 |
| C | -3.68919400 | 0.20480600  | -0.91117500 |
| C | -4.71644300 | 0.81052400  | -0.18845600 |

|   |             |             |             |
|---|-------------|-------------|-------------|
| C | -5.83476700 | 0.06301200  | 0.19332900  |
| C | -5.92551800 | -1.28784000 | -0.14601900 |
| C | -4.89558300 | -1.89551700 | -0.86599000 |
| H | 0.60949200  | -1.60883300 | -1.05390400 |
| H | -0.27393600 | -0.88935400 | -2.53436400 |
| H | -2.31390900 | -2.40223300 | 0.56528300  |
| H | -1.98063700 | -3.82480300 | -0.42269200 |
| H | 0.31193600  | -4.83834200 | -0.46625300 |
| H | 2.38482100  | -5.25051100 | 0.82055800  |
| H | 2.96176700  | -3.79781600 | 2.75251700  |
| H | 1.45623700  | -1.92606200 | 3.39210900  |
| H | -0.61334600 | -1.50014900 | 2.09799200  |
| H | -2.39664400 | -1.21741900 | -2.93224800 |
| H | -2.98168000 | -2.80319300 | -2.39844700 |
| H | -2.82958100 | 0.79868300  | -1.21435500 |
| H | -4.65031400 | 1.86426300  | 0.06589400  |
| H | -6.63819200 | 0.53753300  | 0.74898500  |
| H | -6.79740400 | -1.86745500 | 0.14180300  |
| H | -4.97480800 | -2.94497500 | -1.14056000 |
| C | -3.64611500 | 4.55771500  | 0.56005500  |
| H | -3.60659700 | 5.05697200  | -0.40850700 |
| C | -4.77691300 | 4.61288300  | 1.28211500  |
| H | -4.85110100 | 4.14413600  | 2.26122900  |
| H | -5.65433400 | 5.14596700  | 0.92947600  |
| C | -2.43280500 | 3.87173900  | 0.98603600  |
| H | -2.46893000 | 3.38180600  | 1.96077700  |
| C | -1.29574200 | 3.82322600  | 0.27060000  |
| H | -1.26173200 | 4.32694300  | -0.69761000 |
| C | -0.03594800 | 3.12611300  | 0.69979100  |
| H | -0.16855000 | 2.70494400  | 1.70510900  |
| H | 0.78295000  | 3.85756300  | 0.77298500  |
| C | 0.39343000  | 2.01323400  | -0.27681100 |
| H | -0.41553400 | 1.27334700  | -0.36304000 |
| H | 0.53011400  | 2.44680500  | -1.27886600 |
| C | 1.68201100  | 1.30869300  | 0.15178800  |
| H | 2.47690300  | 2.05567700  | 0.30534700  |
| H | 1.52819200  | 0.81028300  | 1.11840200  |
| N | 2.07093300  | 0.27389200  | -0.82090100 |
| H | 2.23648200  | 0.73901900  | -1.71596600 |
| C | 3.31810300  | -0.44865000 | -0.46326400 |
| H | 3.15159500  | -0.91698700 | 0.51365000  |
| H | 3.43573500  | -1.26012200 | -1.19268100 |
| C | 4.57931000  | 0.39548300  | -0.43639300 |
| C | 5.24459100  | 0.70244600  | -1.63241300 |
| C | 5.08880100  | 0.90673100  | 0.76448300  |
| C | 6.38452800  | 1.50638100  | -1.63079900 |
| H | 4.87572100  | 0.29667400  | -2.57335600 |
| C | 6.23048200  | 1.71112000  | 0.77132300  |
| H | 4.59493300  | 0.66530400  | 1.70344500  |
| C | 6.87924800  | 2.01419600  | -0.42684900 |
| H | 6.89244200  | 1.72821300  | -2.56524000 |
| H | 6.61523800  | 2.09586800  | 1.71171400  |
| H | 7.76988900  | 2.63593800  | -0.42272100 |

**CP5**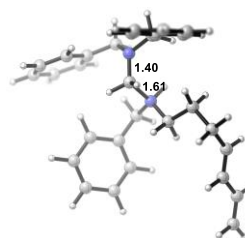

|   |             |             |             |
|---|-------------|-------------|-------------|
| N | -1.82388500 | 1.13968000  | -0.82539200 |
| C | -0.85814300 | 0.47530500  | -0.06027100 |
| C | -1.51753700 | 2.50543800  | -1.28783300 |
| C | -1.21317700 | 3.48993900  | -0.17169300 |
| C | -1.97470900 | 3.50882400  | 1.00535200  |
| C | -1.72878700 | 4.46357100  | 1.99249400  |
| C | -0.72412400 | 5.41805800  | 1.81318800  |
| C | 0.03384500  | 5.41243400  | 0.64145100  |
| C | -0.20794100 | 4.45067100  | -0.34248900 |
| C | -2.75528300 | 0.37415000  | -1.67321000 |
| C | -3.44173300 | -0.78438700 | -0.97567200 |
| C | -3.58628700 | -2.01114800 | -1.63701400 |
| C | -4.27294100 | -3.06994500 | -1.03655600 |
| C | -4.81672200 | -2.91411000 | 0.23921600  |
| C | -4.67988700 | -1.69298700 | 0.90653700  |
| C | -4.00262300 | -0.63372000 | 0.30133100  |
| H | -0.38588100 | 1.16632000  | 0.63681300  |
| H | -1.26783200 | -0.38069400 | 0.47203600  |
| H | -0.69392200 | 2.52106300  | -2.02385400 |
| H | -2.40385700 | 2.84450500  | -1.83620800 |
| H | -2.76650300 | 2.77776600  | 1.14395800  |
| H | -2.32769600 | 4.46812700  | 2.89877800  |
| H | -0.53702300 | 6.16352500  | 2.58044500  |
| H | 0.81208500  | 6.15507700  | 0.49085600  |
| H | 0.37912400  | 4.45930400  | -1.25875300 |
| H | -3.51475700 | 1.09148100  | -2.00596500 |
| H | -2.27003500 | 0.00921000  | -2.59530300 |
| H | -3.17731400 | -2.13578600 | -2.63800100 |
| H | -4.38189700 | -4.01196800 | -1.56595600 |
| H | -5.35130300 | -3.73480200 | 0.70842100  |
| H | -5.11208200 | -1.56174100 | 1.89450800  |
| H | -3.91383200 | 0.31810000  | 0.81835100  |
| C | 6.44391100  | -0.76711600 | -0.73304800 |
| H | 6.58979500  | -0.55997100 | -1.79320400 |
| C | 7.19594000  | -1.70145100 | -0.13292300 |
| H | 7.08670100  | -1.92896300 | 0.92525800  |
| H | 7.95175100  | -2.26095100 | -0.67499600 |
| C | 5.42368300  | 0.01684500  | -0.04979700 |
| H | 5.29255200  | -0.18368400 | 1.01532100  |
| C | 4.66651600  | 0.96210300  | -0.63501400 |
| H | 4.81296100  | 1.17255200  | -1.69656900 |
| C | 3.62191900  | 1.78722900  | 0.06582500  |
| H | 3.85641000  | 2.85499200  | -0.03997000 |
| H | 3.62993900  | 1.57329000  | 1.14237800  |
| C | 2.19229400  | 1.57461600  | -0.48933000 |
| H | 1.51434400  | 2.29944600  | -0.02646300 |
| H | 2.19556700  | 1.78025100  | -1.57073500 |
| C | 1.71936200  | 0.14310400  | -0.24838600 |
| H | 2.44239200  | -0.55898800 | -0.66870400 |
| H | 1.62178900  | -0.08518900 | 0.81617800  |
| N | 0.38010700  | -0.15391800 | -0.88345500 |
| H | 0.36566900  | 0.32751200  | -1.78802400 |
| C | 0.19930900  | -1.64961400 | -1.20121000 |
| H | -0.81074100 | -1.74605500 | -1.60268800 |
| H | 0.91596500  | -1.86023600 | -2.00040800 |
| C | 0.41016200  | -2.57755800 | -0.03091900 |
| C | 1.67883800  | -3.12599900 | 0.21731300  |
| C | -0.66455500 | -2.95324000 | 0.79138800  |
| C | 1.87792000  | -4.00054000 | 1.28494400  |
| H | 2.51377400  | -2.88746500 | -0.43717600 |
| C | -0.46288700 | -3.82645600 | 1.86094800  |
| H | -1.66727500 | -2.59190300 | 0.58186800  |
| C | 0.80802700  | -4.34574400 | 2.11378300  |
| H | 2.86348300  | -4.42099400 | 1.46078400  |

|   |             |             |            |
|---|-------------|-------------|------------|
| H | -1.30340500 | -4.11211600 | 2.48627200 |
| H | 0.96115700  | -5.03097600 | 2.94225200 |

### TS4

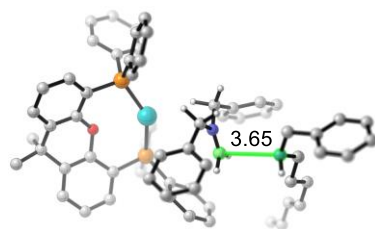

|    |             |             |             |
|----|-------------|-------------|-------------|
| Pd | -1.61868300 | -0.16789800 | -0.54530500 |
| P  | -2.94066500 | -1.99479900 | -1.02602200 |
| P  | -1.59866900 | 1.96999200  | 0.33718900  |
| O  | -4.13277100 | 0.29542600  | 0.64507200  |
| N  | 2.01587000  | -0.75664700 | -0.17323500 |
| C  | -4.31159000 | -2.06261900 | 0.22515000  |
| C  | -4.95332100 | -3.27611000 | 0.52429800  |
| C  | -5.96565100 | -3.34160200 | 1.47779700  |
| C  | -6.37015600 | -2.18611900 | 2.14541700  |
| C  | -5.77667900 | -0.95046500 | 1.87118700  |
| C  | -4.74489500 | -0.91421600 | 0.92097500  |
| C  | -6.23690900 | 0.37739600  | 2.48436200  |
| C  | -4.99710400 | 1.26167800  | 2.66460000  |
| C  | -4.00027400 | 1.20393100  | 1.67890000  |
| C  | -2.87223200 | 2.05076200  | 1.68804000  |
| C  | -2.76757700 | 2.97108700  | 2.74352300  |
| C  | -3.72925600 | 3.02881800  | 3.74848600  |
| C  | -4.83366300 | 2.17840500  | 3.70694600  |
| C  | -7.18980500 | 1.07822500  | 1.47128400  |
| C  | -6.99671000 | 0.17048000  | 3.80603500  |
| C  | -3.81451000 | -1.86891500 | -2.64949600 |
| C  | -5.12905600 | -2.31651600 | -2.85149100 |
| C  | -5.72794300 | -2.20658900 | -4.10790400 |
| C  | -5.02131000 | -1.65539300 | -5.17885800 |
| C  | -3.71259300 | -1.20675700 | -4.98903100 |
| C  | -3.11686700 | -1.30552300 | -3.73087900 |
| C  | -2.29189000 | -3.73059900 | -1.00549600 |
| C  | -1.69987500 | -4.21350800 | 0.17658100  |
| C  | -1.12141700 | -5.48111800 | 0.21871200  |
| C  | -1.10845000 | -6.28499600 | -0.92582000 |
| C  | -1.68610600 | -5.81363400 | -2.10432600 |
| C  | -2.27807000 | -4.54708100 | -2.14518600 |
| C  | -0.09081800 | 2.69349000  | 1.13686400  |
| C  | 0.39623100  | 2.12066700  | 2.32759200  |
| C  | 1.59351100  | 2.55924100  | 2.89534200  |
| C  | 2.34286400  | 3.56185600  | 2.27099400  |
| C  | 1.87917900  | 4.12848200  | 1.08215000  |
| C  | 0.67050500  | 3.70126700  | 0.52247500  |
| C  | -2.16281200 | 3.28381800  | -0.83622600 |
| C  | -2.44160700 | 4.59886500  | -0.42708400 |
| C  | -2.88328700 | 5.54766900  | -1.34840900 |
| C  | -3.06066300 | 5.19523700  | -2.68982900 |
| C  | -2.79708600 | 3.88995300  | -3.10534500 |
| C  | -2.35107000 | 2.93932700  | -2.18326100 |
| C  | 2.49278400  | 0.28740800  | 0.38719800  |
| C  | 1.73611600  | -2.02979600 | 0.57371800  |
| C  | 1.65928100  | -1.89174900 | 2.07057000  |
| C  | 0.41724700  | -1.67571200 | 2.68577100  |
| C  | 0.33031700  | -1.57800700 | 4.07505900  |
| C  | 1.48241300  | -1.68984300 | 4.85840100  |
| C  | 2.72297000  | -1.89711000 | 4.25066400  |



|   |             |             |             |
|---|-------------|-------------|-------------|
| C | 2.81199400  | -2.00088600 | 2.86122900  |
| C | 1.62311100  | -0.81642900 | -1.61839200 |
| C | 2.22427500  | 0.25373500  | -2.48754900 |
| C | 1.51590200  | 1.43613300  | -2.74561300 |
| C | 2.06802300  | 2.42438100  | -3.56335400 |
| C | 3.32975600  | 2.23840000  | -4.13171200 |
| C | 4.03907500  | 1.05860500  | -3.88600000 |
| C | 3.48822500  | 0.07102100  | -3.06941400 |
| H | -4.64051700 | -4.18207200 | 0.01558700  |
| H | -6.44281300 | -4.29175000 | 1.69871900  |
| H | -7.16490700 | -2.25338700 | 2.87972400  |
| H | -1.91073100 | 3.63506700  | 2.79065900  |
| H | -3.62310900 | 3.74143600  | 4.56109300  |
| H | -5.57931700 | 2.24367900  | 4.49122200  |
| H | -8.07750600 | 0.45994500  | 1.29716400  |
| H | -7.51297400 | 2.04846000  | 1.86474500  |
| H | -6.69632800 | 1.24704200  | 0.50931900  |
| H | -6.37651200 | -0.32152700 | 4.56306400  |
| H | -7.34168700 | 1.12682100  | 4.20921000  |
| H | -7.89310300 | -0.43554200 | 3.64630600  |
| H | -5.69088100 | -2.74548600 | -2.02791400 |
| H | -6.74831700 | -2.55222900 | -4.24900500 |
| H | -5.49049100 | -1.57123900 | -6.15513400 |
| H | -3.15902700 | -0.77185200 | -5.81688200 |
| H | -2.10540300 | -0.93687400 | -3.57749500 |
| H | -1.71181200 | -3.60181500 | 1.07573800  |
| H | -0.68452200 | -5.84408100 | 1.14546000  |
| H | -0.65647000 | -7.27239400 | -0.89482100 |
| H | -1.68781100 | -6.43389300 | -2.99659700 |
| H | -2.73409700 | -4.20072800 | -3.06705300 |
| H | -0.16964600 | 1.33553100  | 2.82079800  |
| H | 1.93811000  | 2.11662900  | 3.82667100  |
| H | 3.27608600  | 3.90358100  | 2.70953000  |
| H | 2.45281400  | 4.91345000  | 0.59676300  |
| H | 0.31531500  | 4.16685900  | -0.39131700 |
| H | -2.31965600 | 4.88449800  | 0.61359700  |
| H | -3.09546200 | 6.56102800  | -1.01878500 |
| H | -3.41078800 | 5.93521200  | -3.40417200 |
| H | -2.94672100 | 3.60618100  | -4.14353100 |
| H | -2.16695300 | 1.91474100  | -2.49769500 |
| H | 2.70150300  | 0.27580500  | 1.44841200  |
| H | 2.66539000  | 1.17921500  | -0.20364900 |
| H | 2.53128600  | -2.71900500 | 0.26898400  |
| H | 0.79012300  | -2.39609600 | 0.16475700  |
| H | -0.47490600 | -1.57613000 | 2.07038300  |
| H | -0.63621700 | -1.42147700 | 4.54567300  |
| H | 1.41266800  | -1.62042000 | 5.94020100  |
| H | 3.61874100  | -1.98708000 | 4.85841200  |
| H | 3.77637700  | -2.14954200 | 2.38184200  |
| H | 0.51515000  | -0.75898300 | -1.59434400 |
| H | 1.90837500  | -1.81799300 | -1.95459400 |
| H | 0.52669100  | 1.57098200  | -2.31490000 |
| H | 1.50640900  | 3.33230300  | -3.76340800 |
| H | 3.75519100  | 3.00286600  | -4.77553900 |
| H | 5.01242000  | 0.90267900  | -4.34208000 |
| H | 4.03522100  | -0.85309500 | -2.89571200 |
| C | 5.25917000  | 5.94634200  | -0.11681800 |
| H | 5.75894600  | 6.22723900  | 0.81080500  |
| C | 4.44799700  | 6.83140800  | -0.71808600 |
| H | 3.94291300  | 6.59735800  | -1.65301900 |
| H | 4.27746800  | 7.82168600  | -0.30737200 |
| C | 5.53687700  | 4.60835100  | -0.62175600 |
| H | 5.04215000  | 4.32780800  | -1.55365000 |
| C | 6.35169900  | 3.72286500  | -0.02306200 |

|   |             |             |             |
|---|-------------|-------------|-------------|
| H | 6.84719400  | 4.00790900  | 0.90713500  |
| C | 6.63305300  | 2.33714100  | -0.53049400 |
| H | 6.16115900  | 2.20249100  | -1.51292200 |
| H | 7.71575900  | 2.20951700  | -0.68037000 |
| C | 6.13602000  | 1.23603500  | 0.42828800  |
| H | 5.05963100  | 1.36609200  | 0.60049600  |
| H | 6.62057900  | 1.35755300  | 1.40819900  |
| C | 6.40353600  | -0.17249100 | -0.10483500 |
| H | 7.48903600  | -0.31043200 | -0.23926400 |
| H | 5.94985300  | -0.27916800 | -1.10038600 |
| N | 5.80724200  | -1.20075300 | 0.76216800  |
| H | 6.18176200  | -1.06902400 | 1.70335200  |
| C | 6.12924000  | -2.58449300 | 0.34342700  |
| H | 5.75198000  | -2.71123300 | -0.67941500 |
| H | 5.54646400  | -3.25832900 | 0.98487800  |
| C | 7.59617200  | -2.97513800 | 0.40391300  |
| C | 8.18243900  | -3.31311900 | 1.63258900  |
| C | 8.39962500  | -2.97900300 | -0.74368200 |
| C | 9.53652300  | -3.63730800 | 1.71493400  |
| H | 7.57002500  | -3.33439700 | 2.53291900  |
| C | 9.75586800  | -3.30404200 | -0.66710800 |
| H | 7.95856400  | -2.73455700 | -1.70789900 |
| C | 10.32758200 | -3.63194500 | 0.56312200  |
| H | 9.97266900  | -3.90337800 | 2.67389300  |
| H | 10.36334200 | -3.30527000 | -1.56799500 |
| H | 11.38118300 | -3.88924200 | 0.62417300  |

### CP6

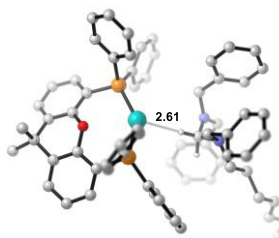

|    |             |             |             |
|----|-------------|-------------|-------------|
| Pd | 1.25868900  | 0.04369700  | -0.25647400 |
| P  | 2.55363200  | 1.89990800  | 0.21831900  |
| P  | 1.34251700  | -2.24708800 | -0.46581600 |
| O  | 3.84728500  | -0.86406400 | 0.60175800  |
| N  | -2.55473000 | 1.87991800  | 0.70881200  |
| C  | 3.92765400  | 1.41086700  | 1.36913100  |
| C  | 4.52263800  | 2.35294900  | 2.22549700  |
| C  | 5.53772200  | 1.98989100  | 3.10611700  |
| C  | 5.99030900  | 0.67137500  | 3.14326500  |
| C  | 5.44267800  | -0.29963000 | 2.30083000  |
| C  | 4.41071900  | 0.08840300  | 1.43246100  |
| C  | 5.93927100  | -1.74755300 | 2.21860200  |
| C  | 4.71455800  | -2.63477700 | 1.96778500  |
| C  | 3.72351400  | -2.14694700 | 1.10321900  |
| C  | 2.60747700  | -2.91592800 | 0.71639300  |
| C  | 2.49698200  | -4.20770600 | 1.25651000  |
| C  | 3.45086500  | -4.70255500 | 2.14231100  |
| C  | 4.55157800  | -3.92048900 | 2.49146700  |
| C  | 6.89319400  | -1.87173300 | 0.99415900  |
| C  | 6.71084900  | -2.16810500 | 3.48084800  |
| C  | 3.43363700  | 2.61604700  | -1.24197300 |
| C  | 4.62143800  | 3.35779700  | -1.13699200 |
| C  | 5.22810900  | 3.88777900  | -2.27638100 |
| C  | 4.65860300  | 3.68458400  | -3.53598300 |
| C  | 3.48195700  | 2.94337700  | -3.65352000 |
| C  | 2.87670600  | 2.40892700  | -2.51407200 |
| C  | 1.83658700  | 3.37629600  | 1.07779900  |

|   |             |             |             |
|---|-------------|-------------|-------------|
| C | 1.23797500  | 3.18289500  | 2.33690300  |
| C | 0.59546500  | 4.23302300  | 2.99056400  |
| C | 0.52047800  | 5.49454500  | 2.38886500  |
| C | 1.10189700  | 5.69476300  | 1.13692700  |
| C | 1.75992200  | 4.64504700  | 0.48638500  |
| C | -0.13434100 | -3.31181700 | -0.10246800 |
| C | -0.82774500 | -3.07470300 | 1.09959000  |
| C | -1.97859100 | -3.79693500 | 1.41617400  |
| C | -2.47467100 | -4.75458700 | 0.52345000  |
| C | -1.80439200 | -4.98771200 | -0.67817400 |
| C | -0.63923500 | -4.27639800 | -0.98789100 |
| C | 1.93426600  | -2.85535400 | -2.10868500 |
| C | 2.63113200  | -4.06347300 | -2.27383900 |
| C | 3.04291400  | -4.47473300 | -3.54253800 |
| C | 2.76514700  | -3.68626300 | -4.66182900 |
| C | 2.07866200  | -2.48039100 | -4.50856700 |
| C | 1.67118400  | -2.06573700 | -3.23936800 |
| C | -2.35521600 | 0.54714300  | 0.36853300  |
| C | -3.60205400 | 2.26801200  | 1.66377200  |
| C | -3.55256400 | 1.51940500  | 2.98696000  |
| C | -2.33867700 | 1.32659000  | 3.66296100  |
| C | -2.31363400 | 0.68060700  | 4.89912200  |
| C | -3.50061900 | 0.22169500  | 5.47891200  |
| C | -4.71288300 | 0.41274700  | 4.81575100  |
| C | -4.73566500 | 1.05651200  | 3.57555900  |
| C | -1.79996000 | 2.91151500  | -0.00633600 |
| C | -2.37182200 | 3.36340800  | -1.34687500 |
| C | -1.49876300 | 3.64885800  | -2.40679100 |
| C | -1.98437600 | 4.11942500  | -3.62915500 |
| C | -3.35636600 | 4.30454700  | -3.81574700 |
| C | -4.23780000 | 4.01844700  | -2.77054800 |
| C | -3.74889600 | 3.55437500  | -1.54603300 |
| H | 4.16875200  | 3.37859400  | 2.21660900  |
| H | 5.97734600  | 2.73374100  | 3.76400200  |
| H | 6.78331200  | 0.40495700  | 3.83318900  |
| H | 1.64544400  | -4.82594800 | 0.99137100  |
| H | 3.34132000  | -5.70084900 | 2.55563200  |
| H | 5.29161600  | -4.32542900 | 3.17278500  |
| H | 7.76707600  | -1.22485000 | 1.12983400  |
| H | 7.23928200  | -2.90598700 | 0.88809200  |
| H | 6.39355100  | -1.58090400 | 0.06536200  |
| H | 6.09230100  | -2.10051700 | 4.38223000  |
| H | 7.07520900  | -3.19522800 | 3.38679400  |
| H | 7.59510600  | -1.53955900 | 3.62000900  |
| H | 5.08166700  | 3.51659900  | -0.16666300 |
| H | 6.14875400  | 4.45680600  | -2.18047100 |
| H | 5.13578300  | 4.09523200  | -4.42147300 |
| H | 3.04210500  | 2.76996100  | -4.63210400 |
| H | 1.97557700  | 1.80660200  | -2.60370000 |
| H | 1.28728100  | 2.20429300  | 2.80926700  |
| H | 0.15412800  | 4.06970800  | 3.97038900  |
| H | 0.02008800  | 6.31382800  | 2.89757700  |
| H | 1.05704200  | 6.67271000  | 0.66506700  |
| H | 2.22150200  | 4.82295300  | -0.47975900 |
| H | -0.45190100 | -2.32679900 | 1.79465500  |
| H | -2.48359100 | -3.61911600 | 2.36242700  |
| H | -3.36909300 | -5.32047200 | 0.76937100  |
| H | -2.17509700 | -5.73801700 | -1.37171500 |
| H | -0.11656900 | -4.48518500 | -1.91605700 |
| H | 2.86175900  | -4.68092500 | -1.41095000 |
| H | 3.58542600  | -5.40934400 | -3.65574200 |
| H | 3.09128400  | -4.00668800 | -5.64742100 |
| H | 1.87191300  | -1.85646400 | -5.37389800 |
| H | 1.16287600  | -1.11290900 | -3.11246800 |

|   |             |             |             |
|---|-------------|-------------|-------------|
| H | -2.68735500 | -0.12743700 | 1.15645100  |
| H | -1.30840100 | 0.33854900  | 0.10374000  |
| H | -4.61199300 | 2.16727000  | 1.23619700  |
| H | -3.46030800 | 3.33956500  | 1.84525300  |
| H | -1.41543500 | 1.68809300  | 3.21737600  |
| H | -1.36766000 | 0.54050800  | 5.41531400  |
| H | -3.47789800 | -0.27908600 | 6.44264000  |
| H | -5.64209300 | 0.06053100  | 5.25476600  |
| H | -5.68597200 | 1.19982000  | 3.06611100  |
| H | -0.78203000 | 2.53364900  | -0.15917900 |
| H | -1.70415500 | 3.77565500  | 0.66224000  |
| H | -0.42816200 | 3.51452200  | -2.26860400 |
| H | -1.29039100 | 4.34115700  | -4.43519600 |
| H | -3.73482000 | 4.67481900  | -4.76418300 |
| H | -5.30576500 | 4.16999600  | -2.90199100 |
| H | -4.44733100 | 3.37180000  | -0.73318900 |
| C | -8.88076800 | -1.28107200 | 3.32960000  |
| H | -9.55517500 | -0.55655100 | 2.87290600  |
| C | -9.11291900 | -1.69954000 | 4.58276600  |
| H | -8.46721400 | -2.42716800 | 5.06984700  |
| H | -9.95826200 | -1.33667900 | 5.15891000  |
| C | -7.76315100 | -1.73465900 | 2.51295100  |
| H | -7.09520100 | -2.46613100 | 2.97148600  |
| C | -7.51388900 | -1.31750100 | 1.25994300  |
| H | -8.18531000 | -0.59028500 | 0.80004700  |
| C | -6.34266500 | -1.76273900 | 0.42838300  |
| H | -5.82600700 | -2.59217000 | 0.92800000  |
| H | -6.69116500 | -2.14382100 | -0.54291100 |
| C | -5.34093200 | -0.61182800 | 0.18569400  |
| H | -5.01105600 | -0.23325000 | 1.15789200  |
| H | -5.85456800 | 0.21380200  | -0.32814700 |
| C | -4.14919700 | -1.07169000 | -0.64954900 |
| H | -4.48789600 | -1.47060000 | -1.60853000 |
| H | -3.57552100 | -1.85467100 | -0.14266900 |
| N | -3.17628100 | 0.03803300  | -0.95112800 |
| H | -3.70089900 | 0.86038500  | -1.27238400 |
| C | -2.20350300 | -0.33473700 | -2.06444600 |
| H | -1.63132500 | -1.18434800 | -1.68639200 |
| H | -1.52221100 | 0.51500700  | -2.15300000 |
| C | -2.87574200 | -0.64741500 | -3.37693600 |
| C | -3.37026400 | 0.38668100  | -4.18632800 |
| C | -2.99859500 | -1.97527300 | -3.81190400 |
| C | -3.99022000 | 0.09346400  | -5.40104800 |
| H | -3.25853800 | 1.42306500  | -3.87722200 |
| C | -3.61341500 | -2.26609200 | -5.03091600 |
| H | -2.60355100 | -2.78069500 | -3.19686300 |
| C | -4.11342800 | -1.23222000 | -5.82484500 |
| H | -4.36723400 | 0.90106000  | -6.02192800 |
| H | -3.69777500 | -3.29742600 | -5.36088300 |
| H | -4.59046300 | -1.45745900 | -6.77431100 |

### TS5

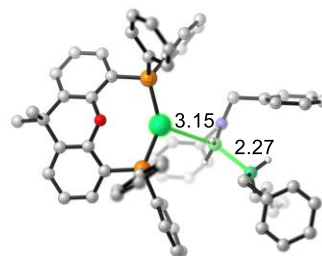

|    |            |             |            |
|----|------------|-------------|------------|
| Pd | 1.26319600 | 0.02621800  | 0.43717700 |
| P  | 2.53054700 | -1.84679700 | 0.92342300 |

|   |             |             |             |   |             |             |             |
|---|-------------|-------------|-------------|---|-------------|-------------|-------------|
| P | 1.39231200  | 2.19938300  | -0.33583500 | H | 7.36224900  | 2.08259800  | -1.64140300 |
| O | 3.87870300  | 0.43431600  | -0.60999600 | H | 6.45895700  | 1.26547900  | -0.35153500 |
| N | -1.97140700 | -1.80725200 | 0.13724100  | H | 6.23579500  | -0.12640400 | -4.47584800 |
| C | 3.93185400  | -1.94462400 | -0.29090100 | H | 7.24012500  | 1.26764200  | -4.02620600 |
| C | 4.52895900  | -3.17309000 | -0.61916200 | H | 7.71016800  | -0.33669600 | -3.50824900 |
| C | 5.56934800  | -3.24648000 | -1.54147700 | H | 5.05802300  | -3.03470400 | 2.06601500  |
| C | 6.04923300  | -2.08488500 | -2.14538800 | H | 6.09301500  | -2.88374100 | 4.29984200  |
| C | 5.50397200  | -0.83540200 | -1.83664000 | H | 5.02554200  | -1.52471600 | 6.08658000  |
| C | 4.44246500  | -0.79023000 | -0.92029500 | H | 2.90887600  | -0.30722100 | 5.61650900  |
| C | 6.04206100  | 0.49471700  | -2.37658000 | H | 1.87590700  | -0.44284100 | 3.36010400  |
| C | 4.84490100  | 1.43402600  | -2.56561900 | H | 1.46094200  | -3.49244000 | -1.25550900 |
| C | 3.81648400  | 1.38486800  | -1.61298200 | H | 0.32150400  | -5.67769400 | -1.34668000 |
| C | 2.72368000  | 2.27621400  | -1.62731700 | H | 0.00050500  | -7.01199700 | 0.73415000  |
| C | 2.68285400  | 3.22714900  | -2.66040800 | H | 0.87049700  | -6.14207900 | 2.89650400  |
| C | 3.67664500  | 3.27690600  | -3.63476200 | H | 2.03865900  | -3.97166200 | 2.98729900  |
| C | 4.74803900  | 2.38594200  | -3.58473500 | H | -0.35661100 | 1.38134500  | -2.49458100 |
| C | 6.98237600  | 1.11310000  | -1.30021300 | H | -2.29531500 | 2.39261900  | -3.63432600 |
| C | 6.84406600  | 0.30998500  | -3.67624100 | H | -3.10924400 | 4.65160900  | -2.95590100 |
| C | 3.37784500  | -1.76478900 | 2.56410500  | H | -1.93604800 | 5.88570700  | -1.14267400 |
| C | 4.57602900  | -2.44379900 | 2.83887000  | H | 0.02216400  | 4.88704100  | -0.01947200 |
| C | 5.16380700  | -2.35675600 | 4.10129000  | H | 3.07520700  | 4.70732800  | -0.37566800 |
| C | 4.56343200  | -1.59289500 | 5.10566600  | H | 3.74756100  | 6.27318700  | 1.40993100  |
| C | 3.37429500  | -0.91136400 | 4.84243500  | H | 3.02239000  | 5.88501700  | 3.75534400  |
| C | 2.78825600  | -0.99308800 | 3.57763800  | H | 1.62132300  | 3.90510800  | 4.30488100  |
| C | 1.82739300  | -3.56206600 | 0.87650900  | H | 0.96656600  | 2.31478600  | 2.51355100  |
| C | 1.32638200  | -4.06275500 | -0.33981800 | H | -1.89524800 | 0.02762700  | -0.80927400 |
| C | 0.67845100  | -5.29707300 | -0.39290700 | H | -1.28192300 | -0.04635700 | 0.94670800  |
| C | 0.50231300  | -6.04922400 | 0.77423500  | H | -3.54008800 | -2.73490200 | -0.92422400 |
| C | 0.99098800  | -5.56064700 | 1.98639200  | H | -1.98485400 | -3.56693400 | -0.93893700 |
| C | 1.65238300  | -4.32919400 | 2.03799400  | H | -0.03210500 | -1.72130000 | -2.00469000 |
| C | -0.02171200 | 3.06011400  | -1.17223600 | H | 0.47920800  | -0.91336100 | -4.28101900 |
| C | -0.69948200 | 2.36818500  | -2.19307800 | H | -1.33409600 | -0.70101500 | -5.97307300 |
| C | -1.79887300 | 2.93761500  | -2.83548100 | H | -3.66634900 | -1.32100500 | -5.36468900 |
| C | -2.25436000 | 4.20502400  | -2.45575500 | H | -4.18175100 | -2.13810900 | -3.09420300 |
| C | -1.59728500 | 4.89557200  | -1.43637600 | H | -0.91978100 | -2.07499800 | 1.91421100  |
| C | -0.48651000 | 4.33004600  | -0.79970700 | H | -1.43085000 | -3.56393000 | 1.12643600  |
| C | 1.95352000  | 3.40960300  | 0.94231800  | H | -2.21463600 | -1.14133600 | 3.68442500  |
| C | 2.74752400  | 4.52836800  | 0.64385300  | H | -4.20807100 | -1.19454000 | 5.15291700  |
| C | 3.12891400  | 5.41381300  | 1.65346300  | H | -6.11873500 | -2.69097700 | 4.60779000  |
| C | 2.72117300  | 5.19577000  | 2.97143000  | H | -6.00196700 | -4.16159000 | 2.60638400  |
| C | 1.93347400  | 4.08490500  | 3.27965100  | H | -4.00266400 | -4.13080400 | 1.15653400  |
| C | 1.55805200  | 3.19482100  | 2.27233200  | C | -7.95880300 | -2.22165500 | -4.19610700 |
| C | -1.82767400 | -0.50279600 | 0.13002400  | H | -8.52642700 | -2.81814400 | -3.48153400 |
| C | -2.45959900 | -2.58387200 | -1.03101700 | C | -7.99492100 | -2.54431800 | -5.49730100 |
| C | -2.14463600 | -1.99048000 | -2.38800700 | H | -7.44933300 | -1.97005300 | -6.24312500 |
| C | -0.83001800 | -1.64342400 | -2.73911200 | H | -8.57584200 | -3.38571800 | -5.86172500 |
| C | -0.54271400 | -1.17642700 | -4.02183900 | C | -7.20344900 | -1.10177800 | -3.65014600 |
| C | -1.56170000 | -1.05690900 | -4.97232000 | H | -6.64281000 | -0.49949800 | -4.36773800 |
| C | -2.86918300 | -1.40378900 | -4.63156000 | C | -7.17149500 | -0.76481800 | -2.34886400 |
| C | -3.15944300 | -1.86577600 | -3.34486900 | H | -7.74514000 | -1.36224300 | -1.63737700 |
| C | -1.75724500 | -2.55801100 | 1.40265700  | C | -6.40062900 | 0.39085700  | -1.77478000 |
| C | -2.98231500 | -2.60296700 | 2.29453600  | H | -5.90350200 | 0.94258000  | -2.58335600 |
| C | -3.05370600 | -1.78662100 | 3.43197300  | H | -7.09438800 | 1.09674800  | -1.29320100 |
| C | -4.17697200 | -1.81711200 | 4.26290800  | C | -5.35382300 | -0.05511500 | -0.73404100 |
| C | -5.24658900 | -2.66269000 | 3.96119000  | H | -4.67127400 | -0.77099600 | -1.20280900 |
| C | -5.18151600 | -3.48763400 | 2.83553100  | H | -5.85916900 | -0.58672200 | 0.08579700  |
| C | -4.05425800 | -3.46265700 | 2.01292200  | C | -4.55974200 | 1.11962800  | -0.16583300 |
| H | 4.15906200  | -4.08414000 | -0.16073000 | H | -5.25361600 | 1.86827000  | 0.24201000  |
| H | 6.01034500  | -4.20810000 | -1.78668900 | H | -3.98416200 | 1.61724300  | -0.95712900 |
| H | 6.86489200  | -2.15875200 | -2.85579000 | N | -3.60350600 | 0.69169800  | 0.87505800  |
| H | 1.85473800  | 3.92666300  | -2.70831100 | H | -4.07292100 | 0.06869300  | 1.53396200  |
| H | 3.62078800  | 4.01477700  | -4.42961200 | C | -2.98520300 | 1.81551700  | 1.62297000  |
| H | 5.51970000  | 2.44421300  | -4.34387200 | H | -2.38509600 | 2.38935600  | 0.90823000  |
| H | 7.83520800  | 0.44973700  | -1.11821900 | H | -2.29025200 | 1.36936900  | 2.34467800  |

|   |             |            |            |
|---|-------------|------------|------------|
| C | -3.95685300 | 2.73182900 | 2.34367300 |
| C | -4.64573200 | 2.28526000 | 3.48096900 |
| C | -4.18463300 | 4.03528600 | 1.88494700 |
| C | -5.54423600 | 3.12177400 | 4.14249000 |
| H | -4.47494000 | 1.27707800 | 3.85473200 |
| C | -5.08120800 | 4.87669300 | 2.54784300 |
| H | -3.65071600 | 4.39384700 | 1.00767500 |
| C | -5.76343100 | 4.42113700 | 3.67668100 |
| H | -6.06802100 | 2.76475900 | 5.02492100 |
| H | -5.24489200 | 5.88689800 | 2.18311800 |
| H | -6.45953700 | 5.07487800 | 4.19431700 |

### CP7

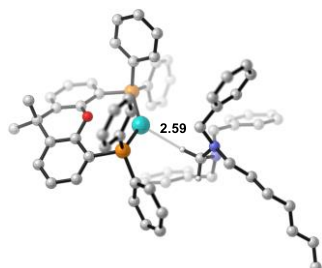

|    |             |             |             |
|----|-------------|-------------|-------------|
| Pd | 1.04131100  | -0.10032500 | -0.05301300 |
| P  | 2.16285700  | 1.85486500  | -0.54925100 |
| P  | 1.41670600  | -2.35539100 | 0.27878300  |
| O  | 3.86529800  | -0.56759900 | 0.26655200  |
| N  | -3.29179500 | 0.85268300  | 0.87400900  |
| C  | 3.81907700  | 1.83090700  | 0.29546300  |
| C  | 4.46446500  | 3.02533400  | 0.65615700  |
| C  | 5.69049100  | 3.01321700  | 1.31637100  |
| C  | 6.30852700  | 1.80055000  | 1.61904400  |
| C  | 5.71744600  | 0.58460700  | 1.26400900  |
| C  | 4.47316200  | 0.62377100  | 0.61689700  |
| C  | 6.37884600  | -0.78390500 | 1.46714800  |
| C  | 5.26813700  | -1.79306800 | 1.77975400  |
| C  | 4.04600700  | -1.65064200 | 1.10666200  |
| C  | 2.99349700  | -2.57989000 | 1.23375400  |
| C  | 3.20488700  | -3.67929000 | 2.08094000  |
| C  | 4.39858200  | -3.82848400 | 2.78250000  |
| C  | 5.41973600  | -2.89052400 | 2.63214600  |
| C  | 7.05468000  | -1.20367100 | 0.12843900  |
| C  | 7.45450600  | -0.74915400 | 2.56616900  |
| C  | 2.58420800  | 2.00778100  | -2.34267800 |
| C  | 3.84386100  | 2.41536500  | -2.80726900 |
| C  | 4.09405600  | 2.51711300  | -4.17801600 |
| C  | 3.08953000  | 2.22185300  | -5.10101800 |
| C  | 1.83073400  | 1.81728700  | -4.64966600 |
| C  | 1.58400200  | 1.70290500  | -3.28157800 |
| C  | 1.53960000  | 3.54378600  | -0.10699800 |
| C  | 1.01718900  | 3.72609000  | 1.18586000  |
| C  | 0.53920000  | 4.97269600  | 1.59068500  |
| C  | 0.54742600  | 6.05161500  | 0.70046900  |
| C  | 1.04345300  | 5.87509300  | -0.59144900 |
| C  | 1.54279000  | 4.63186700  | -0.99214700 |
| C  | 0.20145600  | -3.41021700 | 1.19789100  |
| C  | -0.02356100 | -3.16407700 | 2.56582700  |
| C  | -1.03705200 | -3.82750200 | 3.25763300  |
| C  | -1.86134200 | -4.74070800 | 2.59212400  |
| C  | -1.65460500 | -4.98797400 | 1.23450100  |
| C  | -0.63168200 | -4.33076500 | 0.54266300  |
| C  | 1.75986600  | -3.31234100 | -1.26849100 |
| C  | 2.19820900  | -4.64716700 | -1.24702200 |
| C  | 2.46755700  | -5.32261700 | -2.43685600 |

|   |             |             |             |
|---|-------------|-------------|-------------|
| C | 2.31189700  | -4.67158600 | -3.66444300 |
| C | 1.88832200  | -3.34272000 | -3.69709900 |
| C | 1.61340900  | -2.66649500 | -2.50507700 |
| C | -2.57555600 | -0.45446000 | 0.40980900  |
| C | -3.47487100 | 0.99145800  | 2.38404000  |
| C | -2.24156800 | 1.34775400  | 3.17624400  |
| C | -2.16536000 | 2.60833400  | 3.78641700  |
| C | -1.07477200 | 2.94557200  | 4.58966300  |
| C | -0.04132100 | 2.02711700  | 4.78381800  |
| C | -0.11021100 | 0.76765300  | 4.18280600  |
| C | -1.20711800 | 0.42459100  | 3.39202000  |
| C | -2.71214200 | 2.08221100  | 0.19298700  |
| C | -3.68434100 | 3.23745000  | 0.19285700  |
| C | -4.91731300 | 3.12539400  | -0.46941900 |
| C | -5.81681600 | 4.19090700  | -0.47733200 |
| C | -5.48651800 | 5.38777200  | 0.16385200  |
| C | -4.25362200 | 5.51498100  | 0.80533000  |
| C | -3.35712900 | 4.44404700  | 0.82376300  |
| H | 3.99247800  | 3.97515700  | 0.42842800  |
| H | 6.16724400  | 3.94926000  | 1.59197900  |
| H | 7.26604000  | 1.80899100  | 2.12793000  |
| H | 2.41861900  | -4.41621100 | 2.20725000  |
| H | 4.53777200  | -4.68097000 | 3.44083700  |
| H | 6.34685600  | -3.02908100 | 3.17703500  |
| H | 7.83479100  | -0.48370600 | -0.14332000 |
| H | 7.51433000  | -2.19309400 | 0.23042900  |
| H | 6.32908300  | -1.24694200 | -0.68933500 |
| H | 7.03958800  | -0.45778900 | 3.53706600  |
| H | 7.93055800  | -1.72813900 | 2.67278400  |
| H | 8.25222200  | -0.04743200 | 2.30608500  |
| H | 4.63369700  | 2.65208100  | -2.10139200 |
| H | 5.07628000  | 2.82879000  | -4.52271100 |
| H | 3.28741200  | 2.30205900  | -6.16630500 |
| H | 1.04428000  | 1.58085500  | -5.36133400 |
| H | 0.60964200  | 1.36695900  | -2.93538700 |
| H | 0.99777400  | 2.88953200  | 1.88100700  |
| H | 0.16376000  | 5.10065700  | 2.60272700  |
| H | 0.17410300  | 7.02279800  | 1.01385200  |
| H | 1.05426900  | 6.70769900  | -1.28966600 |
| H | 1.94173400  | 4.51493600  | -1.99473900 |
| H | 0.61422300  | -2.46070900 | 3.09582400  |
| H | -1.17826700 | -3.63834300 | 4.31872500  |
| H | -2.64754000 | -5.26193600 | 3.13111400  |
| H | -2.27816700 | -5.70789300 | 0.71061300  |
| H | -0.47507600 | -4.54934100 | -0.50896000 |
| H | 2.33423600  | -5.16106900 | -0.29973400 |
| H | 2.80543500  | -6.35487600 | -2.40664300 |
| H | 2.52896600  | -5.19826500 | -4.58970200 |
| H | 1.78057000  | -2.82595800 | -4.64693100 |
| H | 1.30448200  | -1.62448200 | -2.52414100 |
| H | -2.81853300 | -1.19749300 | 1.17779800  |
| H | -1.49802500 | -0.24321400 | 0.43295500  |
| H | -3.90011800 | 0.03528800  | 2.70493700  |
| H | -4.23925200 | 1.76106600  | 2.50940400  |
| H | -2.97188800 | 3.32308100  | 3.64570100  |
| H | -1.03915600 | 3.91879800  | 5.07076000  |
| H | 0.80771100  | 2.28550600  | 5.40988600  |
| H | 0.68595600  | 0.04589600  | 4.33916300  |
| H | -1.25474900 | -0.57059300 | 2.96019000  |
| H | -2.48080900 | 1.75532600  | -0.82306400 |
| H | -1.77690500 | 2.31893500  | 0.70262800  |
| H | -5.17260400 | 2.21041900  | -1.00327600 |
| H | -6.76720500 | 4.09268800  | -0.99364400 |
| H | -6.18405500 | 6.22006100  | 0.15322600  |

|   |              |             |             |
|---|--------------|-------------|-------------|
| H | -3.98644300  | 6.44908100  | 1.29083800  |
| H | -2.39001900  | 4.55261800  | 1.30651600  |
| C | -9.68100300  | -2.23960200 | 1.80203400  |
| H | -10.17519700 | -1.40705600 | 1.30075900  |
| C | -10.26482100 | -2.80555500 | 2.86848800  |
| H | -9.80726700  | -3.64128800 | 3.39349600  |
| H | -11.22020000 | -2.45739600 | 3.24847900  |
| C | -8.40412600  | -2.66575800 | 1.24564900  |
| H | -7.91656700  | -3.50687000 | 1.74206800  |
| C | -7.81263600  | -2.10246000 | 0.17867700  |
| H | -8.30877000  | -1.26641600 | -0.31827100 |
| C | -6.49236600  | -2.52740000 | -0.40006700 |
| H | -6.14116100  | -3.43951600 | 0.09904400  |
| H | -6.61415600  | -2.77691900 | -1.46472500 |
| C | -5.41199700  | -1.43088600 | -0.28046700 |
| H | -5.28201300  | -1.20833400 | 0.78964700  |
| H | -5.77266600  | -0.51185900 | -0.76600900 |
| C | -4.08441300  | -1.84710300 | -0.92128500 |
| H | -4.26331000  | -2.07601200 | -1.97588900 |
| H | -3.71296100  | -2.77191200 | -0.44614300 |
| N | -3.03878600  | -0.80407000 | -0.89008100 |
| C | -1.98822300  | -1.03030600 | -1.90687600 |
| H | -1.61087500  | -2.06236100 | -1.84337500 |
| H | -1.13403700  | -0.38565300 | -1.65060100 |
| C | -2.44716900  | -0.75975700 | -3.32734500 |
| C | -3.18136000  | 0.38729900  | -3.66182900 |
| C | -2.08768800  | -1.64658600 | -4.35087600 |
| C | -3.54159400  | 0.64326600  | -4.98497000 |
| H | -3.48114300  | 1.08165700  | -2.88157800 |
| C | -2.44237400  | -1.39055800 | -5.67732800 |
| H | -1.52002100  | -2.54210600 | -4.10762500 |
| C | -3.17175200  | -0.24497900 | -5.99815800 |
| H | -4.11106700  | 1.53682200  | -5.22629700 |
| H | -2.15569600  | -2.09095400 | -6.45688000 |
| H | -3.45382600  | -0.04642400 | -7.02820100 |
| H | -4.23878100  | 0.74830800  | 0.49560900  |

## TS6

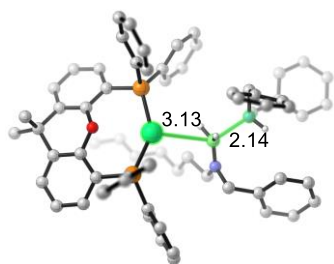

|   |             |             |             |
|---|-------------|-------------|-------------|
| C | -3.85610000 | -1.69053800 | 0.05811600  |
| C | -5.05776000 | -2.10993300 | 0.64698500  |
| C | -5.16339400 | -3.44915600 | 1.03320500  |
| C | -4.11651000 | -4.34353300 | 0.81245000  |
| C | -2.94529600 | -3.90867800 | 0.19753700  |
| C | -2.78203900 | -2.56887500 | -0.18981900 |
| H | -6.07303200 | -3.80739100 | 1.50209300  |
| H | -4.21750700 | -5.38199000 | 1.11373000  |
| H | -2.13800800 | -4.61458300 | 0.03219600  |
| C | -6.19698900 | -1.08928600 | 0.74977400  |
| C | -7.25153100 | -1.50238200 | 1.79058700  |
| H | -8.07046000 | -0.77790700 | 1.82137400  |
| H | -6.82479600 | -1.58646200 | 2.79584700  |
| H | -7.70179800 | -2.46300100 | 1.52433400  |
| C | -6.88956900 | -0.98915600 | -0.64146900 |
| H | -7.69073300 | -0.24226100 | -0.61174900 |

|    |             |             |             |
|----|-------------|-------------|-------------|
| H  | -7.32479100 | -1.95596800 | -0.91785900 |
| H  | -6.17995900 | -0.69839300 | -1.42190600 |
| C  | -5.56978100 | 0.27206300  | 1.07329400  |
| C  | -6.17883200 | 1.24546400  | 1.86977300  |
| C  | -4.33983800 | 0.58688300  | 0.47480300  |
| C  | -5.59374100 | 2.49945700  | 2.04386400  |
| H  | -7.12593100 | 1.03397800  | 2.35350200  |
| C  | -3.71573100 | 1.84141700  | 0.63479800  |
| C  | -4.38060800 | 2.79272700  | 1.42742800  |
| H  | -6.08561800 | 3.24793200  | 2.65802200  |
| H  | -3.93048300 | 3.76854100  | 1.57706900  |
| O  | -3.71927800 | -0.36493600 | -0.31175600 |
| P  | -1.23581800 | -1.97584700 | -1.02906500 |
| P  | -2.07767500 | 2.22982200  | -0.14952900 |
| C  | -1.57741600 | -2.33231000 | -2.81137300 |
| C  | -2.13994600 | -3.54268500 | -3.25024900 |
| C  | -1.28176600 | -1.34061700 | -3.75890300 |
| C  | -2.38408200 | -3.75875900 | -4.60636800 |
| H  | -2.39675800 | -4.31689600 | -2.53320300 |
| C  | -1.52821900 | -1.55712800 | -5.11693900 |
| H  | -0.87972700 | -0.38939200 | -3.41826700 |
| C  | -2.07686500 | -2.76713600 | -5.54252900 |
| H  | -2.82015600 | -4.69904200 | -4.93234700 |
| H  | -1.30218500 | -0.77712400 | -5.83903100 |
| H  | -2.27341800 | -2.93606700 | -6.59761900 |
| C  | 0.00935400  | -3.26070400 | -0.54105200 |
| C  | 0.31415000  | -3.41735300 | 0.82506500  |
| C  | 0.74487500  | -4.00179600 | -1.47905100 |
| C  | 1.30523400  | -4.30781200 | 1.23831700  |
| H  | -0.24341700 | -2.85537800 | 1.57062500  |
| C  | 1.74740800  | -4.88510900 | -1.06355100 |
| H  | 0.52595400  | -3.90642900 | -2.53776500 |
| C  | 2.02746100  | -5.04646300 | 0.29388100  |
| H  | 1.50519100  | -4.43680000 | 2.29909700  |
| H  | 2.29524600  | -5.45982600 | -1.80566800 |
| H  | 2.78940700  | -5.75084900 | 0.61667800  |
| C  | -2.52215800 | 3.16529600  | -1.68122700 |
| C  | -3.71368700 | 3.89356500  | -1.82223100 |
| C  | -1.60873700 | 3.14987800  | -2.74827100 |
| C  | -3.98019500 | 4.59346500  | -3.00028400 |
| H  | -4.44047900 | 3.91107900  | -1.01637500 |
| C  | -1.87084300 | 3.85995000  | -3.92105200 |
| H  | -0.69527400 | 2.56684900  | -2.65633200 |
| C  | -3.05920400 | 4.58158600  | -4.04994500 |
| H  | -4.90931100 | 5.14833100  | -3.09732000 |
| H  | -1.15345200 | 3.84088800  | -4.73720400 |
| H  | -3.26974000 | 5.12714500  | -4.96557800 |
| C  | -1.40897300 | 3.54163400  | 0.97957100  |
| C  | -1.02861900 | 4.81152400  | 0.52217400  |
| C  | -1.17508500 | 3.21647300  | 2.32890100  |
| C  | -0.42848100 | 5.73170200  | 1.38849100  |
| H  | -1.20681200 | 5.09177100  | -0.51123900 |
| C  | -0.59200200 | 4.14051500  | 3.19598200  |
| H  | -1.46942600 | 2.23932100  | 2.70513300  |
| C  | -0.20973400 | 5.40256200  | 2.72633900  |
| H  | -0.14627600 | 6.71261300  | 1.01548600  |
| H  | -0.44535400 | 3.88168600  | 4.24189800  |
| H  | 0.24210900  | 6.12394200  | 3.40147000  |
| Pd | -0.93633200 | 0.25934500  | -0.54279200 |
| C  | 2.09127500  | 0.45654400  | 0.23559400  |
| H  | 2.04640000  | 0.79266100  | -0.79095600 |
| H  | 1.64436000  | -0.49856900 | 0.46991100  |
| N  | 3.95465500  | -0.51347100 | -0.17745600 |
| C  | 3.88222200  | -1.22716600 | -1.48066300 |

|   |             |             |             |
|---|-------------|-------------|-------------|
| H | 2.98277600  | -1.85330000 | -1.46221900 |
| H | 4.74499000  | -1.89933900 | -1.57473700 |
| C | 4.36087200  | -1.37278100 | 0.96605900  |
| H | 4.26426100  | -0.75649000 | 1.86636700  |
| H | 3.62905900  | -2.18486600 | 1.03605000  |
| C | 3.85087300  | -0.26401500 | -2.64668300 |
| C | 2.66791700  | -0.01829200 | -3.35580100 |
| C | 5.02480500  | 0.39922300  | -3.03762700 |
| C | 2.65481600  | 0.88129900  | -4.42525500 |
| H | 1.75529700  | -0.54167900 | -3.08034900 |
| C | 5.01140600  | 1.30310100  | -4.10082600 |
| H | 5.95867000  | 0.19173100  | -2.51800800 |
| C | 3.82365300  | 1.54815200  | -4.79562300 |
| H | 1.73272900  | 1.05153300  | -4.97413100 |
| H | 5.92907800  | 1.80299600  | -4.39788600 |
| H | 3.81478000  | 2.24415900  | -5.62946900 |
| C | 5.76703100  | -1.93001700 | 0.86645600  |
| C | 6.87391200  | -1.09975500 | 1.09981800  |
| C | 5.98578700  | -3.27178200 | 0.52820200  |
| C | 8.17105100  | -1.60063300 | 0.98972300  |
| H | 6.72192900  | -0.05818400 | 1.37827200  |
| C | 7.28408800  | -3.77526900 | 0.41992900  |
| C | 8.37841700  | -2.94004700 | 0.64877300  |
| H | 9.02015200  | -0.95001600 | 1.17950100  |
| H | 9.38857200  | -3.33103800 | 0.56821600  |
| H | 4.60920500  | 0.26671500  | -0.25490700 |
| H | 5.13370500  | -3.92577500 | 0.35608600  |
| H | 7.43954700  | -4.81862900 | 0.16044600  |
| C | -1.59224700 | -2.98500300 | 5.67131000  |
| H | -0.98999500 | -3.88117500 | 5.52003500  |
| C | -2.82999800 | -3.10089400 | 6.17408600  |
| H | -3.45991000 | -2.23054900 | 6.34443000  |
| H | -3.25205200 | -4.06611300 | 6.43594400  |
| C | -0.97238300 | -1.71741100 | 5.30939300  |
| H | -1.57406700 | -0.82107700 | 5.47045000  |
| C | 0.27125400  | -1.59065900 | 4.81579300  |
| H | 0.87366500  | -2.48938600 | 4.66785000  |
| C | 0.92448600  | -0.28789700 | 4.44723700  |
| H | 0.27959900  | 0.54837600  | 4.74649100  |
| H | 1.86522800  | -0.17685500 | 5.00891400  |
| C | 1.23095200  | -0.18770600 | 2.93729400  |
| H | 0.29142100  | -0.20131300 | 2.37020800  |
| H | 1.80375100  | -1.07245900 | 2.63283600  |
| C | 2.00325500  | 1.09212800  | 2.61852900  |
| H | 2.98834200  | 1.08036800  | 3.10307700  |
| H | 1.45727300  | 1.95173600  | 3.02244000  |
| N | 2.18581900  | 1.37517100  | 1.17857600  |
| C | 2.59918300  | 2.75781300  | 0.83222500  |
| H | 1.97915900  | 3.43551600  | 1.42716100  |
| H | 2.34157000  | 2.91484300  | -0.21850200 |
| C | 4.07459700  | 3.02469000  | 1.06496100  |
| C | 4.99526700  | 2.87509300  | 0.01695600  |
| C | 4.54408300  | 3.42215200  | 2.32450300  |
| C | 6.35877100  | 3.09042000  | 0.23142900  |
| H | 4.64405400  | 2.61377600  | -0.97937600 |
| C | 5.90678100  | 3.63499400  | 2.54176400  |
| H | 3.83945500  | 3.58262600  | 3.13699400  |
| C | 6.81781900  | 3.46369600  | 1.49710200  |
| H | 7.05865000  | 2.98391400  | -0.59270300 |
| H | 6.25499800  | 3.94610900  | 3.52249500  |
| H | 7.87673000  | 3.63913200  | 1.66342900  |

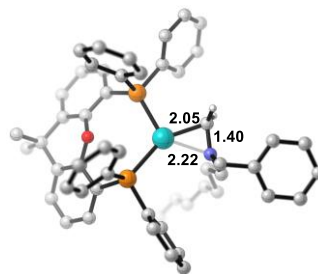

|   |             |             |             |
|---|-------------|-------------|-------------|
| C | 3.28640500  | 0.07263900  | -0.68824200 |
| C | 4.42352300  | 0.79926400  | -1.06287500 |
| C | 5.06498400  | 0.41241800  | -2.24361600 |
| C | 4.59483800  | -0.66311100 | -2.99929200 |
| C | 3.45708800  | -1.36202000 | -2.60198100 |
| C | 2.76466300  | -0.99199100 | -1.43733700 |
| H | 5.94801700  | 0.94498100  | -2.57910500 |
| H | 5.11694700  | -0.95535600 | -3.90525000 |
| H | 3.09792500  | -2.18726800 | -3.20567000 |
| C | 4.91641100  | 1.91182300  | -0.12649000 |
| C | 5.78156400  | 2.94561900  | -0.86863200 |
| H | 6.14083100  | 3.71529900  | -0.17947000 |
| H | 5.22930300  | 3.43524700  | -1.67765300 |
| H | 6.67293000  | 2.47470700  | -1.29303200 |
| C | 5.77001400  | 1.26255700  | 1.00168600  |
| H | 6.11341000  | 2.02897300  | 1.70520100  |
| H | 6.64805600  | 0.76575200  | 0.57420500  |
| H | 5.19478400  | 0.51906700  | 1.56226800  |
| C | 3.68029400  | 2.55675600  | 0.51378400  |
| C | 3.57879500  | 3.90073600  | 0.88936600  |
| C | 2.58879800  | 1.73449600  | 0.80748900  |
| C | 2.44298500  | 4.38212400  | 1.54375600  |
| H | 4.39508900  | 4.58389700  | 0.68209100  |
| C | 1.42239300  | 2.18534300  | 1.43835100  |
| C | 1.37214300  | 3.53313900  | 1.82239300  |
| H | 2.39363900  | 5.42605300  | 1.83841700  |
| H | 0.49291000  | 3.92212500  | 2.32419400  |
| O | 2.62420200  | 0.39421200  | 0.47662800  |
| P | 1.20655800  | -1.83196100 | -0.90494500 |
| P | 0.07206800  | 0.95703700  | 1.69199700  |
| C | 1.73683700  | -3.09806000 | 0.32369500  |
| C | 3.08175800  | -3.30643100 | 0.65756400  |
| C | 0.75182300  | -3.89162400 | 0.93695300  |
| C | 3.43338200  | -4.28669100 | 1.58910700  |
| H | 3.85823200  | -2.71004500 | 0.18988500  |
| C | 1.10643000  | -4.88015100 | 1.85386400  |
| H | -0.29616500 | -3.74106800 | 0.68876100  |
| C | 2.45013000  | -5.07606800 | 2.18581200  |
| H | 4.47936900  | -4.43537500 | 1.84158500  |
| H | 0.33574100  | -5.49551800 | 2.31004800  |
| H | 2.72747600  | -5.84190700 | 2.90442800  |
| C | 0.77589700  | -2.81381200 | -2.41132600 |
| C | 0.25143100  | -2.12865000 | -3.52249200 |
| C | 0.95639200  | -4.20142100 | -2.49626300 |
| C | -0.08057200 | -2.81506100 | -4.68947500 |
| H | 0.11757800  | -1.05003500 | -3.47911600 |
| C | 0.61002700  | -4.88926600 | -3.66354200 |
| H | 1.37080800  | -4.75124400 | -1.65797700 |
| C | 0.09285800  | -4.20069600 | -4.76039200 |
| H | -0.47490300 | -2.27030900 | -5.54286700 |
| H | 0.75378700  | -5.96491600 | -3.71311300 |
| H | -0.17132400 | -4.73730200 | -5.66703500 |
| C | 0.56419100  | 0.09383200  | 3.24272400  |
| C | 1.24256700  | 0.75925900  | 4.27719800  |

CP8

|    |             |             |             |
|----|-------------|-------------|-------------|
| C  | 0.22882300  | -1.25751800 | 3.40647500  |
| C  | 1.57051600  | 0.08339500  | 5.45219100  |
| H  | 1.51927200  | 1.80336600  | 4.16491800  |
| C  | 0.55583800  | -1.93201100 | 4.58466700  |
| H  | -0.27331400 | -1.78661200 | 2.60176500  |
| C  | 1.22614200  | -1.26211100 | 5.60877300  |
| H  | 2.09683900  | 0.60700100  | 6.24529300  |
| H  | 0.29798500  | -2.98139300 | 4.69412900  |
| H  | 1.48546200  | -1.78623900 | 6.52427500  |
| C  | -1.36355500 | 2.00748100  | 2.20595100  |
| C  | -2.04534300 | 1.79800300  | 3.41397700  |
| C  | -1.84721700 | 2.98787100  | 1.31957600  |
| C  | -3.18269200 | 2.54931500  | 3.72754900  |
| H  | -1.68644000 | 1.05498000  | 4.11859000  |
| C  | -2.97264600 | 3.74686800  | 1.64164600  |
| H  | -1.33152500 | 3.17110500  | 0.38002200  |
| C  | -3.64798500 | 3.52543100  | 2.84618300  |
| H  | -3.69537400 | 2.37618400  | 4.66964700  |
| H  | -3.32049200 | 4.51412000  | 0.95505500  |
| H  | -4.52429800 | 4.11622300  | 3.09700200  |
| Pd | -0.62939900 | -0.55167200 | -0.14016300 |
| C  | -2.15831900 | -1.43503200 | -1.18908600 |
| H  | -2.33597900 | -2.45897600 | -0.86701800 |
| H  | -2.11865100 | -1.30424000 | -2.26596900 |
| C  | -0.72942300 | 5.10278400  | -4.75303900 |
| H  | -0.57028900 | 4.50486000  | -5.65063100 |
| C  | -0.15701900 | 6.31169200  | -4.65687300 |
| H  | -0.29576000 | 6.94025300  | -3.77986100 |
| H  | 0.46310700  | 6.71509900  | -5.45124600 |
| C  | -1.57490100 | 4.51372800  | -3.72346100 |
| H  | -1.74002300 | 5.11744100  | -2.82900700 |
| C  | -2.15946800 | 3.30725300  | -3.81634400 |
| H  | -2.00071900 | 2.71306300  | -4.71834500 |
| C  | -3.03358200 | 2.68920700  | -2.76158400 |
| H  | -3.19641500 | 3.40588500  | -1.94591600 |
| H  | -4.02491300 | 2.46664300  | -3.18576000 |
| C  | -2.43600100 | 1.38367000  | -2.19334100 |
| H  | -1.46093000 | 1.59512700  | -1.73442500 |
| H  | -2.25096400 | 0.69114500  | -3.02356500 |
| C  | -3.36781500 | 0.75326200  | -1.15887000 |
| H  | -4.31853800 | 0.46557700  | -1.62417800 |
| H  | -3.59291200 | 1.48474100  | -0.37746400 |
| N  | -2.82082100 | -0.44099300 | -0.45558300 |
| C  | -3.62873500 | -0.85116700 | 0.73856400  |
| H  | -3.55001400 | -0.03779800 | 1.46537800  |
| H  | -3.12629200 | -1.72500400 | 1.16327300  |
| C  | -5.08377100 | -1.14985800 | 0.43792400  |
| C  | -5.46187700 | -2.34503500 | -0.19153300 |
| C  | -6.07883700 | -0.23218600 | 0.79976400  |
| C  | -6.80352800 | -2.60951000 | -0.46500100 |
| H  | -4.70726800 | -3.08063400 | -0.46093800 |
| C  | -7.42312400 | -0.49658600 | 0.53085300  |
| H  | -5.79992000 | 0.69087300  | 1.30336400  |
| C  | -7.78711700 | -1.68431000 | -0.10521200 |
| H  | -7.08293400 | -3.54094100 | -0.94907000 |
| H  | -8.18398000 | 0.22212900  | 0.82148000  |
| H  | -8.83252700 | -1.89321300 | -0.31304100 |

HNBn<sub>2</sub>

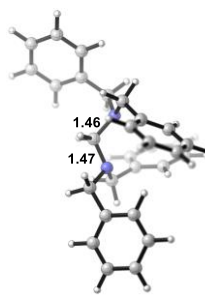

|   |             |             |             |
|---|-------------|-------------|-------------|
| N | -0.10574900 | -2.56756600 | -0.37519800 |
| C | -1.18305800 | -2.10323200 | 0.50865200  |
| H | -2.03679700 | -2.77547400 | 0.34566700  |
| H | -0.84962700 | -2.26936300 | 1.53998100  |
| C | 1.26671400  | -2.19785400 | -0.02941300 |
| H | 1.91908300  | -2.78839000 | -0.68829600 |
| H | 1.45426700  | -2.56318500 | 0.98830100  |
| C | -1.66690000 | -0.66724500 | 0.34877600  |
| C | -2.44849400 | -0.31403700 | -0.76099400 |
| C | -1.36645300 | 0.32286900  | 1.29136300  |
| C | -2.90132600 | 0.99381000  | -0.93492700 |
| H | -2.71385400 | -1.07518500 | -1.49357900 |
| C | -1.81931100 | 1.63314200  | 1.12526600  |
| H | -0.76592300 | 0.06783900  | 2.16123200  |
| C | -2.58612100 | 1.97348000  | 0.00982100  |
| H | -3.50782300 | 1.24669200  | -1.80104500 |
| H | -1.57202500 | 2.38780800  | 1.86746100  |
| H | -2.94048200 | 2.99263000  | -0.12037200 |
| C | 1.69429800  | -0.73406500 | -0.11140700 |
| C | 2.31195500  | -0.11139400 | 0.97917700  |
| C | 1.52902900  | 0.00346000  | -1.29176100 |
| C | 2.74746000  | 1.21395700  | 0.90126100  |
| H | 2.45582400  | -0.67193600 | 1.90119900  |
| C | 1.95650300  | 1.32756200  | -1.37521600 |
| C | 2.56830200  | 1.93866100  | -0.27702300 |
| H | 3.22337500  | 1.67858500  | 1.76125300  |
| H | 2.90260800  | 2.97070700  | -0.34200200 |
| H | -0.31293200 | -2.32739100 | -1.34180200 |
| H | 1.05396500  | -0.45908400 | -2.15482600 |
| H | 1.81499200  | 1.88402900  | -2.29823700 |

CP9

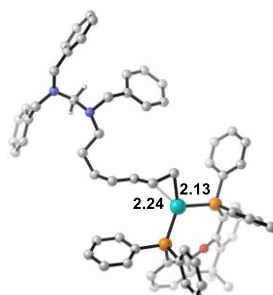

|   |             |             |             |
|---|-------------|-------------|-------------|
| N | -8.14297300 | 0.98910800  | -0.39364700 |
| C | -6.99740400 | 0.40920600  | 0.17534000  |
| C | -8.11889100 | 2.44247200  | -0.63668800 |
| C | -7.89639300 | 3.27771800  | 0.61227800  |
| C | -8.56885800 | 2.98300800  | 1.80670300  |
| C | -8.40687700 | 3.79495900  | 2.92935200  |
| C | -7.57715500 | 4.91786300  | 2.87148000  |
| C | -6.90936800 | 5.22356200  | 1.68495200  |
| C | -7.06637200 | 4.40482400  | 0.56392600  |
| C | -8.99108000 | 0.20607600  | -1.30812400 |
| C | -9.40457100 | -1.15461900 | -0.77967000 |

|   |              |             |             |   |             |             |             |
|---|--------------|-------------|-------------|---|-------------|-------------|-------------|
| C | -9.40895000  | -2.26356300 | -1.63594900 | C | 6.61154500  | 0.72018800  | 3.24066100  |
| C | -9.84936500  | -3.51137700 | -1.18703500 | C | 6.94886000  | 1.01752800  | 4.71172900  |
| C | -10.28312700 | -3.66517500 | 0.13038500  | H | 7.52618400  | 1.94293500  | 4.79720000  |
| C | -10.28343900 | -2.56446500 | 0.99255400  | H | 6.04710400  | 1.11421800  | 5.32578800  |
| C | -9.85272700  | -1.31691500 | 0.53955200  | H | 7.57227800  | 0.22415100  | 5.13477700  |
| H | -6.59687000  | 1.05876600  | 0.95303300  | C | 7.94094800  | 0.60090100  | 2.44006700  |
| H | -7.19368100  | -0.58322500 | 0.57707300  | H | 8.50665200  | 1.53725000  | 2.50456200  |
| H | -7.37476200  | 2.72638800  | -1.40247700 | H | 8.55834000  | -0.20720200 | 2.84850700  |
| H | -9.09359500  | 2.69366400  | -1.07050700 | H | 7.75254300  | 0.38680700  | 1.38373400  |
| H | -9.22400200  | 2.11745900  | 1.85293800  | C | 5.76317000  | 1.83232000  | 2.61012700  |
| H | -8.93500100  | 3.55584700  | 3.84810300  | C | 5.71810300  | 3.15509400  | 3.06182900  |
| H | -7.45534000  | 5.55139600  | 3.74517200  | C | 5.02276900  | 1.52094900  | 1.46321300  |
| H | -6.26612600  | 6.09709400  | 1.62945800  | C | 4.97794700  | 4.11927300  | 2.37643000  |
| H | -6.54930700  | 4.65422200  | -0.36039700 | H | 6.27121100  | 3.44505800  | 3.94880400  |
| H | -9.89021200  | 0.81138900  | -1.47415800 | C | 4.24827500  | 2.45520800  | 0.75990500  |
| H | -8.52936400  | 0.08511200  | -2.30393300 | C | 4.25491300  | 3.77574800  | 1.23470000  |
| H | -9.08303000  | -2.14928400 | -2.66810100 | H | 4.96601400  | 5.14501100  | 2.73365800  |
| H | -9.85181400  | -4.35917000 | -1.86591400 | H | 3.68115300  | 4.53604200  | 0.71706300  |
| H | -10.62531600 | -4.63384700 | 0.48272700  | O | 5.04057300  | 0.23107500  | 0.97175700  |
| H | -10.62996400 | -2.67550200 | 2.01616700  | P | 3.35497300  | -2.01774500 | 0.07262300  |
| H | -9.86820100  | -0.46175700 | 1.20996700  | P | 3.23842800  | 1.88169800  | -0.68965400 |
| C | -0.07435100  | 0.07701800  | -1.50644800 | C | 4.57353400  | -2.60632800 | -1.18751200 |
| H | 0.00122100   | 0.53606600  | -2.49183500 | C | 5.76563900  | -3.26699400 | -0.85194900 |
| C | 0.28509600   | -1.28345400 | -1.34810700 | C | 4.27583800  | -2.39528200 | -2.54305700 |
| H | -0.13943000  | -1.86690900 | -0.53168400 | C | 6.63559300  | -3.70829100 | -1.85074400 |
| H | 0.56838600   | -1.87399700 | -2.21806100 | H | 6.01840300  | -3.43741500 | 0.19003600  |
| C | -0.98490600  | 0.72554600  | -0.56784100 | C | 5.14107500  | -2.84594300 | -3.54077300 |
| H | -1.08394500  | 0.22985900  | 0.40211300  | H | 3.36598500  | -1.86471200 | -2.81009000 |
| C | -1.72629700  | 1.82991800  | -0.79292500 | C | 6.32430100  | -3.50210400 | -3.19629700 |
| H | -1.63907600  | 2.34682000  | -1.74954400 | H | 7.55730700  | -4.21413700 | -1.57590300 |
| C | -2.72304500  | 2.39210300  | 0.18524500  | H | 4.89667900  | -2.67421000 | -4.58562800 |
| H | -2.62234300  | 3.48243100  | 0.26368700  | H | 7.00330500  | -3.84629900 | -3.97165200 |
| H | -2.53884200  | 1.98918500  | 1.19049300  | C | 2.33433400  | -3.53239200 | 0.40737000  |
| C | -4.19476400  | 2.09031000  | -0.21087800 | C | 1.30222600  | -3.43500700 | 1.35821800  |
| H | -4.88031400  | 2.61324400  | 0.46522500  | C | 2.50819400  | -4.74824500 | -0.26802300 |
| H | -4.37274400  | 2.48287400  | -1.22400300 | C | 0.48456900  | -4.52891500 | 1.64088500  |
| C | -4.43947800  | 0.58450900  | -0.20362400 | H | 1.14674300  | -2.49745500 | 1.88743700  |
| H | -3.65275300  | 0.09719900  | -0.78179700 | C | 1.67539300  | -5.83950900 | 0.00128900  |
| H | -4.41878500  | 0.16363500  | 0.80504200  | H | 3.29984300  | -4.85107900 | -1.00310900 |
| N | -5.76292900  | 0.18298200  | -0.81701400 | C | 0.66636100  | -5.73668000 | 0.95831600  |
| H | -5.92934400  | 0.82159500  | -1.60095800 | H | -0.29009400 | -4.44069200 | 2.39911500  |
| C | -5.71512900  | -1.22944900 | -1.43051700 | H | 1.82735000  | -6.77386500 | -0.53254400 |
| H | -6.72888500  | -1.43757000 | -1.77672400 | H | 0.03077200  | -6.59075000 | 1.17669900  |
| H | -5.05878300  | -1.13718800 | -2.30043000 | C | 4.47466700  | 1.85632100  | -2.06665100 |
| C | -5.22204700  | -2.31016100 | -0.50062900 | C | 5.74028500  | 2.45367100  | -1.97558000 |
| C | -3.86041300  | -2.65418100 | -0.47663700 | C | 4.10921100  | 1.22937200  | -3.26925000 |
| C | -6.11888600  | -3.02671400 | 0.30821700  | C | 6.61975200  | 2.42094500  | -3.06029300 |
| C | -3.39891200  | -3.66771000 | 0.36327500  | H | 6.04191600  | 2.94909300  | -1.05803500 |
| H | -3.15403200  | -2.14339800 | -1.12679000 | C | 4.98256500  | 1.20923800  | -4.35684900 |
| C | -5.65535400  | -4.03800800 | 1.15047900  | H | 3.13468100  | 0.75327200  | -3.34636700 |
| H | -7.18422600  | -2.81963400 | 0.26154400  | C | 6.24285500  | 1.80231300  | -4.25332900 |
| C | -4.29616700  | -4.35524300 | 1.18390700  | H | 7.59914600  | 2.88357800  | -2.97203900 |
| H | -2.34348200  | -3.92521800 | 0.36815100  | H | 4.68258500  | 0.72386300  | -5.28192100 |
| H | -6.35991400  | -4.58710800 | 1.76809100  | H | 6.92770300  | 1.78036000  | -5.09663900 |
| H | -3.93950800  | -5.14828800 | 1.83482200  | C | 2.26765500  | 3.41966400  | -1.05837100 |
| C | 5.08765000   | -0.77608200 | 1.91253100  | C | 2.57693700  | 4.29816600  | -2.10790000 |
| C | 5.83150600   | -0.59180500 | 3.08471400  | C | 1.16510100  | 3.71477800  | -0.23839700 |
| C | 5.85254500   | -1.64628400 | 4.00258800  | C | 1.80659900  | 5.44324600  | -2.32846000 |
| C | 5.17066100   | -2.83589300 | 3.74173500  | H | 3.42552500  | 4.09678800  | -2.75322100 |
| C | 4.43996900   | -2.98688800 | 2.56395200  | C | 0.41136800  | 4.87025900  | -0.44523700 |
| C | 4.36924900   | -1.94566500 | 1.62488500  | H | 0.89958300  | 3.03599700  | 0.56710500  |
| H | 6.41184300   | -1.54885000 | 4.92676600  | C | 0.72714700  | 5.73712900  | -1.49466300 |
| H | 5.20968100   | -3.64928300 | 4.46056300  | H | 2.06183100  | 6.11170000  | -3.14654500 |
| H | 3.90927800   | -3.91447800 | 2.38003300  | H | -0.42442700 | 5.09331800  | 0.21353100  |



|    |            |             |             |
|----|------------|-------------|-------------|
| H  | 0.13768100 | 6.63519100  | -1.65955900 |
| Pd | 1.98138700 | -0.18394100 | -0.66649800 |

### TS7

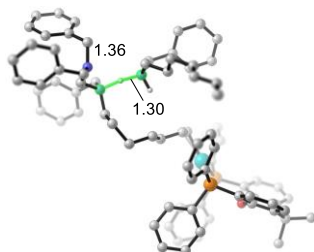

|   |             |             |             |
|---|-------------|-------------|-------------|
| N | 6.60563000  | 0.48606800  | -0.34423300 |
| C | 6.07987400  | -0.71212000 | -0.92823700 |
| C | 6.83885800  | 1.64825900  | -1.22278900 |
| C | 8.15471600  | 1.68479200  | -1.98590700 |
| C | 9.22410800  | 2.46151200  | -1.52024800 |
| C | 10.44746900 | 2.47694900  | -2.19460400 |
| C | 10.61482500 | 1.71782100  | -3.35343500 |
| C | 9.55101300  | 0.95222300  | -3.83943500 |
| C | 8.33150100  | 0.94055100  | -3.16227700 |
| C | 7.45466500  | 0.36787500  | 0.85445500  |
| C | 8.39879300  | -0.82475500 | 0.94337800  |
| C | 9.37912800  | -1.07477300 | -0.02953500 |
| C | 10.24740100 | -2.15919200 | 0.10148300  |
| C | 10.15646000 | -3.01034100 | 1.20704100  |
| C | 9.18955100  | -2.76954000 | 2.18347900  |
| C | 8.31790500  | -1.68550400 | 2.04651600  |
| H | 5.89383000  | -0.54522900 | -1.98885700 |
| H | 6.78043000  | -1.54597900 | -0.85246300 |
| H | 6.00168700  | 1.68919100  | -1.92807000 |
| H | 6.76449200  | 2.55194400  | -0.60477200 |
| H | 9.09727600  | 3.06939300  | -0.62662700 |
| H | 11.26457200 | 3.08611600  | -1.81849900 |
| H | 11.56323900 | 1.73126100  | -3.88276500 |
| H | 9.66876400  | 0.37358700  | -4.75148500 |
| H | 7.50687300  | 0.35325200  | -3.56062700 |
| H | 8.03983100  | 1.29132800  | 0.91788600  |
| H | 6.82008500  | 0.35419400  | 1.75431700  |
| H | 9.46739500  | -0.41852800 | -0.88949500 |
| H | 11.00379100 | -2.33517000 | -0.65846700 |
| H | 10.83782200 | -3.85032000 | 1.30789900  |
| H | 9.11308900  | -3.42001200 | 3.05031000  |
| H | 7.57505800  | -1.49539800 | 2.81974300  |
| C | -0.68002300 | -0.30169400 | 0.77178800  |
| H | -0.55974800 | 0.62324100  | 1.33510500  |
| C | -1.27191700 | -1.42370100 | 1.40620900  |
| H | -1.06637900 | -2.42988200 | 1.04092900  |
| H | -1.53028000 | -1.37829800 | 2.46226500  |
| C | 0.16188300  | -0.43516600 | -0.41469700 |
| H | 0.11645100  | -1.40813300 | -0.91237300 |
| C | 0.96426500  | 0.51489500  | -0.94658200 |
| H | 0.97720200  | 1.50655800  | -0.49010900 |
| C | 1.80440500  | 0.34612900  | -2.18611600 |
| H | 1.66482800  | 1.21076000  | -2.84755000 |
| H | 1.47556700  | -0.53526700 | -2.75393800 |
| C | 3.31816300  | 0.20850300  | -1.87905700 |
| H | 3.89681600  | 0.36602500  | -2.79721300 |
| H | 3.61330700  | 1.00715000  | -1.18699600 |
| C | 3.63162100  | -1.17279700 | -1.28256900 |
| H | 2.75405700  | -1.52487200 | -0.72782600 |
| H | 3.82174100  | -1.89774300 | -2.08141100 |
| N | 4.76642600  | -1.18939600 | -0.30886600 |

|    |             |             |             |
|----|-------------|-------------|-------------|
| H  | 2.68011700  | 0.33997800  | 1.18517300  |
| C  | 4.90842300  | -2.55201500 | 0.33677800  |
| H  | 5.69399800  | -2.44834000 | 1.09098800  |
| H  | 3.96389700  | -2.73610900 | 0.85939400  |
| C  | 5.21898100  | -3.72582600 | -0.57118100 |
| C  | 4.18619900  | -4.43367000 | -1.20603900 |
| C  | 6.54111500  | -4.15911100 | -0.75567500 |
| C  | 4.46793200  | -5.52198800 | -2.03217000 |
| H  | 3.15120800  | -4.14448800 | -1.03908900 |
| C  | 6.82426900  | -5.24821800 | -1.58172600 |
| H  | 7.35407300  | -3.65976900 | -0.23470200 |
| C  | 5.78991600  | -5.92744200 | -2.22748700 |
| H  | 3.65535800  | -6.05970300 | -2.51237600 |
| H  | 7.85317700  | -5.57196800 | -1.71001000 |
| H  | 6.01041500  | -6.77786500 | -2.86623800 |
| C  | 1.78629700  | 7.37125900  | 1.50061300  |
| H  | 1.11495600  | 7.32205000  | 2.35824600  |
| C  | 1.68775300  | 8.40143200  | 0.64665600  |
| H  | 2.34362100  | 8.49225400  | -0.21661900 |
| H  | 0.95522700  | 9.19029500  | 0.78566300  |
| C  | 2.74834400  | 6.28556000  | 1.36544000  |
| H  | 3.42591300  | 6.34436400  | 0.51157100  |
| C  | 2.85088800  | 5.24603600  | 2.21097900  |
| H  | 2.17799900  | 5.19236600  | 3.06882500  |
| C  | 3.83839700  | 4.12191100  | 2.07170200  |
| H  | 4.47955700  | 4.08159900  | 2.96618500  |
| H  | 4.50175200  | 4.31727700  | 1.21840700  |
| C  | 3.15844700  | 2.74731700  | 1.89857300  |
| H  | 2.50691900  | 2.54751900  | 2.75588400  |
| H  | 2.51694500  | 2.77342900  | 1.00791900  |
| C  | 4.19724600  | 1.63218100  | 1.75590000  |
| H  | 4.83553800  | 1.81154900  | 0.88544800  |
| H  | 4.84993200  | 1.60584600  | 2.63380100  |
| N  | 3.62227900  | 0.25617600  | 1.58611900  |
| H  | 4.28598400  | -0.39993200 | 0.68588700  |
| C  | 3.53326300  | -0.56021300 | 2.84905100  |
| H  | 3.05800900  | -1.50389600 | 2.56486600  |
| H  | 4.56373800  | -0.78259300 | 3.14337700  |
| C  | 2.78414600  | 0.07956000  | 3.99526900  |
| C  | 3.47749200  | 0.67721400  | 5.05601800  |
| C  | 1.38155100  | 0.07069000  | 4.01702000  |
| C  | 2.78470600  | 1.27568900  | 6.11053400  |
| H  | 4.56538100  | 0.66427400  | 5.06654300  |
| C  | 0.68897500  | 0.67062400  | 5.06884100  |
| H  | 0.82741500  | -0.41198200 | 3.21471000  |
| C  | 1.38892900  | 1.27718800  | 6.11562400  |
| H  | 3.33450900  | 1.73154600  | 6.92891900  |
| H  | -0.39732400 | 0.65433300  | 5.07733200  |
| H  | 0.84814300  | 1.73802000  | 6.93721600  |
| Pd | -2.82839500 | -0.49249800 | 0.27935700  |
| P  | -3.43064800 | 1.36757900  | -1.14604100 |
| P  | -4.67677000 | -2.00595800 | 0.53449400  |
| O  | -6.12739500 | 0.35316800  | -0.41649400 |
| C  | -4.96353700 | 2.37241000  | -0.85252300 |
| C  | -4.99426700 | 3.77319800  | -0.94197900 |
| C  | -6.14823400 | 4.48288000  | -0.61518000 |
| C  | -7.29654000 | 3.80942000  | -0.19499400 |
| C  | -7.32153100 | 2.41392800  | -0.11514200 |
| C  | -6.14728000 | 1.73072900  | -0.45822300 |
| C  | -8.55525400 | 1.58156700  | 0.26013700  |
| C  | -8.05878000 | 0.33974700  | 1.01283600  |
| C  | -6.85282300 | -0.23637600 | 0.59970800  |
| C  | -6.31722700 | -1.40587300 | 1.15769500  |
| C  | -7.05662700 | -2.02687400 | 2.17491400  |

|   |              |             |             |
|---|--------------|-------------|-------------|
| C | -8.25900200  | -1.47478700 | 2.61718100  |
| C | -8.75176300  | -0.30083600 | 2.04567300  |
| C | -9.25196600  | 1.11490600  | -1.05101900 |
| C | -9.56393000  | 2.39236400  | 1.09190200  |
| C | -3.54139200  | 0.92245700  | -2.93823600 |
| C | -4.58698300  | 1.33811500  | -3.77378200 |
| C | -4.61981400  | 0.95037400  | -5.11610100 |
| C | -3.60384900  | 0.15336300  | -5.64367900 |
| C | -2.55295400  | -0.26126200 | -4.82061800 |
| C | -2.52705100  | 0.11206900  | -3.47738000 |
| C | -2.14436500  | 2.70626400  | -1.13400400 |
| C | -1.69030100  | 3.16038400  | 0.11638900  |
| C | -0.73319400  | 4.17095000  | 0.20539600  |
| C | -0.19924600  | 4.73681400  | -0.95677100 |
| C | -0.63524000  | 4.28662000  | -2.20342500 |
| C | -1.60399600  | 3.28161900  | -2.29271500 |
| C | -4.33231700  | -3.40834800 | 1.69608300  |
| C | -3.94929200  | -3.09591500 | 3.01321600  |
| C | -3.64355500  | -4.10313500 | 3.92725100  |
| C | -3.69342900  | -5.44424300 | 3.53522100  |
| C | -4.05884600  | -5.76599500 | 2.22851400  |
| C | -4.38179100  | -4.75696600 | 1.31575300  |
| C | -5.14726900  | -2.85896100 | -1.03713500 |
| C | -6.39948900  | -3.46631700 | -1.22456900 |
| C | -6.69920400  | -4.11481400 | -2.42341500 |
| C | -5.75361000  | -4.16455800 | -3.45071000 |
| C | -4.50776700  | -3.56042100 | -3.27585300 |
| C | -4.20805200  | -2.90981600 | -2.07747400 |
| H | -4.10578700  | 4.31126400  | -1.25306400 |
| H | -6.15285900  | 5.56686400  | -0.68365700 |
| H | -8.18035500  | 4.38307400  | 0.06231900  |
| H | -6.68467200  | -2.93711100 | 2.63200700  |
| H | -8.81701600  | -1.96380100 | 3.41044900  |
| H | -9.68943900  | 0.10861500  | 2.40558700  |
| H | -9.59386700  | 1.98162300  | -1.62822400 |
| H | -10.12050400 | 0.48899800  | -0.81686100 |
| H | -8.57109300  | 0.53207100  | -1.67886800 |
| H | -9.12577700  | 2.74924200  | 2.03006200  |
| H | -10.44431700 | 1.78798300  | 1.32975000  |
| H | -9.92569200  | 3.25708400  | 0.52770100  |
| H | -5.37855600  | 1.96783500  | -3.38035900 |
| H | -5.44056500  | 1.27705300  | -5.74895400 |
| H | -3.62978500  | -0.14406600 | -6.68843800 |
| H | -1.75646000  | -0.88114100 | -5.22490400 |
| H | -1.71166500  | -0.21826300 | -2.83859700 |
| H | -2.09609400  | 2.71903600  | 1.02380500  |
| H | -0.39981200  | 4.51986400  | 1.17923100  |
| H | 0.53815400   | 5.53109200  | -0.88264500 |
| H | -0.23302700  | 4.72533600  | -3.11315400 |
| H | -1.94304700  | 2.95303500  | -3.26993800 |
| H | -3.89799900  | -2.05525700 | 3.32468400  |
| H | -3.36214600  | -3.84217200 | 4.94420600  |
| H | -3.44940000  | -6.23025000 | 4.24466200  |
| H | -4.10238900  | -6.80569300 | 1.91487200  |
| H | -4.67694400  | -5.02628400 | 0.30707500  |
| H | -7.14355600  | -3.43182400 | -0.43412000 |
| H | -7.67296600  | -4.57877400 | -2.55595900 |
| H | -5.99104700  | -4.66596900 | -4.38509000 |
| H | -3.77358600  | -3.58033900 | -4.07658400 |
| H | -3.24672800  | -2.41974200 | -1.94878400 |

1'

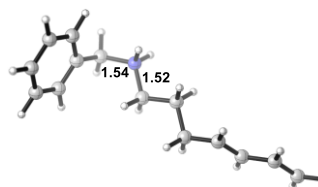

|   |             |             |             |
|---|-------------|-------------|-------------|
| C | 6.04485600  | -0.53070900 | 0.52098600  |
| H | 5.97412700  | -0.99180900 | 1.50582800  |
| C | 7.24630600  | -0.18414700 | 0.03663900  |
| H | 7.35643300  | 0.27473600  | -0.94341200 |
| H | 8.15846500  | -0.35033600 | 0.60085800  |
| C | 4.79469500  | -0.33102500 | -0.19817900 |
| H | 4.87392100  | 0.12504400  | -1.18671600 |
| C | 3.58283200  | -0.67609700 | 0.26855100  |
| H | 3.50258700  | -1.14037100 | 1.25249900  |
| C | 2.29398400  | -0.47347400 | -0.47905900 |
| H | 1.76877200  | -1.43387000 | -0.59309700 |
| H | 2.50315400  | -0.10290100 | -1.49052000 |
| C | 1.35246600  | 0.51718300  | 0.24524200  |
| H | 1.17056800  | 0.16106700  | 1.26900400  |
| H | 1.85336000  | 1.49115500  | 0.32553500  |
| C | 0.02413500  | 0.66301000  | -0.49165200 |
| H | 0.15684800  | 1.04864300  | -1.50667600 |
| H | -0.52574000 | -0.27917000 | -0.54385100 |
| N | -0.89179300 | 1.64661200  | 0.21417700  |
| H | -0.42125400 | 2.55849600  | 0.25840700  |
| C | -2.29340700 | 1.82306800  | -0.39909000 |
| H | -2.70663000 | 2.71346000  | 0.08309600  |
| H | -2.12930400 | 2.03838400  | -1.45727700 |
| C | -3.14374900 | 0.60639900  | -0.17261500 |
| C | -3.31417800 | -0.34884900 | -1.18527600 |
| C | -3.77203100 | 0.41808500  | 1.06892800  |
| C | -4.09389100 | -1.48285100 | -0.95486000 |
| H | -2.85485000 | -0.19805500 | -2.15952100 |
| C | -4.54506500 | -0.71904400 | 1.29888900  |
| H | -3.68014500 | 1.17119900  | 1.85013700  |
| C | -4.70473800 | -1.67007400 | 0.28712300  |
| H | -4.23026700 | -2.21364000 | -1.74596800 |
| H | -5.03462300 | -0.85526600 | 2.25820500  |
| H | -5.31516700 | -2.55050300 | 0.46341100  |
| H | -1.01100900 | 1.33860000  | 1.18705700  |

CP10

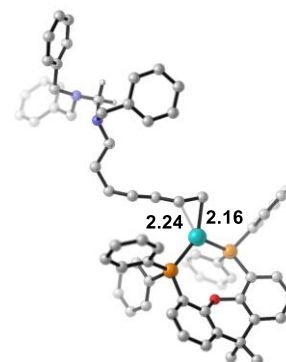

|   |            |             |            |
|---|------------|-------------|------------|
| N | 7.79617100 | -0.05182300 | 0.89969300 |
| C | 6.83126100 | 0.71014600  | 0.09979300 |
| C | 7.18207300 | -0.81026000 | 1.99290400 |
| C | 8.17303500 | -1.21912300 | 3.06887800 |
| C | 8.22831000 | -2.53858600 | 3.53140300 |
| C | 9.10835700 | -2.90402700 | 4.55367800 |
| C | 9.94976200 | -1.94904800 | 5.12470300 |

|    |             |             |             |   |              |             |             |
|----|-------------|-------------|-------------|---|--------------|-------------|-------------|
| C  | 9.90566800  | -0.62838000 | 4.66756500  | C | -6.09743100  | -3.26621500 | -3.01963800 |
| C  | 9.02427100  | -0.26768900 | 3.64938700  | C | -7.20129700  | -2.56005500 | -2.53941600 |
| C  | 8.68566300  | -0.88853600 | 0.08701700  | C | -7.05885700  | -1.62422100 | -1.51089700 |
| C  | 9.62098900  | -0.09158700 | -0.80443900 | C | -5.76972400  | -1.41814700 | -1.00020000 |
| C  | 10.27663400 | 1.05197200  | -0.32609800 | C | -8.21595900  | -0.85010700 | -0.86553200 |
| C  | 11.16716500 | 1.75459000  | -1.13806000 | C | -7.68294500  | 0.54021600  | -0.49614100 |
| C  | 11.42225300 | 1.32322700  | -2.44302100 | C | -6.36721100  | 0.62673900  | -0.02727500 |
| C  | 10.77729700 | 0.18523500  | -2.92907700 | C | -5.77157000  | 1.82058800  | 0.40594600  |
| C  | 9.88157700  | -0.51265200 | -2.11460100 | C | -6.56336600  | 2.97789900  | 0.36715800  |
| H  | 6.29273600  | 1.37037500  | 0.79311800  | C | -7.87547700  | 2.92949200  | -0.10470300 |
| H  | 7.41271000  | 1.35314600  | -0.56423300 | C | -8.42877800  | 1.72305400  | -0.53570800 |
| H  | 6.42323600  | -0.15712300 | 2.44505000  | C | -8.62839500  | -1.58137200 | 0.44484600  |
| H  | 6.64729400  | -1.70756400 | 1.63200200  | C | -9.44194600  | -0.77019700 | -1.79051800 |
| H  | 7.57637200  | -3.28724800 | 3.08598400  | C | -2.73407000  | -2.75109300 | 0.62507900  |
| H  | 9.13863200  | -3.93458900 | 4.89826800  | C | -3.71803400  | -3.64512300 | 1.06821600  |
| H  | 10.63719700 | -2.22995300 | 5.91835100  | C | -3.50053100  | -4.43698800 | 2.19933800  |
| H  | 10.55889600 | 0.12098200  | 5.10770700  | C | -2.29395300  | -4.35537200 | 2.89435500  |
| H  | 8.99113400  | 0.75625900  | 3.28757900  | C | -1.30339200  | -3.47159800 | 2.45638500  |
| H  | 9.28785900  | -1.48381100 | 0.78455600  | C | -1.52425800  | -2.66865500 | 1.33796600  |
| H  | 8.11174300  | -1.60443600 | -0.52629400 | C | -1.87104700  | -2.41982200 | -2.11723900 |
| H  | 10.07012100 | 1.38815700  | 0.68558400  | C | -1.61323300  | -1.68495200 | -3.28697200 |
| H  | 11.66527200 | 2.64049000  | -0.75176300 | C | -0.81390400  | -2.21188100 | -4.30113100 |
| H  | 12.11607000 | 1.87134300  | -3.07509700 | C | -0.24270600  | -3.47942900 | -4.15551800 |
| H  | 10.96495700 | -0.15758800 | -3.94346700 | C | -0.48508400  | -4.21546000 | -2.99517300 |
| H  | 9.37884800  | -1.39785200 | -2.49904000 | C | -1.29754800  | -3.69247700 | -1.98472600 |
| C  | -0.21278600 | 0.87812600  | -1.06902800 | C | -3.66083800  | 3.58939200  | 1.19056800  |
| H  | -0.22379300 | 0.66985300  | -2.13821800 | C | -3.41068900  | 4.37814000  | 0.05335200  |
| C  | -0.73566600 | 2.10044900  | -0.60635300 | C | -3.13307200  | 5.73903200  | 0.17330600  |
| H  | -0.41944700 | 2.50285600  | 0.35518700  | C | -3.07698600  | 6.33396400  | 1.43697600  |
| H  | -1.08546900 | 2.84710600  | -1.31636600 | C | -3.30835300  | 5.55930000  | 2.57345800  |
| C  | 0.72957900  | 0.08034500  | -0.27893000 | C | -3.60416800  | 4.19813300  | 2.45243200  |
| H  | 0.82532500  | 0.36538700  | 0.77197400  | C | -4.11310300  | 1.11618400  | 2.64829500  |
| C  | 1.48748200  | -0.93200000 | -0.74103500 | C | -5.24696500  | 1.29011800  | 3.45796300  |
| H  | 1.39570700  | -1.21901300 | -1.79089100 | C | -5.28047300  | 0.76964700  | 4.75283100  |
| C  | 2.47078300  | -1.72918300 | 0.07450700  | C | -4.18255700  | 0.06782600  | 5.25629100  |
| H  | 2.18829300  | -2.79256900 | 0.04668000  | C | -3.05199000  | -0.11450200 | 4.45831500  |
| H  | 2.41556500  | -1.42154500 | 1.12901700  | C | -3.01932500  | 0.40363600  | 3.16237800  |
| C  | 3.92982400  | -1.61170200 | -0.42037500 | H | -3.97816200  | -3.57896600 | -2.88723900 |
| H  | 4.55165400  | -2.37508000 | 0.06505400  | H | -6.22710900  | -3.99767100 | -3.81241300 |
| H  | 3.95571800  | -1.83375100 | -1.49598100 | H | -8.17899400  | -2.74987400 | -2.96964700 |
| C  | 4.54353900  | -0.23127000 | -0.14910000 | H | -6.14582500  | 3.92409900  | 0.69371200  |
| H  | 3.86030900  | 0.55475600  | -0.50800500 | H | -8.47134800  | 3.83751700  | -0.13464900 |
| H  | 4.61125100  | -0.09706700 | 0.93603800  | H | -9.45166800  | 1.70921900  | -0.89693300 |
| N  | 5.89346600  | -0.08031300 | -0.70360800 | H | -8.98125600  | -2.59453000 | 0.21949200  |
| C  | 5.94214200  | 0.17624800  | -2.15499300 | H | -9.43523800  | -1.03506900 | 0.94702000  |
| H  | 6.97524700  | 0.01470600  | -2.48205300 | H | -7.78532500  | -1.65798400 | 1.13785500  |
| H  | 5.33556300  | -0.59336500 | -2.64628400 | H | -9.20764100  | -0.26628300 | -2.73430600 |
| C  | 5.48439200  | 1.55275100  | -2.62403000 | H | -10.25961300 | -0.22984700 | -1.30365300 |
| C  | 4.12862100  | 1.83067400  | -2.85938700 | H | -9.82201300  | -1.77100800 | -2.01777800 |
| C  | 6.41641000  | 2.58212300  | -2.82773200 | H | -4.65717600  | -3.72959600 | 0.53050500  |
| C  | 3.71435000  | 3.10385000  | -3.25532900 | H | -4.27652800  | -5.12169200 | 2.53210200  |
| H  | 3.38850400  | 1.04305500  | -2.74075700 | H | -2.12512600  | -4.97507500 | 3.77116200  |
| C  | 6.00699500  | 3.85559800  | -3.22718200 | H | -0.35832600  | -3.40344300 | 2.98948800  |
| H  | 7.47612200  | 2.37926900  | -2.68771700 | H | -0.75222900  | -1.97944300 | 1.00445200  |
| C  | 4.65244000  | 4.12209900  | -3.43623900 | H | -2.03741900  | -0.68947100 | -3.39519500 |
| H  | 2.65868100  | 3.29690500  | -3.42837300 | H | -0.62846800  | -1.62947700 | -5.20004800 |
| H  | 6.74701000  | 4.63679000  | -3.38237800 | H | 0.38880300   | -3.88757200 | -4.94025600 |
| H  | 4.33129800  | 5.11262600  | -3.74799700 | H | -0.04467700  | -5.20189400 | -2.87330700 |
| Pd | -2.32146100 | 0.64783000  | -0.36117900 | H | -1.48160900  | -4.27987100 | -1.09063200 |
| P  | -2.94702300 | -1.62542100 | -0.82939100 | H | -3.42901600  | 3.91701800  | -0.93113100 |
| P  | -3.98750600 | 1.78249200  | 0.92430100  | H | -2.94806700  | 6.33257900  | -0.71832200 |
| O  | -5.58956600 | -0.51312000 | 0.02506200  | H | -2.84852500  | 7.39212300  | 1.53311400  |
| C  | -4.63071200 | -2.08627800 | -1.47554600 | H | -3.26284300  | 6.01222600  | 3.56065800  |
| C  | -4.82828800 | -3.03368800 | -2.49278200 | H | -3.78993400  | 3.61188700  | 3.34639400  |

|   |             |             |            |
|---|-------------|-------------|------------|
| H | -6.10824600 | 1.83062100  | 3.07571500 |
| H | -6.16619200 | 0.91029600  | 5.36728800 |
| H | -4.21208300 | -0.34061200 | 6.26314600 |
| H | -2.19988700 | -0.67303600 | 4.83607000 |
| H | -2.14976500 | 0.24229400  | 2.53058000 |

### TS8

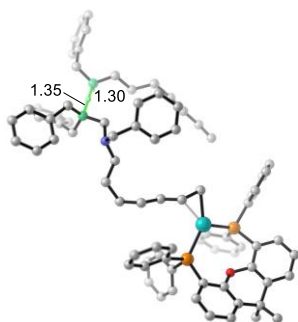

|   |             |             |             |
|---|-------------|-------------|-------------|
| N | 6.52056800  | -1.03995300 | -0.09272500 |
| C | 5.24802900  | -0.56707800 | -0.77397200 |
| C | 6.26493700  | -1.63879700 | 1.26491100  |
| C | 7.37638400  | -1.39396200 | 2.26723100  |
| C | 8.51550600  | -2.21175900 | 2.32047200  |
| C | 9.51543100  | -1.97716200 | 3.26731300  |
| C | 9.38748100  | -0.93072200 | 4.18405600  |
| C | 8.25044700  | -0.11923600 | 4.15256800  |
| C | 7.25493800  | -0.35142600 | 3.20012200  |
| C | 7.43834700  | -1.84626300 | -0.98150400 |
| C | 7.40349400  | -3.36757200 | -0.96272500 |
| C | 6.22546300  | -4.12613000 | -1.02863700 |
| C | 6.28411400  | -5.52000900 | -1.08284800 |
| C | 7.51488600  | -6.17903600 | -1.08471900 |
| C | 8.69350700  | -5.43442900 | -1.02544800 |
| C | 8.63509500  | -4.04142600 | -0.95876800 |
| H | 4.84267100  | 0.19091000  | -0.09595100 |
| H | 5.58887800  | -0.04590200 | -1.67285600 |
| H | 5.34760100  | -1.17701800 | 1.63760600  |
| H | 6.06791500  | -2.70714500 | 1.15157500  |
| H | 8.61106300  | -3.04901300 | 1.63473900  |
| H | 10.38688000 | -2.62484900 | 3.30071200  |
| H | 10.15875400 | -0.76131800 | 4.92979500  |
| H | 8.12728000  | 0.67778000  | 4.88068100  |
| H | 6.35586100  | 0.26300200  | 3.20500200  |
| H | 7.25425600  | -1.47945600 | -1.99795900 |
| H | 8.45817900  | -1.54449900 | -0.72614000 |
| H | 5.26688600  | -3.61755000 | -1.02420000 |
| H | 5.36152100  | -6.09209000 | -1.12711300 |
| H | 7.55524200  | -7.26342500 | -1.13032200 |
| H | 9.65786000  | -5.93434100 | -1.02698200 |
| H | 9.56143500  | -3.47185200 | -0.91589800 |
| C | -1.55352400 | -0.34033700 | -1.42962900 |
| H | -1.74841900 | -0.96463900 | -2.30110100 |
| C | -1.82194800 | 1.04508900  | -1.50659400 |
| H | -1.30967700 | 1.73966900  | -0.84126300 |
| H | -2.15212000 | 1.48123700  | -2.44748600 |
| C | -0.62421100 | -0.90207700 | -0.44737300 |
| H | -0.35532300 | -0.23968700 | 0.38033500  |
| C | -0.07258200 | -2.13138000 | -0.49055300 |
| H | -0.34328800 | -2.80114500 | -1.30892800 |
| C | 0.91136600  | -2.67964700 | 0.50925800  |
| H | 0.57221300  | -3.66238200 | 0.86445800  |
| H | 0.95530700  | -2.02799200 | 1.39397700  |
| C | 2.33475500  | -2.84392900 | -0.07740600 |

|    |              |             |             |
|----|--------------|-------------|-------------|
| H  | 2.95171700   | -3.46945600 | 0.58121300  |
| H  | 2.25696000   | -3.38057000 | -1.03180200 |
| C  | 3.01972300   | -1.48758800 | -0.27841700 |
| H  | 2.30173800   | -0.77239700 | -0.70184900 |
| H  | 3.29575200   | -1.09592100 | 0.70687000  |
| N  | 4.25048000   | -1.54627400 | -1.09961400 |
| C  | 4.00532600   | -1.70531200 | -2.55998600 |
| H  | 4.92687300   | -2.08995200 | -3.01258800 |
| H  | 3.25837200   | -2.49575300 | -2.67112200 |
| C  | 3.55710700   | -0.45523700 | -3.30082100 |
| C  | 2.22106000   | -0.02403800 | -3.26589000 |
| C  | 4.48319600   | 0.30484500  | -4.03284300 |
| C  | 1.83406500   | 1.15148700  | -3.91202200 |
| H  | 1.47089400   | -0.61220700 | -2.74447500 |
| C  | 4.09896600   | 1.47960000  | -4.68402100 |
| H  | 5.51149900   | -0.04336700 | -4.12144700 |
| C  | 2.77225900   | 1.91047200  | -4.61686000 |
| H  | 0.79412300   | 1.46325500  | -3.87216800 |
| H  | 4.82836300   | 2.04544700  | -5.25756300 |
| H  | 2.46711500   | 2.81899000  | -5.12851300 |
| Pd | -3.52385900  | 0.15750500  | -0.53781400 |
| P  | -4.51774900  | -1.92788500 | 0.15542400  |
| P  | -4.87626300  | 2.02100100  | 0.14264400  |
| O  | -6.86288700  | -0.10923200 | 0.40843800  |
| C  | -6.29965100  | -2.34016100 | -0.17083100 |
| C  | -6.72974800  | -3.60552500 | -0.60118300 |
| C  | -8.06423800  | -3.83154600 | -0.93325300 |
| C  | -8.99925000  | -2.79914000 | -0.84201400 |
| C  | -8.62362600  | -1.52955700 | -0.39342100 |
| C  | -7.27624200  | -1.33909300 | -0.05831300 |
| C  | -9.58805700  | -0.35346400 | -0.18879300 |
| C  | -8.81845800  | 0.93160400  | -0.52097900 |
| C  | -7.46762800  | 0.99284200  | -0.16211100 |
| C  | -6.66435300  | 2.12825500  | -0.34070700 |
| C  | -7.27206700  | 3.25898700  | -0.90554500 |
| C  | -8.61331400  | 3.22811500  | -1.28849700 |
| C  | -9.37739700  | 2.07530300  | -1.10131800 |
| C  | -9.99586800  | -0.30660100 | 1.31253400  |
| C  | -10.86110800 | -0.49711900 | -1.04008200 |
| C  | -4.32675100  | -2.26988400 | 1.96404300  |
| C  | -5.35058400  | -2.79168500 | 2.76671700  |
| C  | -5.14250400  | -3.00784500 | 4.13171900  |
| C  | -3.90658700  | -2.71739500 | 4.70981200  |
| C  | -2.87699100  | -2.20279500 | 3.91705100  |
| C  | -3.08794800  | -1.97150300 | 2.55815900  |
| C  | -3.68922800  | -3.39346000 | -0.62818200 |
| C  | -3.53353200  | -3.38001000 | -2.02527900 |
| C  | -2.91631700  | -4.44126800 | -2.68644600 |
| C  | -2.42638200  | -5.53046200 | -1.95890700 |
| C  | -2.56745700  | -5.55088600 | -0.57113000 |
| C  | -3.19905700  | -4.49269800 | 0.09022900  |
| C  | -4.25584300  | 3.67070100  | -0.43787600 |
| C  | -3.99961000  | 3.82475900  | -1.81215700 |
| C  | -3.52207500  | 5.03172300  | -2.32131700 |
| C  | -3.27139000  | 6.10509900  | -1.46110800 |
| C  | -3.50834400  | 5.96047200  | -0.09356300 |
| C  | -4.00137800  | 4.75431700  | 0.41501200  |
| C  | -4.96298000  | 2.23159600  | 1.97976800  |
| C  | -6.00713000  | 2.91562700  | 2.62247900  |
| C  | -6.01512700  | 3.05331900  | 4.01159800  |
| C  | -4.98090500  | 2.51013200  | 4.77735200  |
| C  | -3.93911700  | 1.82646100  | 4.14840200  |
| C  | -3.93234900  | 1.68604400  | 2.75956900  |
| H  | -6.01176500  | -4.41275000 | -0.69380000 |

|   |              |             |             |
|---|--------------|-------------|-------------|
| H | -8.37727200  | -4.81522800 | -1.27126600 |
| H | -10.03025200 | -2.99426200 | -1.11691500 |
| H | -6.69147400  | 4.16211900  | -1.05807900 |
| H | -9.06738200  | 4.10948500  | -1.73232700 |
| H | -10.41891800 | 2.07690600  | -1.40438700 |
| H | -10.51951500 | -1.22791600 | 1.59223400  |
| H | -10.66324200 | 0.54282700  | 1.49771900  |
| H | -9.12023500  | -0.20038700 | 1.96006700  |
| H | -10.63328800 | -0.53607000 | -2.11062300 |
| H | -11.54171700 | 0.34076100  | -0.86158800 |
| H | -11.40991600 | -1.40443300 | -0.77014100 |
| H | -6.31410900  | -3.03236600 | 2.32874700  |
| H | -5.94880200  | -3.40788700 | 4.74079000  |
| H | -3.74609000  | -2.88929300 | 5.77078800  |
| H | -1.91046900  | -1.97485700 | 4.35998100  |
| H | -2.28781600  | -1.56280000 | 1.94598900  |
| H | -3.90066500  | -2.53050600 | -2.59650500 |
| H | -2.81503300  | -4.41752700 | -3.76850400 |
| H | -1.94238000  | -6.35721300 | -2.47219000 |
| H | -2.19518000  | -6.39603900 | 0.00247100  |
| H | -3.31220400  | -4.52936800 | 1.16896000  |
| H | -4.18042600  | 2.99065800  | -2.48553400 |
| H | -3.34192300  | 5.13396500  | -3.38835700 |
| H | -2.89578200  | 7.04553400  | -1.85528000 |
| H | -3.32186100  | 6.79081000  | 0.58290400  |
| H | -4.19301400  | 4.66459800  | 1.47926300  |
| H | -6.81768400  | 3.34097000  | 2.03811000  |
| H | -6.83173900  | 3.58272400  | 4.49550000  |
| H | -4.99205800  | 2.61345200  | 5.85914700  |
| H | -3.13951900  | 1.38657200  | 4.73837500  |
| H | -3.13383900  | 1.13455100  | 2.27069200  |
| H | 7.74926400   | 1.46068600  | 1.25046900  |
| C | 1.63186800   | 4.84864500  | -0.17117600 |
| H | 1.75866300   | 5.48552000  | 0.70470400  |
| C | 0.39960800   | 4.62449000  | -0.65238400 |
| H | 0.23669900   | 3.99887300  | -1.52729500 |
| H | -0.48599700  | 5.05705500  | -0.19795500 |
| C | 2.84592500   | 4.29414700  | -0.75449000 |
| H | 2.71302700   | 3.65686700  | -1.63095400 |
| C | 4.08828700   | 4.51977700  | -0.29395500 |
| H | 4.22428300   | 5.15973900  | 0.57964500  |
| C | 5.33540200   | 3.93316000  | -0.89534000 |
| H | 6.04069700   | 4.73484400  | -1.16235500 |
| H | 5.08258300   | 3.40918300  | -1.82639800 |
| C | 6.04383500   | 2.95065500  | 0.06189500  |
| H | 6.31978300   | 3.47045300  | 0.99022800  |
| H | 5.33204000   | 2.16526600  | 0.34243800  |
| C | 7.29794200   | 2.34046100  | -0.56546700 |
| H | 7.07976500   | 1.92697000  | -1.55696700 |
| H | 8.06433200   | 3.11187800  | -0.69064900 |
| N | 7.86079500   | 1.22533500  | 0.25996600  |
| H | 7.19299000   | 0.12122700  | 0.09530400  |
| C | 9.33213700   | 0.97760100  | 0.03290500  |
| H | 9.57459900   | 0.07550000  | 0.60264400  |
| H | 9.45342500   | 0.75470900  | -1.03140300 |
| C | 10.22052600  | 2.12710300  | 0.44956300  |
| C | 10.79140400  | 2.98031700  | -0.50426600 |
| C | 10.48420300  | 2.35291500  | 1.80908600  |
| C | 11.60134500  | 4.04691600  | -0.10859000 |
| H | 10.61336700  | 2.80309100  | -1.56273800 |
| C | 11.28911400  | 3.42054900  | 2.20525900  |
| H | 10.07268200  | 1.67977500  | 2.55884200  |
| C | 11.84775300  | 4.27048700  | 1.24677800  |
| H | 12.04173200  | 4.69762700  | -0.85835300 |

|   |             |            |            |
|---|-------------|------------|------------|
| H | 11.49113800 | 3.58307800 | 3.26010300 |
| H | 12.47975900 | 5.09785900 | 1.55586200 |

### CP11

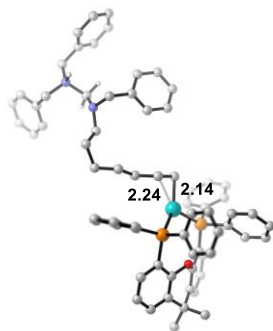

|   |              |             |             |
|---|--------------|-------------|-------------|
| N | -8.25979300  | -0.99906100 | 0.01289600  |
| C | -6.95483400  | -0.17476300 | -0.30963800 |
| C | -8.14585700  | -2.47824600 | -0.36905600 |
| C | -8.25354700  | -2.75896600 | -1.84637900 |
| C | -9.50284100  | -3.01335900 | -2.43441500 |
| C | -9.60426900  | -3.28897000 | -3.79767200 |
| C | -8.45508500  | -3.32544900 | -4.59079700 |
| C | -7.20423200  | -3.09997900 | -4.01322200 |
| C | -7.10411200  | -2.82384800 | -2.64913600 |
| C | -9.52544000  | -0.32690600 | -0.49498100 |
| C | -9.85520700  | 0.92570300  | 0.27797300  |
| C | -10.29720400 | 0.83428000  | 1.60741300  |
| C | -10.60694500 | 1.98634900  | 2.32986400  |
| C | -10.49332700 | 3.24104400  | 1.72433400  |
| C | -10.06973100 | 3.33976900  | 0.39749800  |
| C | -9.74822500  | 2.18706700  | -0.32180800 |
| H | -6.76334200  | -0.36459200 | -1.36609200 |
| H | -7.26574900  | 0.86517600  | -0.17241100 |
| H | -7.18350200  | -2.78979800 | 0.04282100  |
| H | -8.94151900  | -2.98323300 | 0.18630000  |
| H | -10.40164100 | -3.01827800 | -1.82218700 |
| H | -10.57718300 | -3.48841600 | -4.23666500 |
| H | -8.53303900  | -3.54631300 | -5.65113400 |
| H | -6.30525100  | -3.15209500 | -4.62002900 |
| H | -6.12321000  | -2.68718100 | -2.20236400 |
| H | -9.37423700  | -0.13181500 | -1.55802500 |
| H | -10.32152900 | -1.07030400 | -0.40012200 |
| H | -10.42583800 | -0.14031300 | 2.07703300  |
| H | -10.95138300 | 1.90489600  | 3.35635200  |
| H | -10.74471000 | 4.13741100  | 2.28329500  |
| H | -9.99173900  | 4.31182000  | -0.08000000 |
| H | -9.42240900  | 2.26909200  | -1.35593000 |
| C | -0.08994600  | 0.38164000  | 0.92531600  |
| H | -0.08621900  | 0.34295900  | 2.01502000  |
| C | 0.30606300   | 1.57760500  | 0.28352500  |
| H | -0.03790700  | 1.79206600  | -0.72766300 |
| H | 0.53624700   | 2.46256600  | 0.87493000  |
| C | -0.94469800  | -0.60185000 | 0.26372900  |
| H | -1.00384500  | -0.51915000 | -0.82475500 |
| C | -1.67111100  | -1.55960700 | 0.87393800  |
| H | -1.60932900  | -1.65624500 | 1.95990000  |
| C | -2.58369500  | -2.53561000 | 0.18092100  |
| H | -2.31438100  | -3.56342000 | 0.46098100  |
| H | -2.45330800  | -2.46665600 | -0.90867500 |
| C | -4.07367600  | -2.31883000 | 0.53847400  |
| H | -4.67326200  | -3.18181000 | 0.21438200  |
| H | -4.16957200  | -2.27152800 | 1.63117900  |
| C | -4.63440300  | -1.03576300 | -0.08705800 |

|   |             |             |             |
|---|-------------|-------------|-------------|
| H | -3.88576900 | -0.23861600 | -0.01846900 |
| H | -4.80989200 | -1.19309000 | -1.15699400 |
| N | -5.90270400 | -0.58608200 | 0.52880200  |
| H | -8.30694500 | -0.98500300 | 1.03713500  |
| C | -5.75098900 | 0.18061900  | 1.79553100  |
| H | -6.71732200 | 0.16758500  | 2.31800700  |
| H | -5.05772000 | -0.38740000 | 2.42205300  |
| C | -5.27742000 | 1.61384200  | 1.64168300  |
| C | -3.90920000 | 1.91282800  | 1.54361900  |
| C | -6.20276000 | 2.66729600  | 1.58956800  |
| C | -3.48112000 | 3.22892500  | 1.36467800  |
| H | -3.17008300 | 1.11925500  | 1.61682900  |
| C | -5.77481900 | 3.98498800  | 1.41445100  |
| H | -7.26460200 | 2.46342700  | 1.71469300  |
| C | -4.41303700 | 4.26715300  | 1.29455800  |
| H | -2.41808000 | 3.43825900  | 1.28790800  |
| H | -6.50394600 | 4.79005300  | 1.38388300  |
| H | -4.07825100 | 5.29202400  | 1.16183800  |
| C | 5.56981600  | 0.14185000  | -1.84755000 |
| C | 6.52740500  | -0.39341500 | -2.71630500 |
| C | 6.70362000  | 0.24718100  | -3.94721000 |
| C | 5.96087900  | 1.38267900  | -4.27477600 |
| C | 5.02280000  | 1.89706400  | -3.37956000 |
| C | 4.80031700  | 1.27569700  | -2.14184400 |
| H | 7.43011100  | -0.13213800 | -4.65795000 |
| H | 6.11732300  | 1.87167500  | -5.23209600 |
| H | 4.45080300  | 2.77837200  | -3.64867200 |
| C | 7.34690600  | -1.59189100 | -2.22124300 |
| C | 7.98452000  | -2.37293600 | -3.38248600 |
| H | 8.58529000  | -3.20619300 | -3.00574500 |
| H | 7.22994000  | -2.77191500 | -4.06872500 |
| H | 8.66506400  | -1.73238600 | -3.95131900 |
| C | 8.48119300  | -1.06184500 | -1.29635900 |
| H | 9.06685900  | -1.89797300 | -0.89744800 |
| H | 9.15291000  | -0.40357100 | -1.85891300 |
| H | 8.07530700  | -0.49458400 | -0.45338600 |
| C | 6.40782800  | -2.47048700 | -1.38402600 |
| C | 6.47941700  | -3.86435500 | -1.30817700 |
| C | 5.44211600  | -1.83155700 | -0.59441100 |
| C | 5.62958600  | -4.57792900 | -0.46206200 |
| H | 7.20814100  | -4.40376600 | -1.90365200 |
| C | 4.54730300  | -2.51477300 | 0.24309400  |
| C | 4.67677700  | -3.91162100 | 0.30628200  |
| H | 5.70848900  | -5.65976000 | -0.40416100 |
| H | 4.01706400  | -4.48369000 | 0.94830800  |
| O | 5.34994000  | -0.45581600 | -0.62247500 |
| P | 3.55144700  | 1.83604300  | -0.88909700 |
| P | 3.21454700  | -1.57381000 | 1.14059600  |
| C | 4.60851700  | 2.80690600  | 0.27980900  |
| C | 5.73536200  | 3.53170100  | -0.14213000 |
| C | 4.27076700  | 2.81426200  | 1.64088700  |
| C | 6.49682900  | 4.25520300  | 0.77638600  |
| H | 6.02229000  | 3.52761900  | -1.18968900 |
| C | 5.03334600  | 3.53829900  | 2.55983700  |
| H | 3.41875400  | 2.23113100  | 1.97867000  |
| C | 6.14627300  | 4.26139400  | 2.12904000  |
| H | 7.36680900  | 4.81069000  | 0.43610800  |
| H | 4.76445200  | 3.52305900  | 3.61247200  |
| H | 6.74407200  | 4.82102800  | 2.84349900  |
| C | 2.64746100  | 3.13839700  | -1.85126100 |
| C | 1.75095700  | 2.70921700  | -2.84705500 |
| C | 2.76410100  | 4.51300800  | -1.60388300 |
| C | 1.01294200  | 3.62946200  | -3.58964000 |
| H | 1.63520700  | 1.64502600  | -3.04073300 |

|    |             |             |             |
|----|-------------|-------------|-------------|
| C  | 2.01100400  | 5.43512100  | -2.33804800 |
| H  | 3.44673100  | 4.87099100  | -0.84034600 |
| C  | 1.13909900  | 4.99866700  | -3.33487400 |
| H  | 0.33586000  | 3.27867600  | -4.36444700 |
| H  | 2.11551900  | 6.49711900  | -2.13151200 |
| H  | 0.56076100  | 5.71725400  | -3.90943100 |
| C  | 4.05337900  | -1.05361600 | 2.70821300  |
| C  | 5.38431300  | -1.36857800 | 3.01416300  |
| C  | 3.31360400  | -0.28899400 | 3.62773300  |
| C  | 5.96313100  | -0.92638700 | 4.20707400  |
| H  | 5.97402200  | -1.96285700 | 2.32353400  |
| C  | 3.88673400  | 0.13784900  | 4.82521800  |
| H  | 2.28232300  | -0.03069800 | 3.40017400  |
| C  | 5.21736200  | -0.17594900 | 5.11608000  |
| H  | 6.99819800  | -1.17539300 | 4.42543300  |
| H  | 3.29694700  | 0.72029300  | 5.52858100  |
| H  | 5.66811500  | 0.16251900  | 6.04507400  |
| C  | 2.15403600  | -2.98932900 | 1.70242000  |
| C  | 2.22574000  | -3.56003800 | 2.98217800  |
| C  | 1.25090500  | -3.53219600 | 0.77343000  |
| C  | 1.42061300  | -4.65113800 | 3.32097600  |
| H  | 2.91863500  | -3.16128500 | 3.71606000  |
| C  | 0.46753700  | -4.63842500 | 1.10350100  |
| H  | 1.16843700  | -3.08729100 | -0.21462900 |
| C  | 0.54652500  | -5.19900200 | 2.38098700  |
| H  | 1.49049900  | -5.08104300 | 4.31684500  |
| H  | -0.20655300 | -5.06153400 | 0.36291100  |
| H  | -0.06703200 | -6.05769600 | 2.64084600  |
| Pd | 2.04350200  | 0.33211500  | 0.23180100  |

**TS9**

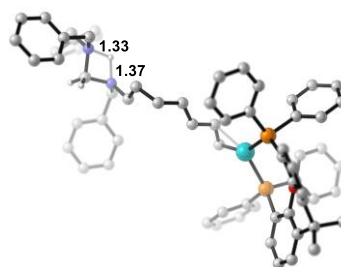

|   |              |             |             |
|---|--------------|-------------|-------------|
| N | -7.63141900  | -0.96059400 | 0.55866100  |
| C | -7.09264200  | -0.11380500 | -0.56564500 |
| C | -7.57024800  | -2.45371300 | 0.32113600  |
| C | -8.49132200  | -2.97836900 | -0.75883400 |
| C | -9.81029700  | -3.35644900 | -0.46294500 |
| C | -10.65503000 | -3.83642900 | -1.46412600 |
| C | -10.19036400 | -3.95321900 | -2.77602100 |
| C | -8.87394400  | -3.60182800 | -3.07993700 |
| C | -8.03046400  | -3.12290500 | -2.07654800 |
| C | -8.97219900  | -0.56023500 | 1.11547400  |
| C | -9.03746000  | 0.83155500  | 1.69282400  |
| C | -8.44895500  | 1.11204800  | 2.93585900  |
| C | -8.52858900  | 2.39186300  | 3.48402400  |
| C | -9.20715700  | 3.40544900  | 2.80023700  |
| C | -9.81189100  | 3.13239100  | 1.57223000  |
| C | -9.72886200  | 1.84995900  | 1.02285300  |
| H | -6.85727000  | -0.70646100 | -1.44694700 |
| H | -7.77112100  | 0.69508100  | -0.82782800 |
| H | -6.53177300  | -2.68922100 | 0.08669100  |
| H | -7.79931300  | -2.91012500 | 1.28827000  |
| H | -10.17483200 | -3.29580400 | 0.55959900  |
| H | -11.67098800 | -4.13036800 | -1.21736500 |
| H | -10.84626700 | -4.33231100 | -3.55409900 |

|   |              |             |             |    |             |             |             |
|---|--------------|-------------|-------------|----|-------------|-------------|-------------|
| H | -8.49912900  | -3.71350700 | -4.09311600 | C  | 5.22790200  | -4.46739800 | -1.85920500 |
| H | -6.99593600  | -2.88849500 | -2.31863600 | H  | 6.91775100  | -4.00664800 | -3.09721000 |
| H | -9.72135800  | -0.69132600 | 0.32854900  | C  | 4.30588600  | -2.64743700 | -0.53138200 |
| H | -9.18658700  | -1.29584900 | 1.89628900  | C  | 4.28922800  | -3.98890700 | -0.94719300 |
| H | -7.93489800  | 0.32335100  | 3.48140000  | H  | 5.19445500  | -5.50687700 | -2.17267100 |
| H | -8.07364100  | 2.59629400  | 4.44876800  | H  | 3.52662400  | -4.65933800 | -0.56784800 |
| H | -9.27487200  | 4.40005600  | 3.23082500  | O  | 5.38360900  | -0.53513800 | -0.59241500 |
| H | -10.35700600 | 3.91129200  | 1.04725200  | P  | 3.88202400  | 1.91732600  | -0.07422500 |
| H | -10.22267700 | 1.63522900  | 0.07739900  | P  | 3.00392500  | -1.91050100 | 0.57770600  |
| C | -0.02756300  | 0.42002900  | 0.98792700  | C  | 4.96236700  | 2.22838000  | 1.39550500  |
| H | -0.10579900  | 0.03982100  | 2.00686400  | C  | 6.22944700  | 2.82573700  | 1.29309900  |
| C | 0.53814700   | 1.70001300  | 0.78201600  | C  | 4.49274800  | 1.85276500  | 2.66267300  |
| H | 0.29288600   | 2.26523100  | -0.11687000 | C  | 7.00223800  | 3.04712500  | 2.43387000  |
| H | 0.80681200   | 2.31860100  | 1.63654300  | H  | 6.61639400  | 3.11512300  | 0.32039600  |
| C | -0.93351700  | -0.18822200 | 0.01911200  | C  | 5.26573000  | 2.07585800  | 3.80370400  |
| H | -0.91001200  | 0.24395700  | -0.98499900 | H  | 3.52538400  | 1.36586700  | 2.74731200  |
| C | -1.79309900  | -1.19894400 | 0.25899600  | C  | 6.52159400  | 2.67395900  | 3.69155500  |
| H | -1.81708300  | -1.64998200 | 1.25296800  | H  | 7.98197000  | 3.50797100  | 2.33945700  |
| C | -2.74342400  | -1.77602700 | -0.75308900 | H  | 4.89121100  | 1.76823700  | 4.77618300  |
| H | -2.59981800  | -2.86205600 | -0.83553100 | H  | 7.12737700  | 2.84267600  | 4.57782500  |
| H | -2.53556700  | -1.35766900 | -1.74768000 | C  | 3.23196000  | 3.60046900  | -0.50131700 |
| C | -4.23530900  | -1.52939000 | -0.40327400 | C  | 2.34731500  | 3.70526100  | -1.59030900 |
| H | -4.86025200  | -2.07738400 | -1.12073500 | C  | 3.53381000  | 4.75847400  | -0.28733300 |
| H | -4.43745400  | -1.93773800 | 0.59662300  | C  | 1.80087500  | 4.93580100  | -1.95176800 |
| C | -4.54832700  | -0.03499600 | -0.42227400 | H  | 2.08926600  | 2.81495000  | -2.15962300 |
| H | -3.78968100  | 0.46816500  | 0.18242700  | C  | 2.97134100  | 5.98949600  | -0.12374900 |
| H | -4.46588300  | 0.36416200  | -1.43985200 | H  | 4.21280000  | 4.70610000  | 1.07340300  |
| N | -5.86951000  | 0.37817300  | 0.14759600  | C  | 2.10920200  | 6.08383300  | -1.21556300 |
| H | -6.51546700  | -0.42353000 | 1.04739800  | H  | 1.13158400  | 4.99885800  | -2.80620000 |
| C | -5.88138700  | 1.85558300  | 0.47653800  | H  | 3.21671900  | 6.87585900  | 0.45540200  |
| H | -6.82081700  | 2.05671800  | 0.99244300  | H  | 1.67956900  | 7.04287300  | -1.49223100 |
| H | -5.07176200  | 1.99350100  | 1.19825900  | C  | 3.72584500  | -2.12486500 | 2.26976300  |
| C | -5.71336900  | 2.78291400  | -0.70845300 | C  | 4.92307400  | -2.81035700 | 2.51885400  |
| C | -4.43824200  | 3.16889500  | -1.14997700 | C  | 3.03344000  | -1.56148500 | 3.35572500  |
| C | -6.83847400  | 3.29576500  | -1.37188400 | C  | 5.41663700  | -2.92756400 | 3.82100400  |
| C | -4.29271500  | 4.02052700  | -2.24540600 | H  | 5.47481900  | -3.25595700 | 1.69719800  |
| H | -3.55328200  | 2.81694400  | -0.62570800 | C  | 3.51855000  | -1.69217900 | 4.65677700  |
| C | -6.69464000  | 4.14560400  | -2.46970300 | H  | 2.11075100  | -1.01615400 | 3.17288500  |
| H | -7.83477200  | 3.05785600  | -1.00626500 | C  | 4.71602100  | -2.37291600 | 4.89245200  |
| C | -5.42037100  | 4.50449600  | -2.91239300 | H  | 6.34930800  | -3.45738000 | 3.99544800  |
| H | -3.29879300  | 4.31417600  | -2.57027400 | H  | 2.96626200  | -1.25636800 | 5.48554800  |
| H | -7.57593400  | 4.53851400  | -2.96868800 | H  | 5.10045100  | -2.46805500 | 5.90432700  |
| H | -5.30654700  | 5.17098200  | -3.76238900 | C  | 1.73622900  | -3.26512800 | 0.50232600  |
| C | 5.75252700   | 0.41536100  | -1.52322700 | C  | 1.55423700  | -4.22269600 | 1.51086200  |
| C | 6.70300700   | 0.09605400  | -2.49886100 | C  | 0.93238400  | -3.33919600 | -0.64772500 |
| C | 7.02921800   | 1.09335600  | -3.42392300 | C  | 0.59920100  | -5.23387500 | 1.36853100  |
| C | 6.43921900   | 2.35620600  | -3.35136700 | H  | 2.16663000  | -4.19021800 | 2.40622500  |
| C | 5.50836100   | 2.64648300  | -2.35350200 | C  | -0.00081600 | -4.36417600 | -0.80142100 |
| C | 5.13613500   | 1.66987900  | -1.41803200 | H  | 1.04988100  | -2.59552300 | -1.43191600 |
| H | 7.75568000   | 0.89300800  | -4.20413400 | C  | -0.17375300 | -5.31389400 | 0.20957800  |
| H | 6.71167500   | 3.12084900  | -4.07321100 | H  | 0.47463600  | -5.96907600 | 2.15942600  |
| H | 5.06087200   | 3.63331500  | -2.30829500 | H  | -0.59265100 | -4.42184300 | -1.71170000 |
| C | 7.35795000   | -1.28951800 | -2.43020400 | H  | -0.90130800 | -6.11285000 | 0.09201100  |
| C | 7.98269600   | -1.69829800 | -3.77509300 | Pd | 2.12731700  | 0.33443000  | 0.37644300  |
| H | 8.46922600   | -2.67506600 | -3.69614300 |    |             |             |             |
| H | 7.23513000   | -1.74710600 | -4.57401900 |    |             |             |             |
| H | 8.76038900   | -0.98838600 | -4.07225300 |    |             |             |             |
| C | 8.47978300   | -1.24867300 | -1.35216600 |    |             |             |             |
| H | 8.94888900   | -2.23453600 | -1.25581500 |    |             |             |             |
| H | 9.25075700   | -0.52278200 | -1.63447000 |    |             |             |             |
| H | 8.08225500   | -0.96147600 | -0.37405000 |    |             |             |             |
| C | 6.27955700   | -2.28118900 | -1.97340100 |    |             |             |             |
| C | 6.20501000   | -3.61681600 | -2.37836700 |    |             |             |             |
| C | 5.32954600   | -1.83653500 | -1.04359900 |    |             |             |             |

### CP12

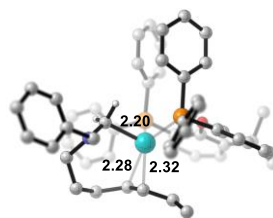

|   |             |             |             |
|---|-------------|-------------|-------------|
| C | 3.39229700  | 0.19015100  | -0.49751800 |
| C | 4.61360100  | -0.22313700 | -1.04044000 |
| C | 5.44638800  | 0.77375100  | -1.56263800 |
| C | 5.08158000  | 2.11930400  | -1.51322600 |
| C | 3.86301400  | 2.49976000  | -0.95220200 |
| C | 2.98083200  | 1.53344100  | -0.44811400 |
| H | 6.40177100  | 0.50508000  | -1.99935600 |
| H | 5.75416600  | 2.87567900  | -1.90632700 |
| H | 3.59595800  | 3.54966700  | -0.91221300 |
| C | 5.00141100  | -1.70427900 | -0.94174000 |
| C | 5.99869700  | -2.10661600 | -2.04435900 |
| H | 6.28891900  | -3.15605100 | -1.94311300 |
| H | 5.58113300  | -1.95746000 | -3.04562500 |
| H | 6.92206900  | -1.52621900 | -1.96441200 |
| C | 5.67027400  | -1.93672200 | 0.44471400  |
| H | 5.93662900  | -2.99251400 | 0.56615900  |
| H | 6.58205600  | -1.33547900 | 0.53183700  |
| H | 4.99934900  | -1.65658500 | 1.26337100  |
| C | 3.71738900  | -2.54317200 | -1.00126600 |
| C | 3.65757200  | -3.85004000 | -1.49869600 |
| C | 2.54228500  | -2.01875400 | -0.45035600 |
| C | 2.48178300  | -4.59664600 | -1.42512600 |
| H | 4.53939300  | -4.30058900 | -1.94025100 |
| C | 1.34045600  | -2.74022000 | -0.35453900 |
| C | 1.33420600  | -4.05079300 | -0.85304000 |
| H | 2.46183800  | -5.61149700 | -1.81073100 |
| H | 0.42720200  | -4.64180400 | -0.80376400 |
| O | 2.52509900  | -0.73166300 | 0.05174400  |
| P | 1.32240100  | 1.90039900  | 0.27963600  |
| P | -0.17729900 | -1.91138700 | 0.30592600  |
| C | 1.66119200  | 1.88667800  | 2.09624400  |
| C | 2.90794300  | 2.27598800  | 2.61324200  |
| C | 0.63449800  | 1.54696000  | 2.98791500  |
| C | 3.11686600  | 2.32606600  | 3.99127400  |
| H | 3.71646400  | 2.54312300  | 1.93997500  |
| C | 0.84140500  | 1.60747400  | 4.36769900  |
| H | -0.32900100 | 1.22133600  | 2.60956600  |
| C | 2.08288500  | 1.99680500  | 4.87128100  |
| H | 4.08670200  | 2.62698800  | 4.37760800  |
| H | 0.03677400  | 1.33661900  | 5.04441500  |
| H | 2.24680700  | 2.04017300  | 5.94432000  |
| C | 1.05885700  | 3.70176200  | -0.05416900 |
| C | 1.11803400  | 4.19582800  | -1.37122100 |
| C | 0.69294900  | 4.58672900  | 0.97357600  |
| C | 0.84114400  | 5.53495700  | -1.64641200 |
| H | 1.40164400  | 3.53706000  | -2.18668200 |
| C | 0.39993700  | 5.92431600  | 0.69266000  |
| H | 0.64994900  | 4.24029200  | 2.00073300  |
| C | 0.47612700  | 6.40401100  | -0.61459500 |
| H | 0.91171600  | 5.89923500  | -2.66769300 |
| H | 0.12441200  | 6.59244800  | 1.50389800  |
| H | 0.25856900  | 7.44623700  | -0.82936900 |
| C | 0.00659000  | -1.97713700 | 2.14521400  |
| C | 1.21119200  | -2.28981700 | 2.78839300  |
| C | -1.12210000 | -1.68475500 | 2.93279700  |
| C | 1.28531500  | -2.31132000 | 4.18360000  |
| H | 2.09300500  | -2.53409900 | 2.20581500  |
| C | -1.04918300 | -1.71480300 | 4.32490200  |
| H | -2.07803700 | -1.47323700 | 2.45793300  |
| C | 0.15864300  | -2.02685800 | 4.95509700  |
| H | 2.22603500  | -2.56226500 | 4.66557700  |
| H | -1.93672900 | -1.50666000 | 4.91653600  |
| H | 0.21687200  | -2.05668100 | 6.03938300  |
| C | -1.49096800 | -3.19078100 | 0.04202800  |

|    |             |             |             |
|----|-------------|-------------|-------------|
| C  | -1.65567100 | -4.28425500 | 0.91065100  |
| C  | -2.33722600 | -3.08444500 | -1.07208800 |
| C  | -2.64279400 | -5.24018800 | 0.66869800  |
| H  | -1.01289300 | -4.38998100 | 1.77864700  |
| C  | -3.32302800 | -4.04351700 | -1.31558600 |
| H  | -2.21519000 | -2.25053000 | -1.75428900 |
| C  | -3.47950900 | -5.12187000 | -0.44378000 |
| H  | -2.75756000 | -6.07844300 | 1.35015700  |
| H  | -3.96861800 | -3.94768100 | -2.18451400 |
| H  | -4.24855900 | -5.86634400 | -0.62897600 |
| Pd | -0.32483500 | 0.37098100  | -0.81717500 |
| C  | -2.06369800 | 1.24241500  | 0.20890400  |
| H  | -2.02872100 | 0.54357900  | 1.04107600  |
| H  | -1.66509500 | 2.23499500  | 0.40139000  |
| C  | -0.04550900 | -0.99820000 | -3.53370300 |
| H  | 1.00830800  | -0.71767000 | -3.50535200 |
| C  | -0.38734000 | -2.17287700 | -4.08534300 |
| H  | -1.42363400 | -2.49328400 | -4.16410800 |
| H  | 0.36104400  | -2.84759100 | -4.48790200 |
| C  | -0.98865900 | -0.00492000 | -3.00848000 |
| H  | -2.04124200 | -0.27924400 | -3.05520700 |
| C  | -0.64178200 | 1.33736400  | -2.85442700 |
| H  | 0.38735100  | 1.59388800  | -3.11093700 |
| C  | -1.58437500 | 2.51964400  | -3.01657600 |
| H  | -1.44463800 | 2.86492800  | -4.05290400 |
| H  | -1.24284200 | 3.35562500  | -2.39303700 |
| C  | -3.09234200 | 2.31475200  | -2.80195900 |
| C  | -3.57399000 | 2.38454000  | -1.34553400 |
| H  | -3.17678700 | 3.28829300  | -0.87040700 |
| H  | -4.66553200 | 2.45651300  | -1.32167100 |
| N  | -3.20937800 | 1.24085000  | -0.49855400 |
| C  | -4.08572400 | 0.05842000  | -0.54718400 |
| H  | -4.13990800 | -0.30080300 | -1.58214100 |
| H  | -3.59844400 | -0.73023200 | 0.03248400  |
| C  | -5.48514500 | 0.33719800  | -0.02958300 |
| C  | -5.68678800 | 0.74705600  | 1.29620500  |
| C  | -6.59546800 | 0.16913900  | -0.86447800 |
| C  | -6.97420200 | 0.98175800  | 1.77588900  |
| H  | -4.83360400 | 0.88340600  | 1.95749300  |
| C  | -7.88717600 | 0.40046600  | -0.38495300 |
| H  | -6.45213500 | -0.15032000 | -1.89448100 |
| C  | -8.07795700 | 0.80793500  | 0.93536800  |
| H  | -7.11865500 | 1.29674000  | 2.80542800  |
| H  | -8.74012700 | 0.26370700  | -1.04335600 |
| H  | -9.08101100 | 0.98922400  | 1.31037300  |
| H  | -3.43951000 | 1.38876900  | -3.27669100 |
| H  | -3.61531400 | 3.12543400  | -3.32426000 |

### TS10

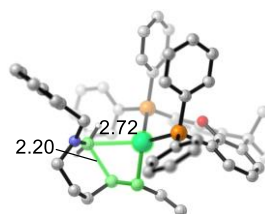

|   |             |             |             |
|---|-------------|-------------|-------------|
| C | -3.22437100 | -1.17944500 | -0.09540100 |
| C | -4.57930200 | -1.22911600 | -0.44113100 |
| C | -5.06058800 | -2.43842300 | -0.95499500 |
| C | -4.22297900 | -3.54658400 | -1.09102200 |
| C | -2.87702200 | -3.46316000 | -0.73644300 |
| C | -2.34355700 | -2.26128800 | -0.24676600 |
| H | -6.10221800 | -2.52810300 | -1.24308000 |



|   |             |             |             |
|---|-------------|-------------|-------------|
| H | -4.62232400 | -4.48052500 | -1.47490800 |
| H | -2.23643700 | -4.32984200 | -0.85487100 |
| C | -5.44526200 | 0.00913600  | -0.16857700 |
| C | -6.70326500 | 0.03579300  | -1.05407600 |
| H | -7.31881600 | 0.91080300  | -0.82646000 |
| H | -6.45281000 | 0.05558800  | -2.11995600 |
| H | -7.33042300 | -0.83933100 | -0.86198000 |
| C | -5.88752800 | -0.02263700 | 1.32344800  |
| H | -6.47887600 | 0.86802600  | 1.56315200  |
| H | -6.50079700 | -0.90952800 | 1.51778200  |
| H | -5.02450200 | -0.05268900 | 1.99612000  |
| C | -4.56564300 | 1.24832200  | -0.38638100 |
| C | -5.02458100 | 2.47997100  | -0.86696200 |
| C | -3.21652400 | 1.17164500  | -0.02671100 |
| C | -4.16683500 | 3.57609400  | -0.96674500 |
| H | -6.06100100 | 2.59342100  | -1.16524300 |
| C | -2.32534900 | 2.25248300  | -0.10205900 |
| C | -2.82890100 | 3.46742500  | -0.58764200 |
| H | -4.54388500 | 4.52262200  | -1.34234000 |
| H | -2.17509200 | 4.32609400  | -0.68476700 |
| O | -2.69282200 | -0.02092400 | 0.43335600  |
| P | -0.55943600 | -2.01387600 | 0.17235500  |
| P | -0.54773600 | 1.93731400  | 0.27363100  |
| C | -0.48830400 | -2.30093800 | 1.99009100  |
| C | -1.41745700 | -3.11708100 | 2.65548000  |
| C | 0.56560200  | -1.73307500 | 2.71983000  |
| C | -1.28620600 | -3.36281900 | 4.02235900  |
| H | -2.24225500 | -3.56200200 | 2.10718100  |
| C | 0.70114200  | -1.98809400 | 4.08558600  |
| H | 1.27365000  | -1.07636500 | 2.22230100  |
| C | -0.22460700 | -2.80364600 | 4.73814200  |
| H | -2.01166400 | -3.99426200 | 4.52767800  |
| H | 1.52046400  | -1.53917000 | 4.63912900  |
| H | -0.12339900 | -2.99916000 | 5.80198000  |
| C | 0.23566000  | -3.53711600 | -0.52143200 |
| C | 0.19819000  | -3.74548200 | -1.91345300 |
| C | 0.95449200  | -4.44301900 | 0.27252000  |
| C | 0.84335400  | -4.83868000 | -2.49068200 |
| H | -0.35750400 | -3.05788300 | -2.54669600 |
| C | 1.61220000  | -5.53126000 | -0.30980800 |
| H | 0.99677900  | -4.30942800 | 1.34833500  |
| C | 1.55654100  | -5.73482100 | -1.68833000 |
| H | 0.78666900  | -4.99371800 | -3.56478300 |
| H | 2.15974900  | -6.22521900 | 0.32186500  |
| H | 2.06144600  | -6.58568800 | -2.13652900 |
| C | -0.44913800 | 1.78263600  | 2.11684500  |
| C | -1.56848000 | 1.62392600  | 2.94411200  |
| C | 0.82379000  | 1.86827000  | 2.70838900  |
| C | -1.41728800 | 1.55104100  | 4.33125800  |
| H | -2.56372300 | 1.57351200  | 2.51773800  |
| C | 0.97131200  | 1.80100700  | 4.09251400  |
| H | 1.70388800  | 2.01944400  | 2.08817800  |
| C | -0.15122100 | 1.63971500  | 4.90922600  |
| H | -2.29613500 | 1.43466300  | 4.95926200  |
| H | 1.96101500  | 1.88483200  | 4.53341500  |
| H | -0.03908100 | 1.59277900  | 5.98866600  |
| C | 0.27379600  | 3.58500500  | 0.07577300  |
| C | -0.13586700 | 4.69250500  | 0.84173900  |
| C | 1.37264100  | 3.73231900  | -0.78037100 |
| C | 0.51722100  | 5.91804800  | 0.72219200  |
| H | -0.96045000 | 4.59358000  | 1.54169900  |
| C | 2.03266500  | 4.95927600  | -0.89563700 |
| H | 1.72120600  | 2.87584200  | -1.34610000 |
| C | 1.60120600  | 6.05562000  | -0.15033300 |

|    |             |             |             |
|----|-------------|-------------|-------------|
| H  | 0.18553300  | 6.76467600  | 1.31655200  |
| H  | 2.88343600  | 5.05555100  | -1.56484800 |
| H  | 2.11061600  | 7.01086900  | -0.23909600 |
| Pd | 0.29180600  | 0.08079600  | -0.98835300 |
| C  | 2.56213500  | -1.18322800 | -1.79003700 |
| H  | 2.04435700  | -1.61019900 | -0.94245100 |
| H  | 2.69563300  | -1.88745200 | -2.60523100 |
| C  | -0.97542300 | 0.94911800  | -3.33973300 |
| H  | -1.44889800 | -0.02794100 | -3.44124600 |
| C  | -1.67744900 | 2.05049000  | -3.65710000 |
| H  | -1.24226200 | 3.04490400  | -3.59197900 |
| H  | -2.70660400 | 1.98928500  | -3.99599600 |
| C  | 0.43266000  | 0.95719800  | -2.91438700 |
| H  | 0.89818100  | 1.94063600  | -2.95881900 |
| C  | 1.27469800  | -0.16815900 | -3.26187600 |
| H  | 0.71887200  | -1.03783600 | -3.61463900 |
| C  | 2.47812900  | 0.12900400  | -4.17859500 |
| H  | 2.08941600  | 0.66661500  | -5.05329300 |
| H  | 2.87298100  | -0.82072800 | -4.56577500 |
| C  | 3.64151600  | 0.92780600  | -3.56834000 |
| C  | 4.46209900  | 0.08772200  | -2.58792300 |
| H  | 4.90163900  | -0.77023000 | -3.11358400 |
| H  | 5.28665400  | 0.65844700  | -2.15438800 |
| N  | 3.63526200  | -0.41792300 | -1.48553500 |
| C  | 3.73669800  | 0.27561700  | -0.19488800 |
| H  | 3.53812600  | 1.34758400  | -0.33247900 |
| H  | 2.93152500  | -0.11233500 | 0.43853800  |
| C  | 5.08860900  | 0.08710600  | 0.46756600  |
| C  | 5.59712500  | -1.19875200 | 0.70105900  |
| C  | 5.83451100  | 1.19748800  | 0.87868400  |
| C  | 6.82606600  | -1.36753900 | 1.33667600  |
| H  | 5.03115900  | -2.06917900 | 0.37727700  |
| C  | 7.06501700  | 1.03021500  | 1.51926300  |
| H  | 5.45123800  | 2.20004500  | 0.69975500  |
| C  | 7.56273200  | -0.25256000 | 1.74838200  |
| H  | 7.21071100  | -2.36830100 | 1.51214000  |
| H  | 7.63382500  | 1.90102900  | 1.83253800  |
| H  | 8.52053900  | -0.38552900 | 2.24308200  |
| H  | 3.27129700  | 1.83494100  | -3.07303100 |
| H  | 4.30684900  | 1.26104300  | -4.37322000 |

### CP13

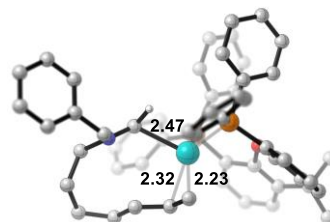

|   |             |             |             |
|---|-------------|-------------|-------------|
| C | -3.20026800 | -1.11894400 | -0.64205100 |
| C | -4.36073600 | -1.25546100 | -1.40945800 |
| C | -4.69473500 | -2.54757700 | -1.83338000 |
| C | -3.91079300 | -3.64711700 | -1.48046100 |
| C | -2.76600300 | -3.47876700 | -0.70123900 |
| C | -2.38274500 | -2.19999400 | -0.27455200 |
| H | -5.58083000 | -2.70612600 | -2.43803500 |
| H | -4.19699000 | -4.64103200 | -1.81111600 |
| H | -2.16427800 | -4.34008900 | -0.43175500 |
| C | -5.21075100 | -0.00349400 | -1.66500200 |
| C | -6.11351100 | -0.16457400 | -2.90050300 |
| H | -6.73503300 | 0.72376000  | -3.04491400 |
| H | -5.53124300 | -0.33210900 | -3.81273400 |
| H | -6.80273300 | -1.00391500 | -2.77074400 |

|    |             |             |             |
|----|-------------|-------------|-------------|
| C  | -6.11067000 | 0.23711300  | -0.41793000 |
| H  | -6.70861900 | 1.14552600  | -0.55103900 |
| H  | -6.79160300 | -0.60885900 | -0.27229500 |
| H  | -5.51136400 | 0.35191000  | 0.49082800  |
| C  | -4.25334500 | 1.18825700  | -1.80666000 |
| C  | -4.48353500 | 2.29762400  | -2.62787600 |
| C  | -3.09601900 | 1.20720600  | -1.01915000 |
| C  | -3.59948900 | 3.37705200  | -2.64127500 |
| H  | -5.36231900 | 2.32901600  | -3.26245200 |
| C  | -2.18154200 | 2.27430100  | -1.00503500 |
| C  | -2.46138200 | 3.36928800  | -1.83602900 |
| H  | -3.79974700 | 4.23017000  | -3.28252500 |
| H  | -1.78037200 | 4.21212600  | -1.86432900 |
| O  | -2.80673600 | 0.13057600  | -0.19989200 |
| P  | -0.83380300 | -1.84303500 | 0.66304100  |
| P  | -0.61700900 | 2.10611800  | -0.02681000 |
| C  | -1.44089000 | -1.46730800 | 2.36378100  |
| C  | -2.68803300 | -1.91350900 | 2.82950300  |
| C  | -0.59851800 | -0.77084500 | 3.24183700  |
| C  | -3.07642300 | -1.67326700 | 4.14856900  |
| H  | -3.35411300 | -2.45429400 | 2.16411000  |
| C  | -0.98365000 | -0.53876600 | 4.56238800  |
| H  | 0.35930500  | -0.39690900 | 2.89036600  |
| C  | -2.22357100 | -0.99006900 | 5.01801500  |
| H  | -4.04421500 | -2.02345800 | 4.49683200  |
| H  | -0.32222200 | 0.00551600  | 5.22962300  |
| H  | -2.52623100 | -0.80635200 | 6.04505300  |
| C  | -0.05494400 | -3.50842100 | 0.88099000  |
| C  | 0.76423700  | -3.99509100 | -0.15243600 |
| C  | -0.23131000 | -4.29766000 | 2.02923100  |
| C  | 1.37197000  | -5.24796100 | -0.05127500 |
| H  | 0.92281100  | -3.38927700 | -1.03954900 |
| C  | 0.38784200  | -5.54536000 | 2.13311000  |
| H  | -0.85360600 | -3.94366600 | 2.84412400  |
| C  | 1.18697500  | -6.02563700 | 1.09422300  |
| H  | 1.98919200  | -5.61678000 | -0.86649500 |
| H  | 0.24054100  | -6.14351900 | 3.02798600  |
| H  | 1.66323900  | -6.99846900 | 1.17696400  |
| C  | -1.10676800 | 2.51410100  | 1.71156700  |
| C  | -2.43627900 | 2.56941900  | 2.14913200  |
| C  | -0.08034600 | 2.78012300  | 2.63530300  |
| C  | -2.73236100 | 2.88911600  | 3.47702500  |
| H  | -3.24793800 | 2.37936100  | 1.45507800  |
| C  | -0.37731600 | 3.10936500  | 3.95636000  |
| H  | 0.95914400  | 2.76183500  | 2.31455000  |
| C  | -1.70758000 | 3.16348900  | 4.38219800  |
| H  | -3.76935100 | 2.93389000  | 3.79810100  |
| H  | 0.42810400  | 3.33174600  | 4.65139300  |
| H  | -1.94162900 | 3.42380400  | 5.41058500  |
| C  | 0.34392200  | 3.62919100  | -0.45921100 |
| C  | -0.03627200 | 4.90671800  | -0.00974100 |
| C  | 1.50636100  | 3.51046400  | -1.23439200 |
| C  | 0.72078500  | 6.03006100  | -0.34218700 |
| H  | -0.92212000 | 5.02251800  | 0.60752200  |
| C  | 2.26641300  | 4.63494000  | -1.56634100 |
| H  | 1.81327500  | 2.52846800  | -1.57970200 |
| C  | 1.87339200  | 5.89730100  | -1.12163300 |
| H  | 0.41253700  | 7.01009900  | 0.01111400  |
| H  | 3.16338500  | 4.52435000  | -2.16978300 |
| H  | 2.46258300  | 6.77369200  | -1.37615400 |
| Pd | 0.26592200  | -0.18232000 | -0.76499600 |
| C  | 2.44525400  | -0.67210100 | 0.29906900  |
| H  | 2.14713600  | 0.24675700  | 0.79298400  |
| H  | 2.10696000  | -1.62229800 | 0.69019600  |

|   |             |             |             |
|---|-------------|-------------|-------------|
| C | 0.74478800  | -0.99961100 | -2.88772600 |
| H | -0.05715900 | -1.71232600 | -3.07007800 |
| C | 0.48165700  | 0.37037700  | -2.90955600 |
| H | 1.29645500  | 1.07098700  | -3.07694300 |
| H | -0.50545800 | 0.74456300  | -3.16874800 |
| C | 2.11493000  | -1.48635100 | -2.92197700 |
| H | 2.85742700  | -0.70473300 | -2.77604400 |
| C | 2.54085700  | -2.75265900 | -3.05126300 |
| H | 1.81940800  | -3.54636800 | -3.24552300 |
| C | 3.97793500  | -3.17096200 | -2.87414600 |
| H | 4.46322000  | -3.33880800 | -3.84754900 |
| H | 3.99682600  | -4.15168500 | -2.37689600 |
| C | 4.84570600  | -2.19629800 | -2.05408000 |
| C | 4.34865900  | -1.93554700 | -0.60927800 |
| H | 3.70809900  | -2.75441000 | -0.27391900 |
| H | 5.21334400  | -1.89282700 | 0.06128900  |
| N | 3.59973200  | -0.67565900 | -0.35407800 |
| C | 4.28098100  | 0.60388900  | -0.66125700 |
| H | 4.42517300  | 0.67186200  | -1.74418400 |
| H | 3.58718800  | 1.40120400  | -0.38045700 |
| C | 5.61217400  | 0.75356700  | 0.04991400  |
| C | 5.66652000  | 0.82612300  | 1.44942300  |
| C | 6.80113000  | 0.83956900  | -0.68322100 |
| C | 6.88908500  | 0.97695800  | 2.10178700  |
| H | 4.75003700  | 0.76801900  | 2.03303900  |
| C | 8.02645600  | 0.99630600  | -0.03118400 |
| H | 6.77127000  | 0.79233100  | -1.76941500 |
| C | 8.07205100  | 1.06237900  | 1.36155500  |
| H | 6.91982500  | 1.03416800  | 3.18599100  |
| H | 8.94167500  | 1.06601900  | -0.61171500 |
| H | 9.02394400  | 1.18319100  | 1.87025500  |
| H | 4.97999300  | -1.25340100 | -2.59447500 |
| H | 5.85083700  | -2.62539200 | -1.97524000 |

### TS11

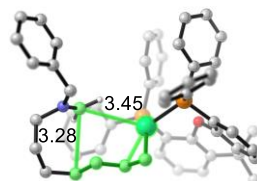

|   |             |             |             |
|---|-------------|-------------|-------------|
| C | -3.19570700 | -1.56909800 | -0.08871100 |
| C | -4.45712600 | -1.95664700 | -0.55323100 |
| C | -4.66885100 | -3.32426400 | -0.75986900 |
| C | -3.66429400 | -4.25474200 | -0.49055300 |
| C | -2.41364800 | -3.83461400 | -0.03783500 |
| C | -2.14560000 | -2.47089200 | 0.14980700  |
| H | -5.62878600 | -3.67545000 | -1.12204700 |
| H | -3.85677000 | -5.31352400 | -0.63662000 |
| H | -1.64081800 | -4.57023600 | 0.15558400  |
| C | -5.52229100 | -0.86745200 | -0.74064500 |
| C | -6.62148800 | -1.30368300 | -1.72467600 |
| H | -7.38332000 | -0.52511400 | -1.82473600 |
| H | -6.21662600 | -1.52200400 | -2.71854500 |
| H | -7.13836900 | -2.19524000 | -1.35800500 |
| C | -6.17754000 | -0.58031800 | 0.64174400  |
| H | -6.91701700 | 0.22326300  | 0.55213000  |
| H | -6.68334100 | -1.47774100 | 1.01527000  |
| H | -5.43104000 | -0.27816000 | 1.38303000  |
| C | -4.80502600 | 0.40657000  | -1.21095300 |
| C | -5.34683600 | 1.35047800  | -2.09027800 |
| C | -3.53925100 | 0.68179700  | -0.68232100 |
| C | -4.65055300 | 2.51843400  | -2.40371700 |

|    |             |             |             |
|----|-------------|-------------|-------------|
| H  | -6.32089900 | 1.18124600  | -2.53596000 |
| C  | -2.81407600 | 1.85241100  | -0.95819700 |
| C  | -3.40008700 | 2.77192200  | -1.84027800 |
| H  | -5.08723900 | 3.23848700  | -3.08941000 |
| H  | -2.87202700 | 3.68150500  | -2.10177500 |
| O  | -2.94013900 | -0.23624300 | 0.16184700  |
| P  | -0.49364200 | -1.77454500 | 0.61454100  |
| P  | -1.09889400 | 2.01348100  | -0.27287700 |
| C  | -0.67692300 | -1.45801900 | 2.42597400  |
| C  | -1.48924200 | -2.26061000 | 3.24405600  |
| C  | 0.05766500  | -0.41882600 | 3.01213500  |
| C  | -1.55374200 | -2.03122100 | 4.61841700  |
| H  | -2.07245600 | -3.06587700 | 2.80715400  |
| C  | -0.00222400 | -0.19271300 | 4.38912300  |
| H  | 0.65711900  | 0.23381600  | 2.38359600  |
| C  | -0.80658700 | -1.00000700 | 5.19405100  |
| H  | -2.18755900 | -2.65768800 | 5.24005100  |
| H  | 0.56112700  | 0.62628300  | 4.82609900  |
| H  | -0.85961300 | -0.82204500 | 6.26454200  |
| C  | 0.61339100  | -3.26750800 | 0.61209600  |
| C  | 0.84430000  | -3.94350200 | -0.60095200 |
| C  | 1.33921300  | -3.67024000 | 1.74538500  |
| C  | 1.75529400  | -4.99809100 | -0.67371400 |
| H  | 0.30316000  | -3.64176700 | -1.49260900 |
| C  | 2.26752300  | -4.71441800 | 1.66709200  |
| H  | 1.17631200  | -3.17721600 | 2.69785000  |
| C  | 2.47717800  | -5.38402500 | 0.46102900  |
| H  | 1.90009000  | -5.52081200 | -1.61557500 |
| H  | 2.81372700  | -5.01229200 | 2.55816200  |
| H  | 3.18694500  | -6.20466000 | 0.40543900  |
| C  | -1.35955300 | 2.49191200  | 1.50236300  |
| C  | -2.57393900 | 2.33532400  | 2.18239700  |
| C  | -0.26620700 | 3.04059400  | 2.19605300  |
| C  | -2.69231500 | 2.71823600  | 3.52143600  |
| H  | -3.43898800 | 1.92910300  | 1.67030400  |
| C  | -0.38762900 | 3.43099900  | 3.52837100  |
| H  | 0.68054400  | 3.19123500  | 1.68189400  |
| C  | -1.60408200 | 3.26848200  | 4.19768500  |
| H  | -3.64415800 | 2.59483100  | 4.03081800  |
| H  | 0.46335700  | 3.87205700  | 4.04120800  |
| H  | -1.70315700 | 3.57598900  | 5.23494400  |
| C  | -0.50241000 | 3.64380800  | -0.92284800 |
| C  | -1.14074000 | 4.85313000  | -0.59100200 |
| C  | 0.64999400  | 3.69191900  | -1.71855600 |
| C  | -0.65276000 | 6.06857500  | -1.06848800 |
| H  | -2.01705300 | 4.84455300  | 0.05062800  |
| C  | 1.14386900  | 4.91053100  | -2.19294100 |
| H  | 1.16109800  | 2.76602100  | -1.96040600 |
| C  | 0.49002400  | 6.09993300  | -1.87348600 |
| H  | -1.16034900 | 6.99298500  | -0.80723900 |
| H  | 2.03740600  | 4.92919600  | -2.81146000 |
| H  | 0.87002400  | 7.04851600  | -2.24237300 |
| Pd | -0.00953100 | -0.03600300 | -1.00328700 |
| C  | 3.14635800  | -1.19659100 | -0.22627200 |
| H  | 2.34620800  | -0.57291900 | 0.17079900  |
| H  | 3.01037100  | -2.27088300 | -0.27575800 |
| C  | 0.66932500  | -0.91415900 | -2.98834900 |
| H  | 0.02385200  | -1.77126100 | -3.17179200 |
| C  | 0.14488900  | 0.38290800  | -3.12886200 |
| H  | 0.81517900  | 1.20563000  | -3.36785600 |
| H  | -0.87936500 | 0.52410100  | -3.46701800 |
| C  | 2.11062000  | -1.15464000 | -3.07754700 |
| H  | 2.72203100  | -0.25281200 | -3.00414900 |
| C  | 2.71443600  | -2.34195400 | -3.27048100 |

|   |            |             |             |
|---|------------|-------------|-------------|
| H | 2.08671400 | -3.22460700 | -3.38943000 |
| C | 4.19697000 | -2.60531600 | -3.40475900 |
| H | 4.43806800 | -2.76123500 | -4.46762500 |
| H | 4.43171500 | -3.56753800 | -2.92472600 |
| C | 5.17750700 | -1.54995500 | -2.85819200 |
| C | 5.29203800 | -1.47565900 | -1.32232200 |
| H | 5.25123100 | -2.47612100 | -0.88344900 |
| H | 6.23668400 | -1.01467600 | -1.02496400 |
| N | 4.22660500 | -0.66439500 | -0.67167100 |
| C | 4.44144100 | 0.81288700  | -0.61221400 |
| H | 4.66365400 | 1.13957500  | -1.63223200 |
| H | 3.48500200 | 1.25298900  | -0.31766100 |
| C | 5.56408700 | 1.18741200  | 0.32987300  |
| C | 5.40760400 | 1.03218600  | 1.71465900  |
| C | 6.76525700 | 1.70346800  | -0.17222000 |
| C | 6.44033500 | 1.38349600  | 2.58204600  |
| H | 4.47584800 | 0.64148200  | 2.11890800  |
| C | 7.79862000 | 2.05856100  | 0.69745900  |
| H | 6.89048800 | 1.84116700  | -1.24389600 |
| C | 7.63777100 | 1.89608900  | 2.07391700  |
| H | 6.31047600 | 1.26343700  | 3.65348200  |
| H | 8.72413700 | 2.46320200  | 0.29905500  |
| H | 8.44030200 | 2.17239800  | 2.75130000  |
| H | 4.96522400 | -0.55778300 | -3.27465900 |
| H | 6.18231600 | -1.80797900 | -3.21326700 |

### CP14

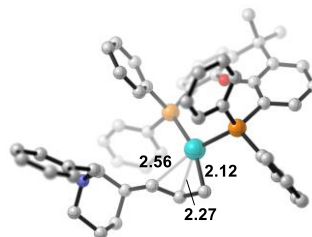

|   |             |             |             |
|---|-------------|-------------|-------------|
| C | -3.14217000 | -1.95219100 | 0.51889800  |
| C | -4.41790800 | -2.49933900 | 0.69569500  |
| C | -4.57980700 | -3.85045400 | 0.37483800  |
| C | -3.50465300 | -4.61226200 | -0.08723300 |
| C | -2.24612700 | -4.03534600 | -0.24877600 |
| C | -2.04452200 | -2.67747900 | 0.04636200  |
| H | -5.54990700 | -4.32175800 | 0.48801700  |
| H | -3.65030600 | -5.66152700 | -0.32531800 |
| H | -1.42393100 | -4.63747700 | -0.61831400 |
| C | -5.51271700 | -1.59209700 | 1.27246100  |
| C | -6.92357400 | -2.11981900 | 0.96221800  |
| H | -7.68518000 | -1.47158500 | 1.40554300  |
| H | -7.10859000 | -2.18540000 | -0.11514900 |
| H | -7.07078900 | -3.11152800 | 1.39990100  |
| C | -5.33314300 | -1.52193500 | 2.81705500  |
| H | -6.07951400 | -0.84929300 | 3.25392800  |
| H | -5.46247100 | -2.51628100 | 3.25818300  |
| H | -4.33895600 | -1.15445000 | 3.08919200  |
| C | -5.28409200 | -0.19099900 | 0.69061000  |
| C | -6.29454900 | 0.72353700  | 0.37935300  |
| C | -3.96303400 | 0.22873800  | 0.49626100  |
| C | -5.98674700 | 2.00355500  | -0.08628400 |
| H | -7.33488800 | 0.44549700  | 0.50777000  |
| C | -3.61656600 | 1.48694400  | -0.00879800 |
| C | -4.66136100 | 2.38670500  | -0.27907300 |
| H | -6.78607100 | 2.70476900  | -0.30546300 |
| H | -4.44017500 | 3.37965200  | -0.65131900 |
| O | -2.92217800 | -0.61914700 | 0.80640300  |

|    |             |             |             |
|----|-------------|-------------|-------------|
| P  | -0.41127500 | -1.83033200 | -0.13420100 |
| P  | -1.84222500 | 1.90591600  | -0.28956400 |
| C  | 0.32705400  | -1.97086200 | 1.54514000  |
| C  | 0.11289200  | -3.09379100 | 2.36257200  |
| C  | 1.12380200  | -0.92153900 | 2.02710000  |
| C  | 0.70348200  | -3.16966100 | 3.62401200  |
| H  | -0.52040600 | -3.90643600 | 2.01933100  |
| C  | 1.71245500  | -0.99843300 | 3.29104400  |
| H  | 1.26471600  | -0.03228500 | 1.41983500  |
| C  | 1.50633400  | -2.12461600 | 4.08879800  |
| H  | 0.53189400  | -4.04326500 | 4.24641800  |
| H  | 2.32156900  | -0.17551700 | 3.65384700  |
| H  | 1.96130900  | -2.18512800 | 5.07326200  |
| C  | 0.47656900  | -3.05557300 | -1.19251400 |
| C  | 0.12937800  | -3.09830100 | -2.55543900 |
| C  | 1.45392000  | -3.93799900 | -0.71374900 |
| C  | 0.73900000  | -4.01056700 | -3.41596200 |
| H  | -0.62970800 | -2.42152900 | -2.94237400 |
| C  | 2.07050700  | -4.84625800 | -1.58103600 |
| H  | 1.73628200  | -3.92536900 | 0.33401400  |
| C  | 1.71459300  | -4.88666600 | -2.92943200 |
| H  | 0.45383700  | -4.03843400 | -4.46395300 |
| H  | 2.82548400  | -5.52591400 | -1.19589800 |
| H  | 2.19154900  | -5.59688300 | -3.59861800 |
| C  | -1.21941500 | 2.43769600  | 1.36265300  |
| C  | -2.07214100 | 2.59965500  | 2.46397000  |
| C  | 0.15123400  | 2.70828700  | 1.51808200  |
| C  | -1.56225900 | 3.02216700  | 3.69382300  |
| H  | -3.13427800 | 2.40127400  | 2.36616700  |
| C  | 0.65566900  | 3.14202800  | 2.74371500  |
| H  | 0.82598700  | 2.58579300  | 0.67475100  |
| C  | -0.20143500 | 3.29557800  | 3.83660500  |
| H  | -2.23370500 | 3.14101700  | 4.53932400  |
| H  | 1.71567400  | 3.35745800  | 2.84604100  |
| H  | 0.19049500  | 3.62752600  | 4.79362000  |
| C  | -1.99211500 | 3.47065000  | -1.26033400 |
| C  | -1.63047800 | 4.72039600  | -0.74050700 |
| C  | -2.48874000 | 3.39637900  | -2.57460400 |
| C  | -1.75723000 | 5.87316700  | -1.52280000 |
| H  | -1.25624900 | 4.80368500  | 0.27428600  |
| C  | -2.62428200 | 4.54831900  | -3.34704500 |
| H  | -2.78170800 | 2.43514100  | -2.99149600 |
| C  | -2.25359800 | 5.79106400  | -2.82293800 |
| H  | -1.47231900 | 6.83545200  | -1.10711700 |
| H  | -3.01630700 | 4.47690000  | -4.35764800 |
| H  | -2.35406000 | 6.68821800  | -3.42675200 |
| Pd | -0.19047700 | 0.38886600  | -1.18246700 |
| C  | 3.94007500  | -1.40389800 | -0.98033200 |
| H  | 3.27451000  | -1.53461200 | -0.12073400 |
| H  | 4.34302700  | -2.39793600 | -1.22140900 |
| C  | 1.31262100  | 0.75899600  | -2.84568400 |
| H  | 1.08858500  | 0.20688200  | -3.75783700 |
| C  | 0.52324100  | 1.89921100  | -2.49490300 |
| H  | 0.97135500  | 2.67631000  | -1.87648300 |
| H  | -0.20049100 | 2.27405800  | -3.21129500 |
| C  | 2.24783800  | 0.24942700  | -1.95788000 |
| H  | 2.51337100  | 0.88559100  | -1.11459300 |
| C  | 3.13800400  | -0.93543200 | -2.22783100 |
| H  | 2.51252200  | -1.76872100 | -2.56876700 |
| C  | 4.14487600  | -0.61822400 | -3.37751800 |
| H  | 3.61505600  | -0.20061000 | -4.24179200 |
| H  | 4.57542200  | -1.57527600 | -3.70427500 |
| C  | 5.27832000  | 0.30990200  | -2.91955600 |
| C  | 5.97958000  | -0.28027700 | -1.68352100 |

|   |            |             |             |
|---|------------|-------------|-------------|
| H | 6.46571600 | -1.22520400 | -1.96861500 |
| H | 6.76761700 | 0.38487700  | -1.31843000 |
| N | 5.05850800 | -0.55896000 | -0.57969200 |
| C | 4.78693400 | 0.56912200  | 0.30700300  |
| H | 4.47351100 | 1.48899800  | -0.22389800 |
| H | 3.93916700 | 0.27586700  | 0.94199700  |
| C | 5.96897800 | 0.92437200  | 1.19760000  |
| C | 6.71012000 | -0.07927400 | 1.83582100  |
| C | 6.30560200 | 2.26253500  | 1.42933500  |
| C | 7.75895400 | 0.25154600  | 2.69323400  |
| H | 6.46453900 | -1.11910400 | 1.64022000  |
| C | 7.35352500 | 2.59762000  | 2.29055600  |
| H | 5.74685800 | 3.05133000  | 0.92848700  |
| C | 8.08231500 | 1.59161200  | 2.92579600  |
| H | 8.32747600 | -0.53655100 | 3.17996500  |
| H | 7.60530900 | 3.64173500  | 2.45599100  |
| H | 8.90150200 | 1.84803700  | 3.59184300  |
| H | 4.88292900 | 1.30876500  | -2.68754500 |
| H | 6.00384500 | 0.44203900  | -3.73144100 |

### TS12

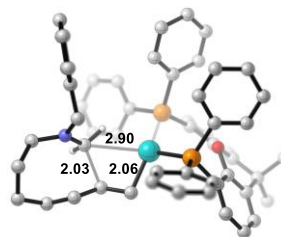

|   |             |             |             |
|---|-------------|-------------|-------------|
| C | -3.08768400 | -1.61349000 | -0.57917000 |
| C | -4.31783900 | -1.92108600 | -1.17423800 |
| C | -4.47491500 | -3.21665800 | -1.67607300 |
| C | -3.44772500 | -4.15770600 | -1.57651200 |
| C | -2.22249100 | -3.80635900 | -1.01515100 |
| C | -2.00769500 | -2.50789400 | -0.52382600 |
| H | -5.40929000 | -3.50606200 | -2.14436300 |
| H | -3.59951500 | -5.16400100 | -1.95482800 |
| H | -1.41957100 | -4.53476100 | -0.98091300 |
| C | -5.41247500 | -0.84295100 | -1.18728600 |
| C | -6.42890300 | -1.07165400 | -2.31963600 |
| H | -7.20884000 | -0.30495000 | -2.29908000 |
| H | -5.95278400 | -1.05633100 | -3.30566800 |
| H | -6.93864100 | -2.03139600 | -2.19645900 |
| C | -6.16314700 | -0.88666400 | 0.17561900  |
| H | -6.93210600 | -0.10695000 | 0.21107800  |
| H | -6.64950000 | -1.85939700 | 0.30784800  |
| H | -5.47806900 | -0.73137800 | 1.01507100  |
| C | -4.71927200 | 0.52188200  | -1.30896100 |
| C | -5.23597700 | 1.63646300  | -1.98087300 |
| C | -3.50441400 | 0.69768300  | -0.64254300 |
| C | -4.56850900 | 2.86304700  | -1.96255300 |
| H | -6.16986600 | 1.55506000  | -2.52597200 |
| C | -2.82599100 | 1.92405500  | -0.56517800 |
| C | -3.37591000 | 3.01451700  | -1.25366100 |
| H | -4.98595800 | 3.71031000  | -2.49787300 |
| H | -2.87287200 | 3.97498100  | -1.24441100 |
| O | -2.89683800 | -0.36962000 | -0.01557900 |
| P | -0.33935600 | -1.92933900 | 0.03009500  |
| P | -1.22090600 | 1.91991500  | 0.32797600  |
| C | -0.19173200 | -2.40841800 | 1.79959600  |
| C | -1.22379400 | -3.04738400 | 2.49981100  |
| C | 1.00568400  | -2.10622700 | 2.47213400  |
| C | -1.05979800 | -3.38001800 | 3.84677500  |

|    |             |             |             |
|----|-------------|-------------|-------------|
| H  | -2.15463900 | -3.28966900 | 1.99701400  |
| C  | 1.17339600  | -2.45730500 | 3.81094700  |
| H  | 1.82091600  | -1.61137900 | 1.94936100  |
| C  | 0.13750600  | -3.09149900 | 4.50283300  |
| H  | -1.86820800 | -3.87298000 | 4.37934100  |
| H  | 2.11185800  | -2.23231200 | 4.31019200  |
| H  | 0.26463200  | -3.36022100 | 5.54770900  |
| C  | 0.76752700  | -3.11778500 | -0.86188100 |
| C  | 0.85162300  | -3.00159300 | -2.26205000 |
| C  | 1.53905300  | -4.09594900 | -0.21927700 |
| C  | 1.67881900  | -3.84762300 | -2.99978800 |
| H  | 0.25019700  | -2.25757200 | -2.78113100 |
| C  | 2.37632000  | -4.93616800 | -0.96031100 |
| H  | 1.48481300  | -4.21212700 | 0.85787100  |
| C  | 2.44817000  | -4.81630700 | -2.34816800 |
| H  | 1.72011200  | -3.75417500 | -4.08160700 |
| H  | 2.96410600  | -5.69264700 | -0.44781700 |
| H  | 3.09453200  | -5.47531700 | -2.92062300 |
| C  | -1.62907600 | 1.48660400  | 2.07073300  |
| C  | -2.92574600 | 1.61881200  | 2.58937300  |
| C  | -0.58552900 | 1.09921000  | 2.92289800  |
| C  | -3.16891500 | 1.37106600  | 3.94089500  |
| H  | -3.74735600 | 1.91589600  | 1.94489400  |
| C  | -0.83215400 | 0.85453600  | 4.27395100  |
| H  | 0.42092800  | 0.98185500  | 2.53044400  |
| C  | -2.12385500 | 0.99047300  | 4.78523300  |
| H  | -4.17636600 | 1.47758300  | 4.33338300  |
| H  | -0.01663100 | 0.54755100  | 4.92172300  |
| H  | -2.31643800 | 0.79874800  | 5.83692200  |
| C  | -0.71122500 | 3.68303100  | 0.51373600  |
| C  | -1.62384200 | 4.65512500  | 0.96177200  |
| C  | 0.63177100  | 4.04735100  | 0.34055600  |
| C  | -1.20686400 | 5.96621900  | 1.18652500  |
| H  | -2.65969100 | 4.38931800  | 1.14824900  |
| C  | 1.04934400  | 5.35948900  | 0.57514000  |
| H  | 1.35662400  | 3.29957400  | 0.03535300  |
| C  | 0.12964500  | 6.32282800  | 0.98846300  |
| H  | -1.92470300 | 6.70747200  | 1.52571600  |
| H  | 2.09304300  | 5.62647900  | 0.43510000  |
| H  | 0.45243900  | 7.34448800  | 1.16635900  |
| Pd | 0.19583300  | 0.43265900  | -0.76114900 |
| C  | 2.85665800  | -0.18474500 | -1.72315600 |
| H  | 2.26599900  | -0.66109500 | -0.94444300 |
| H  | 3.04247700  | -0.86228900 | -2.55190000 |
| C  | 1.71404100  | 1.02683500  | -2.87906700 |
| H  | 1.41521300  | 0.29220800  | -3.62874300 |
| C  | 0.58344200  | 1.76183600  | -2.28084600 |
| H  | 0.79789900  | 2.79138400  | -1.99957700 |
| H  | -0.36627100 | 1.68886800  | -2.82263800 |
| C  | 2.88012200  | 1.84069200  | -3.26680700 |
| H  | 3.10771700  | 2.65582200  | -2.57782900 |
| C  | 3.80419700  | 1.48328700  | -4.16532600 |
| H  | 3.59594700  | 0.65793300  | -4.84703400 |
| C  | 5.23098200  | 1.96459800  | -4.05156300 |
| H  | 5.34852900  | 3.01818100  | -4.33727700 |
| H  | 5.86336600  | 1.39163600  | -4.73911900 |
| C  | 5.73836000  | 1.76760500  | -2.59505300 |
| C  | 5.29614100  | 0.43776400  | -1.92483900 |
| H  | 5.29012200  | -0.36981100 | -2.66438000 |
| H  | 6.04817600  | 0.16878700  | -1.17243000 |
| N  | 4.00060400  | 0.40129500  | -1.21623000 |
| C  | 3.95326100  | 1.02630700  | 0.10143900  |
| H  | 4.36859000  | 2.04198400  | 0.04430600  |
| H  | 2.89379300  | 1.15008500  | 0.36272500  |

|   |            |             |             |
|---|------------|-------------|-------------|
| C | 4.66651300 | 0.25963300  | 1.21023000  |
| C | 4.74140700 | -1.13920200 | 1.20737200  |
| C | 5.21422400 | 0.96323900  | 2.29050300  |
| C | 5.34553600 | -1.81911700 | 2.26800800  |
| H | 4.34203300 | -1.69859500 | 0.36535500  |
| C | 5.81248800 | 0.28569000  | 3.35386100  |
| H | 5.17616300 | 2.05079700  | 2.29857500  |
| C | 5.87950000 | -1.10932800 | 3.34551300  |
| H | 5.40555200 | -2.90396200 | 2.24754800  |
| H | 6.23648600 | 0.84728600  | 4.18161600  |
| H | 6.35431500 | -1.63818200 | 4.16702200  |
| H | 5.40983300 | 2.60732700  | -1.97026200 |
| H | 6.83550400 | 1.80240600  | -2.58512800 |

### TS13

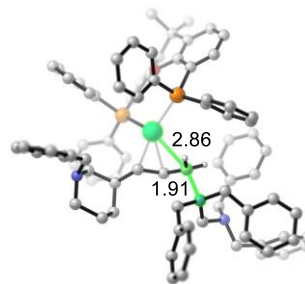

|   |             |             |             |
|---|-------------|-------------|-------------|
| C | -4.09894100 | -2.92645000 | 0.58597900  |
| C | -4.68205700 | -4.19922900 | 0.58295400  |
| C | -5.00322300 | -4.75810500 | 1.82420200  |
| C | -4.77554500 | -4.05321500 | 3.00656000  |
| C | -4.22967800 | -2.77041100 | 2.97082500  |
| C | -3.87241500 | -2.17822400 | 1.74971100  |
| H | -5.44612000 | -5.74672500 | 1.87608500  |
| H | -5.03839800 | -4.50020600 | 3.96080600  |
| H | -4.07639400 | -2.23074300 | 3.89820700  |
| C | -5.00074800 | -4.84105900 | -0.77380000 |
| C | -5.17159900 | -6.36590800 | -0.66512200 |
| H | -5.42697400 | -6.79754200 | -1.63720100 |
| H | -4.26274900 | -6.85410000 | -0.29746500 |
| H | -5.99596600 | -6.61597100 | 0.00899300  |
| C | -6.32974600 | -4.22752300 | -1.30358100 |
| H | -6.57156500 | -4.64320300 | -2.28821700 |
| H | -7.15306100 | -4.45637000 | -0.61778700 |
| H | -6.25753700 | -3.13980000 | -1.39921700 |
| C | -3.87104600 | -4.45852600 | -1.73724700 |
| C | -3.41106000 | -5.26350300 | -2.78378800 |
| C | -3.28692100 | -3.19314700 | -1.59648200 |
| C | -2.42009800 | -4.80931700 | -3.65561000 |
| H | -3.83261400 | -6.25153600 | -2.93364000 |
| C | -2.24979300 | -2.72512900 | -2.41639400 |
| C | -1.84292100 | -3.55436900 | -3.47384000 |
| H | -2.09120200 | -5.44087500 | -4.47564000 |
| H | -1.05859400 | -3.22468600 | -4.14538900 |
| O | -3.73152500 | -2.33993500 | -0.60845100 |
| P | -3.20583900 | -0.45037400 | 1.58755400  |
| P | -1.42746300 | -1.11537700 | -2.00642600 |
| C | -4.73281900 | 0.46387600  | 1.09000000  |
| C | -5.98608700 | 0.20708800  | 1.67269400  |
| C | -4.64228300 | 1.42699800  | 0.07637500  |
| C | -7.11382100 | 0.91793500  | 1.26315400  |
| H | -6.08315600 | -0.55280700 | 2.44275300  |
| C | -5.77279300 | 2.13603200  | -0.33674300 |
| H | -3.68710500 | 1.60330100  | -0.40760700 |
| C | -7.00857300 | 1.88582800  | 0.25966400  |
| H | -8.07657500 | 0.71223700  | 1.72299400  |

|    |             |             |             |   |             |             |             |
|----|-------------|-------------|-------------|---|-------------|-------------|-------------|
| H  | -5.68466500 | 2.87270700  | -1.13009400 | C | -2.14977500 | 7.49193800  | -2.23933300 |
| H  | -7.89007200 | 2.43429700  | -0.06068500 | H | -0.75780900 | 5.85068300  | -2.11770600 |
| C  | -2.95300700 | -0.02217800 | 3.37196700  | C | -3.24452300 | 8.12593100  | -1.65078700 |
| C  | -1.88494000 | -0.64742100 | 4.04277200  | H | -4.65384000 | 8.08928300  | -0.01827400 |
| C  | -3.72816700 | 0.91136400  | 4.07322700  | H | -1.69958300 | 7.90286500  | -3.13915700 |
| C  | -1.61294100 | -0.36113300 | 5.37986100  | H | -3.65466500 | 9.02998000  | -2.09242900 |
| H  | -1.26804500 | -1.37012500 | 3.51261300  | H | 1.18794500  | 4.40295600  | 1.16233100  |
| C  | -3.44462300 | 1.21017300  | 5.41022000  | H | 1.55934500  | 5.19805300  | 2.68637400  |
| H  | -4.55772800 | 1.40933500  | 3.58247300  | C | 4.10458800  | 0.65327600  | 1.20229600  |
| C  | -2.39191000 | 0.57451500  | 6.06801100  | H | 4.94419000  | 1.34670200  | 1.25819600  |
| H  | -0.79377900 | -0.86609700 | 5.88515500  | N | 3.42432400  | 0.91386200  | -0.12304000 |
| H  | -4.05660700 | 1.93738500  | 5.93690100  | C | 4.05200300  | 0.27684700  | -1.32779100 |
| H  | -2.17943600 | 0.80260100  | 7.10864900  | H | 3.65814400  | -0.74009200 | -1.36468000 |
| C  | -2.44540400 | 0.13890300  | -2.91103500 | C | 3.11047500  | 2.38414900  | -0.27161800 |
| C  | -3.47291300 | -0.20693000 | -3.79970200 | H | 2.48901800  | 2.62910800  | 0.59256200  |
| C  | -2.17129900 | 1.50121300  | -2.69609900 | H | 2.47207400  | 2.45480500  | -1.15659100 |
| C  | -4.20781200 | 0.78522600  | -4.45421600 | H | 3.36524500  | 0.96877100  | 1.95445200  |
| H  | -3.70186000 | -1.25152100 | -3.98491900 | N | 4.59714800  | -0.68514400 | 1.43087800  |
| C  | -2.89620300 | 2.49270100  | -3.35888100 | C | 5.95342100  | -0.63649000 | 2.05656800  |
| H  | -1.38676800 | 1.78519800  | -1.99850900 | H | 6.56008800  | 0.02376900  | 1.43090100  |
| C  | -3.92118200 | 2.13399200  | -4.23898000 | H | 5.89579300  | -0.18051400 | 3.05997000  |
| H  | -5.00357400 | 0.49995000  | -5.13680100 | C | 3.66891700  | -1.58642600 | 2.14459100  |
| H  | -2.66960700 | 3.54090300  | -3.18099600 | H | 2.87919300  | -1.00328600 | 2.63878600  |
| H  | -4.49210800 | 2.90238900  | -4.75264200 | H | 4.22794700  | -2.06865700 | 2.95439300  |
| C  | 0.09263800  | -1.23872600 | -3.06708900 | C | 6.65557600  | -1.97262600 | 2.17113200  |
| C  | 0.30673900  | -0.45805100 | -4.21326900 | C | 7.22778700  | -2.57781500 | 1.04228800  |
| C  | 1.08155800  | -2.16509900 | -2.68969600 | C | 6.79378100  | -2.60331200 | 3.41433800  |
| C  | 1.47825300  | -0.60188700 | -4.96453200 | C | 7.90533900  | -3.79145600 | 1.15473700  |
| H  | -0.44535200 | 0.25447500  | -4.53556000 | H | 7.15212200  | -2.08677600 | 0.07619600  |
| C  | 2.23554800  | -2.32653100 | -3.45601200 | C | 7.47101300  | -3.81965400 | 3.52996300  |
| H  | 0.94260800  | -2.77756000 | -1.80209900 | H | 6.37984400  | -2.13271100 | 4.30389700  |
| C  | 2.44136700  | -1.54115800 | -4.59508800 | C | 8.02611600  | -4.41760200 | 2.39855300  |
| H  | 1.62356500  | 0.00854500  | -5.85186500 | H | 8.34932400  | -4.24537600 | 0.27280700  |
| H  | 2.97069800  | -3.07023500 | -3.16054200 | H | 7.56988300  | -4.29313200 | 4.50273400  |
| H  | 3.34061600  | -1.66613400 | -5.19209300 | H | 8.55800700  | -5.36087600 | 2.48529100  |
| Pd | -1.15225100 | -0.15227500 | 0.29294700  | C | 3.03250500  | -2.69650900 | 1.32054200  |
| C  | -1.74910400 | 3.19487700  | 2.21443300  | C | 3.72598600  | -3.33794200 | 0.28583300  |
| H  | -2.53807800 | 2.62824900  | 1.71304800  | C | 1.76138900  | -3.17196300 | 1.67215800  |
| H  | -2.10683100 | 3.40555300  | 3.23179900  | C | 3.16424400  | -4.43547400 | -0.37112500 |
| C  | 0.86378500  | 0.56691300  | 1.02007300  | H | 4.71547000  | -2.98675500 | 0.01450000  |
| H  | 1.07087400  | 0.04606100  | 1.95384900  | C | 1.19575600  | -4.26657800 | 1.01455800  |
| C  | 1.66180700  | 0.18522600  | -0.11913700 | C | 1.89859900  | -4.90495900 | -0.00998900 |
| H  | 1.38290000  | 0.59299100  | -1.08545700 | H | 3.72507800  | -4.93684800 | -1.15604400 |
| H  | 1.96593600  | -0.85469600 | -0.16209300 | H | 1.46698600  | -5.76330700 | -0.51708600 |
| C  | -0.05847000 | 1.63072800  | 1.07047200  | H | 3.61775800  | 0.80170300  | -2.18673500 |
| H  | -0.13858000 | 2.24028600  | 0.16816900  | C | 4.23191300  | 3.39054800  | -0.39516500 |
| C  | -0.46640000 | 2.32884400  | 2.35553000  | C | 4.82316600  | 3.96157100  | 0.74267100  |
| H  | -0.66996700 | 1.55511100  | 3.10420700  | C | 4.64486500  | 3.83256100  | -1.66074300 |
| C  | 0.66520800  | 3.23160700  | 2.93052200  | C | 5.83324500  | 4.91697400  | 0.61732700  |
| H  | 1.61396200  | 2.67887200  | 2.95337700  | H | 4.48116200  | 3.67178900  | 1.73343400  |
| H  | 0.41195300  | 3.44899900  | 3.97827000  | C | 5.64869900  | 4.79237400  | -1.78901100 |
| C  | 0.81599600  | 4.56645300  | 2.18321100  | H | 4.17641300  | 3.42422900  | -2.55321600 |
| C  | -0.53723300 | 5.29754000  | 2.12431700  | C | 6.25129000  | 5.33028000  | -0.64959500 |
| H  | -0.84091800 | 5.56621400  | 3.14690900  | H | 6.28147100  | 5.34880700  | 1.50752600  |
| H  | -0.45873000 | 6.23158900  | 1.55915700  | H | 5.95642500  | 5.12336300  | -2.77659200 |
| N  | -1.59825900 | 4.48110300  | 1.53540600  | H | 7.03166400  | 6.07928200  | -0.74791400 |
| C  | -1.64551200 | 4.48869000  | 0.07777000  | C | 5.56295000  | 0.16889800  | -1.51528800 |
| H  | -0.66791400 | 4.28239500  | -0.40177000 | C | 5.99090400  | -0.92804200 | -2.28322200 |
| H  | -2.30903400 | 3.66843000  | -0.22446000 | C | 6.53116200  | 1.08556600  | -1.08463100 |
| C  | -2.18241700 | 5.79020100  | -0.50103300 | C | 7.33297100  | -1.10103200 | -2.61974100 |
| C  | -3.27836800 | 6.43729800  | 0.08524900  | H | 5.25773200  | -1.65161100 | -2.63137100 |
| C  | -1.62144300 | 6.33361500  | -1.66295700 | C | 7.88076100  | 0.90196300  | -1.40331200 |
| C  | -3.80487600 | 7.59626800  | -0.48470500 | H | 6.25254600  | 1.95639700  | -0.50665600 |
| H  | -3.70149700 | 6.02839700  | 0.99809400  | C | 8.28867300  | -0.18514600 | -2.17469200 |

|   |            |             |             |
|---|------------|-------------|-------------|
| H | 7.63138300 | -1.95450500 | -3.22238000 |
| H | 8.61150200 | 1.62442000  | -1.05063500 |
| H | 9.33676600 | -0.31798400 | -2.42642600 |
| H | 1.21061100 | -2.69020200 | 2.47778100  |
| H | 0.21172900 | -4.62252700 | 1.30706300  |

### CP15

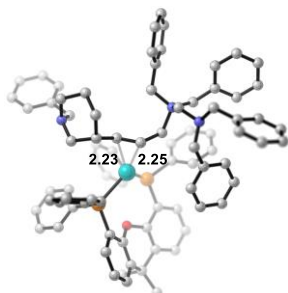

|   |             |             |             |
|---|-------------|-------------|-------------|
| C | -3.97349200 | -2.99670400 | 0.58993800  |
| C | -4.50245800 | -4.29263800 | 0.58312000  |
| C | -4.79677700 | -4.86922500 | 1.82325800  |
| C | -4.59704100 | -4.15887900 | 3.00734800  |
| C | -4.11016100 | -2.85208100 | 2.97449500  |
| C | -3.78128300 | -2.24055400 | 1.75544900  |
| H | -5.19778700 | -5.87572200 | 1.87264100  |
| H | -4.83849600 | -4.61995300 | 3.96065100  |
| H | -3.98216900 | -2.30745900 | 3.90295700  |
| C | -4.80382200 | -4.93952700 | -0.77528900 |
| C | -4.90655300 | -6.47116700 | -0.67468100 |
| H | -5.15613300 | -6.90831600 | -1.64585700 |
| H | -3.97224400 | -6.92113100 | -0.32225100 |
| H | -5.70975900 | -6.76108900 | 0.00894100  |
| C | -6.16363200 | -4.38200800 | -1.28872200 |
| H | -6.39612400 | -4.80147900 | -2.27406200 |
| H | -6.96966400 | -4.65104700 | -0.59695200 |
| H | -6.14000900 | -3.29155200 | -1.37744100 |
| C | -3.70217400 | -4.50268400 | -1.74831000 |
| C | -3.22912900 | -5.27790000 | -2.81132300 |
| C | -3.16469100 | -3.21707600 | -1.60157100 |
| C | -2.27054500 | -4.77611700 | -3.69305000 |
| H | -3.61666500 | -6.27885200 | -2.96731900 |
| C | -2.15474400 | -2.70169300 | -2.42855900 |
| C | -1.73670500 | -3.50325100 | -3.50306500 |
| H | -1.93289500 | -5.38413600 | -4.52732400 |
| H | -0.97617400 | -3.13725600 | -4.18319800 |
| O | -3.63193700 | -2.39089600 | -0.60252400 |
| P | -3.18506500 | -0.48658100 | 1.58657000  |
| P | -1.37364500 | -1.07206700 | -1.99829800 |
| C | -4.75065800 | 0.35048500  | 1.06310600  |
| C | -6.00264900 | 0.01931500  | 1.60970000  |
| C | -4.68774200 | 1.33337100  | 0.06642000  |
| C | -7.15699300 | 0.67419500  | 1.18092000  |
| H | -6.07746500 | -0.75501300 | 2.36782100  |
| C | -5.84415100 | 1.98740600  | -0.36548300 |
| H | -3.73215900 | 1.56765900  | -0.39155300 |
| C | -7.07950400 | 1.66160100  | 0.19417300  |
| H | -8.11836500 | 0.41005700  | 1.61318600  |
| H | -5.77591000 | 2.74012400  | -1.14574900 |
| H | -7.98113500 | 2.16666700  | -0.14138500 |
| C | -2.99417200 | -0.02383200 | 3.37239200  |
| C | -1.90869400 | -0.57976600 | 4.07529600  |
| C | -3.83015200 | 0.88003100  | 4.04256700  |
| C | -1.67940600 | -0.25815500 | 5.41244600  |
| H | -1.24400700 | -1.27688000 | 3.56887200  |

|    |             |             |             |
|----|-------------|-------------|-------------|
| C  | -3.58999200 | 1.21570400  | 5.37924300  |
| H  | -4.67400600 | 1.32544000  | 3.52634700  |
| C  | -2.51974500 | 0.64661700  | 6.06892600  |
| H  | -0.84533700 | -0.71093000 | 5.94247500  |
| H  | -4.24918800 | 1.91915300  | 5.88078000  |
| H  | -2.34068800 | 0.90272900  | 7.10941400  |
| C  | -2.42356100 | 0.15823100  | -2.90272800 |
| C  | -3.43403800 | -0.21026400 | -3.80194900 |
| C  | -2.19314800 | 1.52660900  | -2.67474200 |
| C  | -4.19428500 | 0.76442700  | -4.45364300 |
| H  | -3.62998200 | -1.25971800 | -3.99717600 |
| C  | -2.94290300 | 2.50127900  | -3.33516100 |
| H  | -1.42509400 | 1.82756500  | -1.96615200 |
| C  | -3.95023900 | 2.11949900  | -4.22574500 |
| H  | -4.97665400 | 0.46076400  | -5.14384200 |
| H  | -2.74997300 | 3.55435900  | -3.14628800 |
| H  | -4.54085300 | 2.87452600  | -4.73708300 |
| C  | 0.14342800  | -1.15351500 | -3.07299000 |
| C  | 0.35560000  | -0.33090600 | -4.18994900 |
| C  | 1.13990100  | -2.08554000 | -2.72862400 |
| C  | 1.52896700  | -0.43940100 | -4.94486500 |
| H  | -0.40192000 | 0.38630700  | -4.48848500 |
| C  | 2.29551000  | -2.21274100 | -3.49955900 |
| H  | 1.00272500  | -2.73160200 | -1.86494800 |
| C  | 2.49791400  | -1.38558400 | -4.60995700 |
| H  | 1.66962200  | 0.20215000  | -5.81090800 |
| H  | 3.03236500  | -2.96590100 | -3.23275600 |
| H  | 3.39707400  | -1.48522400 | -5.21198800 |
| Pd | -1.12527000 | -0.12346000 | 0.30519600  |
| C  | -1.72482800 | 3.15055000  | 2.19474900  |
| H  | -2.49517000 | 2.56607200  | 1.68562100  |
| H  | -2.08298000 | 3.32504500  | 3.21875900  |
| C  | 0.91479900  | 0.59745900  | 0.91835200  |
| H  | 1.12212600  | 0.07106000  | 1.84959400  |
| C  | 1.85414700  | 0.29120100  | -0.19693400 |
| H  | 1.48282300  | 0.61368000  | -1.16947500 |
| H  | 2.08931600  | -0.77106900 | -0.24135600 |
| C  | 0.01315800  | 1.67052500  | 0.99896600  |
| H  | -0.06365300 | 2.30737200  | 0.11580100  |
| C  | -0.40981700 | 2.32963300  | 2.30487200  |
| H  | -0.58269200 | 1.53239200  | 3.03663200  |
| C  | 0.68669100  | 3.26128300  | 2.89897700  |
| H  | 1.65625400  | 2.74348700  | 2.91268000  |
| H  | 0.42896300  | 3.44681800  | 3.95192900  |
| C  | 0.78653600  | 4.61803900  | 2.18306100  |
| C  | -0.59383200 | 5.29914200  | 2.14703300  |
| H  | -0.90106200 | 5.53300400  | 3.17706600  |
| H  | -0.55255900 | 6.24837900  | 1.60342700  |
| N  | -1.62691800 | 4.45779600  | 1.54473000  |
| C  | -1.67862200 | 4.49316700  | 0.08804000  |
| H  | -0.69664400 | 4.32533100  | -0.39811000 |
| H  | -2.31670200 | 3.65869800  | -0.22941600 |
| C  | -2.25536100 | 5.78884800  | -0.46496700 |
| C  | -3.36077400 | 6.40020400  | 0.14166000  |
| C  | -1.72114900 | 6.36255200  | -1.62498200 |
| C  | -3.92185600 | 7.55365700  | -0.40637300 |
| H  | -3.76408700 | 5.96750600  | 1.05245800  |
| C  | -2.28413700 | 7.51497200  | -2.17962000 |
| H  | -0.85161900 | 5.90705300  | -2.09647800 |
| C  | -3.38765800 | 8.11342700  | -1.57059800 |
| H  | -4.77794300 | 8.01846600  | 0.07575600  |
| H  | -1.85462100 | 7.94894800  | -3.07877900 |
| H  | -3.82521100 | 9.01280500  | -1.99517800 |
| H  | 1.15658800  | 4.49295300  | 1.15582600  |

|   |            |             |             |
|---|------------|-------------|-------------|
| H | 1.50894300 | 5.26556800  | 2.69668700  |
| C | 4.05500300 | 0.65324900  | 1.17024600  |
| H | 4.90532600 | 1.33215900  | 1.18424800  |
| N | 3.32162000 | 0.98432200  | -0.14226700 |
| C | 4.02562900 | 0.50820100  | -1.42049300 |
| H | 3.55047100 | -0.43922700 | -1.66883500 |
| C | 3.03214900 | 2.49373200  | -0.16825300 |
| H | 2.48578500 | 2.68714900  | 0.75340600  |
| H | 2.32930800 | 2.62199500  | -0.99431100 |
| H | 3.34549800 | 0.97346900  | 1.94560300  |
| N | 4.52378700 | -0.69314700 | 1.35017500  |
| C | 5.88989400 | -0.66324200 | 1.96949300  |
| H | 6.51367300 | -0.05424000 | 1.30945500  |
| H | 5.84640600 | -0.15419600 | 2.94724400  |
| C | 3.58610500 | -1.60237200 | 2.04830200  |
| H | 2.78198300 | -1.02356400 | 2.52046200  |
| H | 4.12966800 | -2.07609600 | 2.87286000  |
| C | 6.55081400 | -2.01063100 | 2.16382500  |
| C | 7.14923100 | -2.68118400 | 1.08719200  |
| C | 6.62939400 | -2.58584500 | 3.43947300  |
| C | 7.79005600 | -3.90485900 | 1.27993000  |
| H | 7.12505800 | -2.23240200 | 0.09843500  |
| C | 7.26938800 | -3.81149400 | 3.63583700  |
| H | 6.19736900 | -2.06408600 | 4.29103300  |
| C | 7.84854100 | -4.47542800 | 2.55414700  |
| H | 8.25386300 | -4.41006600 | 0.43702700  |
| H | 7.32140200 | -4.24069800 | 4.63238600  |
| H | 8.35168100 | -5.42652500 | 2.70349500  |
| C | 2.97752700 | -2.71631500 | 1.20947700  |
| C | 3.69571400 | -3.34815500 | 0.18612100  |
| C | 1.70400800 | -3.20291500 | 1.53635000  |
| C | 3.15741900 | -4.45023800 | -0.48247900 |
| H | 4.68464900 | -2.98488500 | -0.07007400 |
| C | 1.16233500 | -4.30255000 | 0.86732100  |
| C | 1.89059700 | -4.93300600 | -0.14415300 |
| H | 3.73619000 | -4.94336200 | -1.25955300 |
| H | 1.47613100 | -5.79384100 | -0.66108800 |
| H | 3.71144100 | 1.22272100  | -2.18723700 |
| C | 4.17476000 | 3.46414000  | -0.31893600 |
| C | 4.85078200 | 3.96494200  | 0.80557000  |
| C | 4.51714500 | 3.96020400  | -1.58628400 |
| C | 5.87637400 | 4.90012600  | 0.66108800  |
| H | 4.56393600 | 3.63592900  | 1.80138700  |
| C | 5.53849800 | 4.89879400  | -1.73254200 |
| H | 3.97589200 | 3.61826300  | -2.46529900 |
| C | 6.22662100 | 5.36325400  | -0.60954900 |
| H | 6.38996200 | 5.27803700  | 1.54024700  |
| H | 5.79107400 | 5.27221000  | -2.72045600 |
| H | 7.01988300 | 6.09648000  | -0.72175800 |
| C | 5.52908700 | 0.29410400  | -1.49688100 |
| C | 5.94005100 | -0.86873600 | -2.17028000 |
| C | 6.51652300 | 1.20494100  | -1.09301800 |
| C | 7.28653200 | -1.11299100 | -2.44101600 |
| H | 5.19276900 | -1.58466400 | -2.50140700 |
| C | 7.86774700 | 0.94879400  | -1.34185800 |
| H | 6.24952800 | 2.12388200  | -0.58905400 |
| C | 8.25975100 | -0.20462100 | -2.02139900 |
| H | 7.57283500 | -2.01473700 | -2.97512300 |
| H | 8.61340700 | 1.66687000  | -1.01258300 |
| H | 9.31017000 | -0.39192800 | -2.22378800 |
| H | 1.13083600 | -2.72494000 | 2.32809200  |
| H | 0.17562000 | -4.66699600 | 1.13921000  |

### TS14

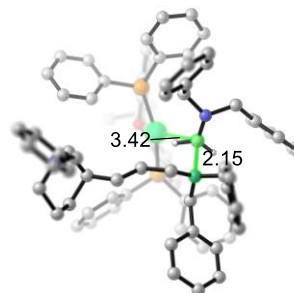

|   |             |             |             |
|---|-------------|-------------|-------------|
| C | -5.40682600 | 0.07015200  | -1.30528800 |
| C | -6.80898200 | 0.05720900  | -1.34669000 |
| C | -7.46210500 | 1.21051300  | -1.79007600 |
| C | -6.73862100 | 2.32850200  | -2.20328300 |
| C | -5.34637400 | 2.30607500  | -2.17987400 |
| C | -4.64303600 | 1.17745800  | -1.72678700 |
| H | -8.54541100 | 1.24000000  | -1.82401800 |
| H | -7.26061600 | 3.21573900  | -2.54935200 |
| H | -4.79503600 | 3.18161400  | -2.50601600 |
| C | -7.52226400 | -1.24608200 | -0.96829500 |
| C | -9.00288600 | -1.01657700 | -0.62096700 |
| H | -9.49438500 | -1.96298000 | -0.37743400 |
| H | -9.12517700 | -0.33493700 | 0.22760100  |
| H | -9.54131100 | -0.60248800 | -1.47837200 |
| C | -7.44690100 | -2.21767000 | -2.18288900 |
| H | -7.92110000 | -3.17318900 | -1.93244900 |
| H | -7.96846800 | -1.78623100 | -3.04463100 |
| H | -6.41111900 | -2.41633800 | -2.47390000 |
| C | -6.74553500 | -1.86835600 | 0.19708600  |
| C | -7.33717500 | -2.58194900 | 1.24277600  |
| C | -5.34604000 | -1.76632400 | 0.17840400  |
| C | -6.55754900 | -3.19319700 | 2.22407700  |
| H | -8.41639200 | -2.67310300 | 1.29354300  |
| C | -4.52752000 | -2.37002200 | 1.15362500  |
| C | -5.17013800 | -3.09184800 | 2.17381700  |
| H | -7.03232700 | -3.74968500 | 3.02677600  |
| H | -4.57546900 | -3.56364300 | 2.94897100  |
| O | -4.74366800 | -1.05192700 | -0.84111200 |
| P | -2.78491900 | 1.15515200  | -1.68593300 |
| P | -2.67654900 | -2.21725000 | 1.10768100  |
| C | -2.32762100 | 0.59048500  | -3.38625700 |
| C | -3.20936200 | 0.63350500  | -4.47720700 |
| C | -1.02931100 | 0.09296600  | -3.58736500 |
| C | -2.79866300 | 0.19519000  | -5.73842200 |
| H | -4.22080500 | 1.00450600  | -4.34465700 |
| C | -0.61651700 | -0.33353800 | -4.84959700 |
| H | -0.34638500 | 0.02923000  | -2.74335100 |
| C | -1.50242900 | -0.28574300 | -5.92855300 |
| H | -3.49486200 | 0.22969200  | -6.57196000 |
| H | 0.39199500  | -0.71376800 | -4.98866500 |
| H | -1.18613100 | -0.62744500 | -6.91019500 |
| C | -2.37896300 | 2.96396500  | -1.70435000 |
| C | -2.38815500 | 3.64163200  | -0.47238200 |
| C | -2.04795200 | 3.67979000  | -2.86467500 |
| C | -2.10066500 | 5.00523900  | -0.40556600 |
| H | -2.62723600 | 3.09491200  | 0.43712900  |
| C | -1.74721900 | 5.04338200  | -2.79532700 |
| H | -2.02956600 | 3.17638200  | -3.82637200 |
| C | -1.77968600 | 5.71044400  | -1.56982900 |
| H | -2.12325300 | 5.51296100  | 0.55514300  |
| H | -1.49358300 | 5.58364200  | -3.70330500 |
| H | -1.55695600 | 6.77296400  | -1.52130500 |



|    |             |             |             |          |             |             |             |
|----|-------------|-------------|-------------|----------|-------------|-------------|-------------|
| C  | -2.13116200 | -3.77876300 | 0.28016500  | C        | 1.54869900  | 2.78054600  | -0.63807000 |
| C  | -2.81008400 | -5.00025200 | 0.41847100  | H        | 0.66964000  | 3.31549100  | -0.26416800 |
| C  | -0.97916500 | -3.73360700 | -0.52087700 | H        | 1.17822200  | 1.95354200  | -1.25132000 |
| C  | -2.33937400 | -6.14848800 | -0.21988600 | H        | 0.33039500  | 0.59198200  | 0.73697100  |
| H  | -3.71397000 | -5.05660600 | 1.01703700  | N        | 0.71544200  | 0.79529300  | 2.75572500  |
| C  | -0.50523400 | -4.88411500 | -1.15417600 | C        | 0.48307700  | 1.56523800  | 4.01309600  |
| H  | -0.46925800 | -2.78312500 | -0.65920800 | H        | -0.04392700 | 0.86802700  | 4.67480900  |
| C  | -1.18469600 | -6.09399100 | -1.00433700 | H        | 1.44928400  | 1.77720400  | 4.48014000  |
| H  | -2.87726600 | -7.08573500 | -0.10671200 | C        | 1.02874400  | -0.64848500 | 2.95255500  |
| H  | 0.38678800  | -4.83286800 | -1.77309500 | H        | 0.97427900  | -1.11853300 | 1.96872400  |
| H  | -0.82214600 | -6.98898900 | -1.50225700 | H        | 0.21236900  | -1.06051100 | 3.55440900  |
| C  | -2.23585400 | -2.48351700 | 2.89004400  | C        | -0.33216800 | 2.83007100  | 3.87400000  |
| C  | -1.43164400 | -3.54262200 | 3.33467300  | C        | -1.70301500 | 2.75952100  | 3.57872600  |
| C  | -2.64761500 | -1.51361300 | 3.82348800  | C        | 0.24764100  | 4.08238700  | 4.11155200  |
| C  | -1.04599100 | -3.62887400 | 4.67726200  | C        | -2.47407500 | 3.91999500  | 3.51728000  |
| H  | -1.10882000 | -4.30834500 | 2.63638500  | H        | -2.16638600 | 1.79161800  | 3.40171000  |
| C  | -2.27419400 | -1.60711100 | 5.16382300  | C        | -0.52383900 | 5.24587900  | 4.05259800  |
| H  | -3.27816700 | -0.68987500 | 3.49625600  | H        | 1.30353400  | 4.14917400  | 4.36255500  |
| C  | -1.46503800 | -2.66536000 | 5.59494900  | C        | -1.88514100 | 5.16636700  | 3.75520000  |
| H  | -0.42467400 | -4.45842900 | 5.00380300  | H        | -3.53621400 | 3.85136800  | 3.29961400  |
| H  | -2.62073000 | -0.86087000 | 5.87446500  | H        | -0.06294800 | 6.20945800  | 4.24976200  |
| H  | -1.17448400 | -2.74124400 | 6.63910700  | H        | -2.48925100 | 6.06870300  | 3.72245600  |
| Pd | -2.10622900 | -0.28000200 | -0.00796700 | C        | 2.36407200  | -0.94590300 | 3.61074700  |
| C  | 3.57438400  | -3.07824200 | -2.08130400 | C        | 2.52551300  | -0.84379300 | 5.00092900  |
| H  | 3.41511400  | -3.22422300 | -1.00672900 | C        | 3.44912100  | -1.39183600 | 2.84245700  |
| H  | 2.99853600  | -3.85799100 | -2.60393700 | C        | 3.75178400  | -1.13402700 | 5.60043200  |
| C  | 2.66563200  | -0.01277900 | -0.68231700 | H        | 1.68266200  | -0.55877900 | 5.62498400  |
| H  | 1.67521400  | -0.42543300 | -0.48692400 | C        | 4.67538300  | -1.69076400 | 3.44029500  |
| C  | 3.17535700  | 1.07045800  | 0.23127300  | C        | 4.83226800  | -1.55212300 | 4.82042300  |
| H  | 4.08951700  | 1.50754100  | -0.18765400 | H        | 3.85846100  | -1.04897800 | 6.67813100  |
| H  | 3.45842400  | 0.64245600  | 1.20009000  | H        | 5.78410800  | -1.78669100 | 5.28810600  |
| C  | 3.40022300  | -0.55150200 | -1.66588100 | H        | 2.52292000  | 2.64366700  | 2.54218800  |
| H  | 4.39317900  | -0.13920200 | -1.85285300 | C        | 2.36445500  | 3.73370800  | -1.49058400 |
| C  | 2.96843700  | -1.70725500 | -2.53011700 | C        | 2.08894000  | 5.10790300  | -1.44629600 |
| H  | 1.87749800  | -1.80637800 | -2.42900000 | C        | 3.35841400  | 3.27638200  | -2.36863300 |
| C  | 3.31075200  | -1.48615400 | -4.02525400 | C        | 2.80793900  | 6.00884700  | -2.23470100 |
| H  | 2.98752600  | -0.48824600 | -4.34806000 | H        | 1.29219000  | 5.47292700  | -0.80260900 |
| H  | 2.73156800  | -2.21071400 | -4.61589200 | C        | 4.08342800  | 4.17498100  | -3.15162000 |
| C  | 4.80602500  | -1.69981500 | -4.31760000 | H        | 3.55221900  | 2.21137600  | -2.45427200 |
| C  | 5.26579100  | -3.07806700 | -3.80863700 | C        | 3.81499100  | 5.54430000  | -3.08253200 |
| H  | 4.74717400  | -3.86128300 | -4.38095800 | H        | 2.57761200  | 7.06978800  | -2.19084200 |
| H  | 6.33806800  | -3.22115600 | -3.97175800 | H        | 4.85206500  | 3.80527800  | -3.82465600 |
| N  | 4.97850800  | -3.29724200 | -2.38674900 | H        | 4.37683700  | 6.24194500  | -3.69706000 |
| C  | 5.94957200  | -2.71516200 | -1.46225500 | C        | 4.23271700  | 3.42896200  | 1.56978300  |
| H  | 6.13306800  | -1.63746400 | -1.62991600 | C        | 5.09842400  | 2.68241700  | 2.38517000  |
| H  | 5.51210200  | -2.79090900 | -0.45670000 | C        | 4.76429900  | 4.49802200  | 0.83502100  |
| C  | 7.28764700  | -3.43755100 | -1.47980800 | C        | 6.46055200  | 2.97764500  | 2.44778200  |
| C  | 7.34315700  | -4.83808900 | -1.48048200 | H        | 4.70307500  | 1.86455400  | 2.98433600  |
| C  | 8.48580000  | -2.71538400 | -1.45239800 | C        | 6.12582800  | 4.79840500  | 0.90033100  |
| C  | 8.57068000  | -5.49882200 | -1.44835400 | H        | 4.11511900  | 5.10318200  | 0.21191300  |
| H  | 6.41474900  | -5.40039500 | -1.52142200 | C        | 6.97883800  | 4.03783000  | 1.70200100  |
| C  | 9.71744200  | -3.37426100 | -1.41622100 | H        | 7.11222300  | 2.38744800  | 3.08602900  |
| H  | 8.45664500  | -1.62732400 | -1.46084500 | H        | 6.51796300  | 5.63325300  | 0.32630100  |
| C  | 9.76236400  | -4.76874500 | -1.41371000 | H        | 8.03764000  | 4.27560800  | 1.75296100  |
| H  | 8.59934300  | -6.58531700 | -1.45111600 | H        | 3.32952000  | -1.53046700 | 1.77046300  |
| H  | 10.63885100 | -2.79822800 | -1.39845300 | H        | 5.50212800  | -2.04249500 | 2.82951200  |
| H  | 10.71840500 | -5.28456100 | -1.39037900 |          |             |             |             |
| H  | 5.40581900  | -0.90892500 | -3.84683300 | <b>3</b> |             |             |             |
| H  | 4.99084100  | -1.62320300 | -5.39619100 | C        | -3.31381400 | -1.18392100 | -1.83361400 |
| C  | 0.50731100  | 1.29014800  | 1.54785500  | H        | -3.21000300 | -0.32172500 | -2.50170500 |
| H  | 0.01111000  | 2.24920200  | 1.48693400  | H        | -3.65343300 | -2.03133800 | -2.44911900 |
| N  | 2.20198200  | 2.14848200  | 0.54810500  | C        | -0.01304200 | 0.06516800  | -1.20398200 |
| C  | 2.74535900  | 3.10172300  | 1.57387400  | H        | 0.42659600  | -0.41797500 | -2.07836000 |
| H  | 2.14855600  | 4.01492700  | 1.50021100  |          |             |             |             |

|   |             |             |             |
|---|-------------|-------------|-------------|
| C | 0.74539700  | 1.25508000  | -0.68285100 |
| H | 0.20344300  | 1.70260100  | 0.17308400  |
| H | 0.77474600  | 2.02277800  | -1.46789500 |
| C | -1.15417900 | -0.40700200 | -0.68920000 |
| H | -1.56370000 | 0.08446100  | 0.19439000  |
| C | -1.92320200 | -1.57771500 | -1.24749400 |
| H | -1.33502800 | -1.98347500 | -2.08297300 |
| C | -2.12609200 | -2.70981000 | -0.20775800 |
| H | -1.17677200 | -2.93604800 | 0.29233800  |
| H | -2.42280800 | -3.62099500 | -0.74838600 |
| C | -3.22126100 | -2.37138200 | 0.81697300  |
| C | -4.53003900 | -1.99720100 | 0.09811200  |
| H | -4.89935600 | -2.87841200 | -0.44825000 |
| H | -5.30956300 | -1.71729100 | 0.81403400  |
| N | -4.37222000 | -0.90505700 | -0.86678100 |
| C | -4.40332900 | 0.43419100  | -0.28557400 |
| H | -3.71558000 | 0.56589300  | 0.57005200  |
| H | -4.05082200 | 1.12889900  | -1.05972700 |
| C | -5.79862500 | 0.85312500  | 0.15614900  |
| C | -6.92049800 | 0.54918000  | -0.62674400 |
| C | -5.97973800 | 1.59022900  | 1.33191500  |
| C | -8.19112600 | 0.97877200  | -0.24445100 |
| H | -6.78242800 | -0.03952800 | -1.52883700 |
| C | -7.25023200 | 2.02622800  | 1.71586500  |
| H | -5.11796900 | 1.82500300  | 1.95391600  |
| C | -8.36058500 | 1.72134600  | 0.92752300  |
| H | -9.05202000 | 0.73412300  | -0.86179200 |
| H | -7.37192000 | 2.59636200  | 2.63339600  |
| H | -9.35118700 | 2.05501900  | 1.22540600  |
| H | -2.89897800 | -1.54244200 | 1.46156400  |
| H | -3.39544000 | -3.22841000 | 1.48039900  |
| N | 2.14507000  | 0.93081700  | -0.35236500 |
| C | 2.95761500  | 2.14900800  | -0.23887400 |
| H | 2.66478200  | 2.80411800  | -1.06990600 |
| C | 2.23402100  | 0.07576300  | 0.84232300  |
| H | 1.29834600  | -0.49288400 | 0.89411300  |
| H | 2.27641400  | 0.68816900  | 1.76219000  |
| H | 2.72043600  | 2.70364600  | 0.69053900  |
| C | 3.37712700  | -0.92401400 | 0.84708800  |
| C | 3.58962700  | -1.76848600 | -0.25110700 |
| C | 4.18042900  | -1.08513500 | 1.98028800  |
| C | 4.58298300  | -2.74559800 | -0.21665600 |
| H | 2.97425600  | -1.64305500 | -1.13765400 |
| C | 5.17554600  | -2.06512000 | 2.02091900  |
| H | 4.02925600  | -0.43463400 | 2.83927000  |
| C | 5.38003200  | -2.89897900 | 0.92170000  |
| H | 4.73601900  | -3.39108000 | -1.07818800 |
| H | 5.79308500  | -2.17117200 | 2.90928800  |
| H | 6.15491300  | -3.66072700 | 0.94865500  |
| C | 4.45819500  | 1.93589300  | -0.31311800 |
| C | 5.03046200  | 1.25603600  | -1.39684600 |
| C | 5.30305500  | 2.48037800  | 0.65911500  |
| C | 6.41320300  | 1.12038600  | -1.50068200 |
| H | 4.37885600  | 0.82092700  | -2.14928300 |
| C | 6.69075600  | 2.35066400  | 0.55718600  |
| H | 4.87133600  | 3.01194700  | 1.50475400  |
| C | 7.24952200  | 1.66937600  | -0.52368000 |
| H | 6.84159200  | 0.58573400  | -2.34469000 |
| H | 7.33157500  | 2.77874900  | 1.32386700  |
| H | 8.32815600  | 1.56367300  | -0.60561700 |

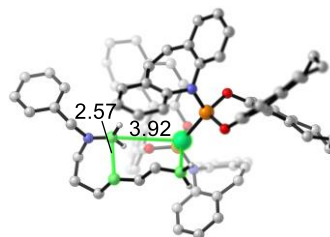

|   |             |             |             |
|---|-------------|-------------|-------------|
| C | 3.14629000  | -1.83349200 | 1.69673000  |
| H | 2.30326000  | -2.43975100 | 1.37629400  |
| H | 3.07416700  | -0.75304400 | 1.62740100  |
| C | 0.13990400  | -1.22969100 | 3.59259600  |
| H | 0.06407900  | -2.30820900 | 3.45890100  |
| C | -1.01371400 | -0.48357900 | 3.54368500  |
| H | -1.01242400 | 0.56814500  | 3.82300800  |
| H | -1.98248700 | -0.96724900 | 3.49184200  |
| C | 1.44341400  | -0.70068800 | 3.92304900  |
| H | 1.52270000  | 0.38423000  | 3.98252300  |
| C | 2.55017200  | -1.45367700 | 4.17039600  |
| H | 2.44278800  | -2.53862900 | 4.22421500  |
| C | 3.87439300  | -0.86518800 | 4.61241900  |
| H | 3.92142100  | -0.87735000 | 5.71203900  |
| H | 3.91283100  | 0.19372300  | 4.32359000  |
| C | 5.15190300  | -1.57898600 | 4.11292800  |
| C | 5.35729800  | -1.60803000 | 2.59000400  |
| H | 5.32490900  | -0.60098400 | 2.16379500  |
| H | 6.31426000  | -2.06288100 | 2.32397500  |
| N | 4.28527600  | -2.40369400 | 1.94552500  |
| C | 4.45666600  | -3.87774000 | 1.90228000  |
| H | 4.67127100  | -4.22072200 | 2.91988600  |
| H | 3.49063700  | -4.29489600 | 1.60581500  |
| C | 5.56447900  | -4.29564400 | 0.95920100  |
| C | 5.43330800  | -4.09502300 | -0.42252300 |
| C | 6.72357100  | -4.90301000 | 1.45611500  |
| C | 6.44775100  | -4.49554000 | -1.29049800 |
| H | 4.53514900  | -3.62889600 | -0.82231000 |
| C | 7.73916800  | -5.30673700 | 0.58614300  |
| H | 6.82975200  | -5.07337700 | 2.52517400  |
| C | 7.60267400  | -5.10182000 | -0.78697700 |
| H | 6.33537800  | -4.34137500 | -2.35971800 |
| H | 8.63180200  | -5.78182200 | 0.98205000  |
| H | 8.39041400  | -5.41685100 | -1.46494000 |
| H | 5.18190700  | -2.60408700 | 4.50537000  |
| H | 6.02386900  | -1.07010400 | 4.54003100  |
| C | 3.93356900  | 1.88663300  | -1.15080700 |
| C | 3.75286100  | 1.84490500  | 0.23923000  |
| C | 4.58413200  | 2.55949700  | 1.10226600  |
| C | 5.56621400  | 3.38275900  | 0.56545000  |
| C | 5.69361600  | 3.55374100  | -0.82062200 |
| C | 4.86345900  | 2.81635500  | -1.68846900 |
| C | 3.10158700  | 0.99724600  | -2.01929300 |
| C | 1.70327900  | 1.09522000  | -1.94049600 |
| C | 0.86860400  | 0.37911100  | -2.79323300 |
| C | 1.44316500  | -0.45976300 | -3.74045600 |
| C | 2.82911400  | -0.65222300 | -3.80145900 |
| C | 3.66631600  | 0.04988700  | -2.91064400 |
| H | 4.43989800  | 2.47811600  | 2.17541800  |
| H | 6.21924100  | 3.94308200  | 1.23091700  |
| H | -0.20675100 | 0.48198700  | -2.70300000 |
| H | 0.80139100  | -0.99690700 | -4.43479200 |
| C | 3.38942000  | -1.58396800 | -4.86699700 |
| H | 3.41051200  | -1.03989700 | -5.82354600 |
| H | 2.70135700  | -2.42471000 | -5.02090100 |

TS11-Si

|   |             |             |             |    |              |             |             |
|---|-------------|-------------|-------------|----|--------------|-------------|-------------|
| C | 5.14573100  | -0.31108600 | -2.83000100 | H  | -3.44106800  | 3.69815300  | -2.56507100 |
| H | 5.74947000  | 0.54847000  | -2.53504600 | C  | -5.76987800  | 4.39024300  | -1.40362500 |
| H | 5.26361000  | -1.03816000 | -2.00933500 | H  | -6.31698800  | 4.40716300  | -2.35879800 |
| C | 5.69851700  | -0.94237800 | -4.11298300 | H  | -5.03204200  | 5.19977400  | -1.47187600 |
| H | 5.75000000  | -0.18609000 | -4.90897000 | C  | -6.77299800  | 2.23204100  | 0.38068600  |
| H | 6.72478300  | -1.28829100 | -3.94001100 | H  | -7.38708200  | 1.33718200  | 0.49161200  |
| C | 4.80164200  | -2.09719500 | -4.56653400 | H  | -6.36412900  | 2.42355300  | 1.38570900  |
| H | 4.75923800  | -2.85616600 | -3.77056500 | C  | -7.63672400  | 3.43126200  | -0.02660700 |
| H | 5.21437600  | -2.59276600 | -5.45298300 | H  | -8.19522400  | 3.19602400  | -0.94418200 |
| C | 4.91332500  | 3.06648000  | -3.19154700 | H  | -8.38080100  | 3.62813300  | 0.75424000  |
| H | 5.46543100  | 2.26071300  | -3.69405000 | C  | -6.75969400  | 4.66287700  | -0.26596000 |
| H | 3.89564100  | 3.02328100  | -3.59497000 | H  | -6.21210500  | 4.90204500  | 0.65683300  |
| C | 6.70093800  | 4.57554300  | -1.32923700 | H  | -7.37086900  | 5.54039600  | -0.50720200 |
| H | 7.65104200  | 4.44245000  | -0.79560900 | C  | -7.48999000  | -0.41228500 | -1.61862100 |
| H | 6.34453600  | 5.57918300  | -1.05310900 | H  | -7.97082600  | 0.54424400  | -1.37420400 |
| C | 6.92412700  | 4.52901800  | -2.84433900 | H  | -6.72408800  | -0.17520000 | -2.36539500 |
| C | 5.57805600  | 4.39878400  | -3.56015600 | C  | -8.75484200  | -2.65914000 | -0.10440600 |
| H | 5.70257600  | 4.45435800  | -4.64768600 | H  | -9.36691800  | -2.81854700 | 0.79278300  |
| H | 4.92595200  | 5.23554800  | -3.27253700 | H  | -8.58308100  | -3.66063200 | -0.52715300 |
| H | 7.55825300  | 3.67008600  | -3.10597800 | C  | -9.51565800  | -1.81285800 | -1.13001700 |
| H | 7.46123200  | 5.42779400  | -3.16784100 | C  | -8.55396200  | -1.33829900 | -2.22129900 |
| O | 1.13545400  | 1.96083400  | -1.01261600 | H  | -9.09015100  | -0.80733600 | -3.01641400 |
| O | 2.73320500  | 1.07201700  | 0.78873100  | H  | -8.07237600  | -2.20835100 | -2.69037900 |
| P | 1.06962900  | 1.48253000  | 0.58303200  | H  | -9.96446300  | -0.93851700 | -0.63795100 |
| N | 0.86175800  | 3.06440400  | 1.20111200  | H  | -10.34175800 | -2.39565200 | -1.55333400 |
| C | 0.74339200  | 4.26520800  | 0.41101900  | O  | -2.96978000  | -0.57127300 | -1.12916300 |
| C | -0.54265000 | 4.77811100  | 0.13004900  | O  | -3.55362400  | -0.85786100 | 1.36047100  |
| C | 1.88281300  | 4.90169200  | -0.08609600 | P  | -2.26608800  | -1.07433800 | 0.29549200  |
| C | -0.63693000 | 5.90502900  | -0.70943400 | N  | -2.20041600  | -2.72768600 | -0.18194500 |
| C | 1.76328800  | 6.02810700  | -0.89816200 | C  | -2.78487600  | -3.28389700 | -1.37890200 |
| H | 2.85886000  | 4.49793000  | 0.15606500  | C  | -1.95816800  | -3.55221200 | -2.49285500 |
| C | 0.49770000  | 6.52675600  | -1.21877800 | C  | -4.15691400  | -3.53345500 | -1.45065300 |
| H | -1.62230900 | 6.30101200  | -0.94235700 | C  | -2.56319100  | -3.99711800 | -3.68374100 |
| H | 2.65631900  | 6.50930500  | -1.28707500 | C  | -4.73063500  | -3.99715000 | -2.63386600 |
| H | 0.39780000  | 7.39931100  | -1.85796700 | H  | -4.77338200  | -3.34620500 | -0.58026700 |
| C | 0.45659500  | 3.19352200  | 2.57543800  | C  | -3.93383400  | -4.21765000 | -3.75987000 |
| C | 1.41814100  | 3.11196100  | 3.58904900  | H  | -1.93418700  | -4.18984700 | -4.54941500 |
| C | -0.90460800 | 3.38670200  | 2.90011200  | H  | -5.80146900  | -4.17464200 | -2.67699400 |
| C | 1.04544300  | 3.17013700  | 4.93218300  | H  | -4.37760600  | -4.56690400 | -4.68763600 |
| H | 2.46051300  | 3.00937800  | 3.30471900  | C  | -1.32862300  | -3.60733600 | 0.53951800  |
| C | -1.26186100 | 3.41649700  | 4.26301700  | C  | -1.69401100  | -4.05270600 | 1.81573100  |
| C | -0.30474400 | 3.30973700  | 5.26815900  | C  | -0.10178600  | -4.02185400 | -0.03109700 |
| H | 1.80083800  | 3.10739500  | 5.71046100  | C  | -0.85149300  | -4.88233800 | 2.55600000  |
| H | -2.30833700 | 3.55079100  | 4.52519600  | H  | -2.65422500  | -3.74228200 | 2.21510800  |
| H | -0.60752400 | 3.35085100  | 6.31051900  | C  | 0.73499100   | -4.85901900 | 0.73594000  |
| C | -1.76941700 | 4.21302000  | 0.68819000  | C  | 0.37118300   | -5.28690700 | 2.01107500  |
| H | -2.66859200 | 4.39279100  | 0.10447300  | H  | -1.15371900  | -5.22239700 | 3.54237800  |
| C | -1.93119400 | 3.60171000  | 1.88366800  | H  | 1.66040500   | -5.21711200 | 0.28789800  |
| H | -2.94598100 | 3.34172500  | 2.17832800  | H  | 1.02228500   | -5.95627200 | 2.56723500  |
| C | -5.55521400 | -0.49892000 | 0.04655600  | C  | -0.50309800  | -3.44539900 | -2.44912300 |
| C | -4.86277100 | -1.20294700 | 1.03922500  | H  | -0.01915900  | -3.29550400 | -3.41231600 |
| C | -5.45538300 | -2.25275000 | 1.73999600  | C  | 0.30509000   | -3.65483600 | -1.38576500 |
| C | -6.73542100 | -2.65822000 | 1.38676200  | H  | 1.37807600   | -3.66183400 | -1.57209000 |
| C | -7.41107200 | -2.07268600 | 0.30545500  | Pd | -0.38607400  | -0.16624300 | 1.33293200  |
| C | -6.81623100 | -0.99679300 | -0.38192200 |    |              |             |             |
| C | -4.93825000 | 0.71994900  | -0.56305800 |    |              |             |             |
| C | -3.68065200 | 0.62441700  | -1.17961800 |    |              |             |             |
| C | -3.13586300 | 1.68383000  | -1.89926100 |    |              |             |             |
| C | -3.84625200 | 2.87476600  | -1.98107900 |    |              |             |             |
| C | -5.05159100 | 3.05265700  | -1.28944400 |    |              |             |             |
| C | -5.58527600 | 1.98299900  | -0.54270900 |    |              |             |             |
| H | -4.90867200 | -2.73499400 | 2.54442300  |    |              |             |             |
| H | -7.20980300 | -3.47175000 | 1.93105700  |    |              |             |             |
| H | -2.17267500 | 1.56521400  | -2.38273400 |    |              |             |             |

**TS11-Re**

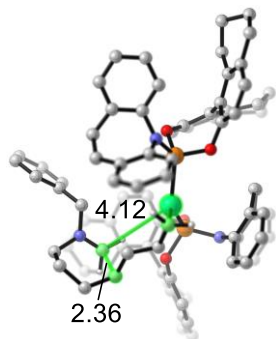

|    |             |             |             |
|----|-------------|-------------|-------------|
| Pd | 0.18511500  | 0.54282400  | 1.51521500  |
| C  | -3.05988200 | 2.87304500  | 0.49424500  |
| H  | -2.55111800 | 1.92842900  | 0.35597800  |
| H  | -4.10988700 | 2.85312300  | 0.76318400  |
| C  | -0.91428500 | 1.58363900  | 3.26979400  |
| H  | -1.57086500 | 0.81200200  | 3.65902500  |
| C  | 0.47056500  | 1.50026100  | 3.47015200  |
| H  | 1.07605400  | 2.39678600  | 3.40565400  |
| H  | 0.88129100  | 0.69631000  | 4.07623100  |
| C  | -1.52132700 | 2.83846000  | 2.88786400  |
| H  | -0.81749000 | 3.64248800  | 2.66316700  |
| C  | -2.86304100 | 3.10893100  | 2.83908100  |
| H  | -3.53737500 | 2.30036000  | 3.12039900  |
| C  | -3.49063600 | 4.50077800  | 2.84203300  |
| H  | -3.42715400 | 4.90463100  | 3.86202400  |
| H  | -4.56696600 | 4.39974100  | 2.64326500  |
| C  | -2.91389900 | 5.55236300  | 1.87023900  |
| C  | -3.19442100 | 5.25480900  | 0.38864800  |
| H  | -4.27220400 | 5.17250700  | 0.21017000  |
| H  | -2.80504200 | 6.03761300  | -0.26520900 |
| N  | -2.56698200 | 3.97752400  | -0.00735800 |
| C  | -1.18346000 | 4.02685900  | -0.54045400 |
| H  | -0.55531100 | 4.54972700  | 0.18918000  |
| H  | -0.82287700 | 2.99586700  | -0.59135700 |
| C  | -1.11797700 | 4.71390300  | -1.88731600 |
| C  | -1.62316500 | 4.07784200  | -3.03008200 |
| C  | -0.54981800 | 5.98840200  | -2.00956000 |
| C  | -1.55982400 | 4.70986100  | -4.27135800 |
| H  | -2.05974500 | 3.08509200  | -2.94883600 |
| C  | -0.48586300 | 6.62133100  | -3.25344900 |
| H  | -0.14736000 | 6.48727200  | -1.13024000 |
| C  | -0.99274000 | 5.98256900  | -4.38550400 |
| H  | -1.94726200 | 4.20773900  | -5.15344300 |
| H  | -0.04039000 | 7.60847100  | -3.33581700 |
| H  | -0.94274200 | 6.47099900  | -5.35431700 |
| H  | -1.83533800 | 5.67720000  | 2.02751600  |
| H  | -3.36859000 | 6.52359800  | 2.09659200  |
| C  | -4.84455100 | -0.96373100 | -0.03753000 |
| C  | -4.27912400 | -0.71738200 | 1.22002200  |
| C  | -4.94681200 | -1.04966100 | 2.39812700  |
| C  | -6.16716900 | -1.70788400 | 2.31376100  |
| C  | -6.70067200 | -2.09818900 | 1.07589200  |
| C  | -6.03124000 | -1.74074000 | -0.11088500 |
| C  | -4.15311600 | -0.43456900 | -1.25357900 |
| C  | -2.81885200 | -0.80259000 | -1.49688600 |
| C  | -2.16322700 | -0.43840500 | -2.67000900 |
| C  | -2.83733900 | 0.33828300  | -3.60492500 |
| C  | -4.13419300 | 0.81095200  | -3.36063300 |
| C  | -4.78813000 | 0.45070800  | -2.16423800 |
| H  | -4.49948600 | -0.80395100 | 3.35631100  |
| H  | -6.69903400 | -1.96936800 | 3.22578700  |
| H  | -1.14988100 | -0.78527900 | -2.83056500 |

|   |             |             |             |
|---|-------------|-------------|-------------|
| H | -2.34413200 | 0.60079800  | -4.53852700 |
| C | -4.81362200 | 1.65992300  | -4.42643500 |
| H | -5.18914800 | 0.98810900  | -5.21315100 |
| H | -4.06936000 | 2.30075700  | -4.91620300 |
| C | -6.11387000 | 1.11577500  | -1.80671100 |
| H | -6.74167300 | 0.45564000  | -1.20711000 |
| H | -5.88692400 | 1.97008800  | -1.14628300 |
| C | -6.89028000 | 1.64373100  | -3.01834300 |
| H | -7.28068100 | 0.80066300  | -3.60567800 |
| H | -7.75866900 | 2.21849200  | -2.67544600 |
| C | -5.98069700 | 2.50206700  | -3.90061800 |
| H | -5.59546900 | 3.34710200  | -3.31153400 |
| H | -6.53842100 | 2.93135400  | -4.74075700 |
| C | -6.53366700 | -2.24609000 | -1.45858300 |
| H | -7.05610200 | -1.44415500 | -1.99778700 |
| H | -5.67337300 | -2.51093000 | -2.08336300 |
| C | -7.96842200 | -2.94027900 | 1.07309700  |
| H | -8.69763200 | -2.49700900 | 1.76360200  |
| H | -7.72787400 | -3.92884900 | 1.49186400  |
| C | -8.58856200 | -3.12773500 | -0.31560900 |
| C | -7.49091100 | -3.43865500 | -1.33507800 |
| H | -7.91865300 | -3.66520200 | -2.31845600 |
| H | -6.93514300 | -4.33221400 | -1.01744700 |
| H | -9.11670700 | -2.21277700 | -0.61931500 |
| H | -9.33723800 | -3.92721600 | -0.28229200 |
| O | -2.13511100 | -1.59046900 | -0.58133500 |
| O | -3.02842200 | -0.11428400 | 1.31026900  |
| P | -1.59630500 | -0.92604400 | 0.85462500  |
| N | -1.53219500 | -2.40515100 | 1.69523900  |
| C | -1.93957200 | -3.68924500 | 1.17415300  |
| C | -0.96144900 | -4.53957900 | 0.61392000  |
| C | -3.27865100 | -4.08238500 | 1.21410100  |
| C | -1.38788500 | -5.75308400 | 0.04122100  |
| C | -3.67277400 | -5.29958700 | 0.66044900  |
| H | -4.00816400 | -3.42377900 | 1.66928000  |
| C | -2.72520400 | -6.13352700 | 0.06131200  |
| H | -0.64464600 | -6.40922200 | -0.40505600 |
| H | -4.71885100 | -5.59137100 | 0.69072000  |
| H | -3.02727100 | -7.07909000 | -0.37986300 |
| C | -0.71373300 | -2.45913700 | 2.87955300  |
| C | -1.23003700 | -2.00919900 | 4.09955600  |
| C | 0.60637200  | -2.95366700 | 2.79851100  |
| C | -0.43311800 | -1.99242400 | 5.24347100  |
| H | -2.26331800 | -1.67735800 | 4.13661700  |
| C | 1.40046500  | -2.90480200 | 3.96062100  |
| C | 0.89298300  | -2.43178300 | 5.16695800  |
| H | -0.84181200 | -1.64039200 | 6.18639500  |
| H | 2.42421200  | -3.26587800 | 3.90770000  |
| H | 1.52296600  | -2.42080400 | 6.05200100  |
| C | 0.46722800  | -4.23469600 | 0.63674200  |
| H | 1.05109300  | -4.71097800 | -0.14801100 |
| C | 1.15064600  | -3.54764900 | 1.57970600  |
| H | 2.23335500  | -3.51284900 | 1.49021100  |
| C | 4.56477900  | -1.68309000 | -0.56572900 |
| C | 4.36231900  | -1.26132700 | 0.75446600  |
| C | 5.40137900  | -1.24372500 | 1.68429300  |
| C | 6.68282500  | -1.57627100 | 1.26677500  |
| C | 6.95683000  | -1.86484600 | -0.07875400 |
| C | 5.89919000  | -1.90257000 | -1.00798800 |
| C | 3.39553300  | -1.84588700 | -1.48496000 |
| C | 2.54021200  | -0.75884300 | -1.72126500 |
| C | 1.56235300  | -0.80048900 | -2.71165100 |
| C | 1.38969300  | -1.97099900 | -3.43840000 |
| C | 2.13428200  | -3.12242200 | -3.14973300 |

|   |            |             |             |
|---|------------|-------------|-------------|
| C | 3.12564900 | -3.07177700 | -2.15068700 |
| H | 5.19201200 | -0.97199300 | 2.71388300  |
| H | 7.49902600 | -1.57259900 | 1.98556400  |
| H | 0.96816500 | 0.08765000  | -2.89921300 |
| H | 0.64394400 | -2.00822000 | -4.22959800 |
| C | 1.87632500 | -4.37717100 | -3.97224400 |
| H | 2.36849200 | -4.25414700 | -4.94932100 |
| H | 0.80378100 | -4.45824700 | -4.18790000 |
| C | 3.81218300 | -4.36146300 | -1.71335000 |
| H | 4.82733300 | -4.17376300 | -1.36165200 |
| H | 3.27138600 | -4.73539100 | -0.82934000 |
| C | 3.80551900 | -5.46100300 | -2.78167800 |
| H | 4.47713600 | -5.18465100 | -3.60727200 |
| H | 4.19833400 | -6.39043700 | -2.35278100 |
| C | 2.38902400 | -5.66727900 | -3.32366700 |
| H | 1.72478800 | -5.96010400 | -2.49769100 |
| H | 2.36190500 | -6.48550600 | -4.05266100 |
| C | 6.19122200 | -2.10416600 | -2.49143500 |
| H | 5.93959000 | -3.12853500 | -2.79595200 |
| H | 5.53332300 | -1.45215600 | -3.07681100 |
| C | 8.40704500 | -2.08854400 | -0.48350200 |
| H | 8.88161500 | -2.76562300 | 0.23845600  |
| H | 8.94499800 | -1.13302500 | -0.39123500 |
| C | 8.57926100 | -2.61833200 | -1.91047200 |
| C | 7.65838400 | -1.84878900 | -2.85933600 |
| H | 7.82806600 | -2.14461700 | -3.90108000 |
| H | 7.88084400 | -0.77384900 | -2.79559300 |
| H | 8.32664900 | -3.68739600 | -1.94876100 |
| H | 9.62823900 | -2.53070500 | -2.21554400 |
| O | 2.69585900 | 0.42860400  | -1.01965700 |
| O | 3.09861100 | -0.85666600 | 1.17827800  |
| P | 2.36201700 | 0.53617500  | 0.60879100  |
| N | 3.42669100 | 1.87596400  | 0.82173700  |
| C | 4.30621000 | 2.40820800  | -0.19435300 |
| C | 3.93427600 | 3.58926800  | -0.87428800 |
| C | 5.50467000 | 1.76674500  | -0.51373800 |
| C | 4.74383400 | 4.03351700  | -1.93742700 |
| C | 6.30637900 | 2.24208500  | -1.55052800 |
| H | 5.79770900 | 0.88635300  | 0.04408900  |
| C | 5.91604200 | 3.36863500  | -2.27886600 |
| H | 4.45228000 | 4.93145700  | -2.47667800 |
| H | 7.23006500 | 1.72508300  | -1.79477000 |
| H | 6.52966800 | 3.73389100  | -3.09725300 |
| C | 3.38144200 | 2.65174100  | 2.02589300  |
| C | 3.88698600 | 2.12009700  | 3.21739900  |
| C | 2.81726500 | 3.94970900  | 2.01246500  |
| C | 3.80778400 | 2.83716000  | 4.41053600  |
| H | 4.33877400 | 1.13452400  | 3.19446700  |
| C | 2.73746000 | 4.65055500  | 3.23244800  |
| C | 3.22429500 | 4.10746500  | 4.41792600  |
| H | 4.19780400 | 2.40707400  | 5.32844000  |
| H | 2.30304000 | 5.64771700  | 3.23484100  |
| H | 3.15876500 | 4.67481800  | 5.34179200  |
| C | 2.80574200 | 4.42130700  | -0.46707000 |
| H | 2.40219900 | 5.07155300  | -1.24160600 |
| C | 2.33756700 | 4.59320000  | 0.79164300  |
| H | 1.60743300 | 5.38771700  | 0.94650000  |

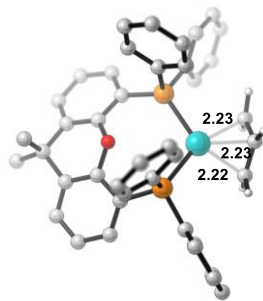

|    |             |             |             |
|----|-------------|-------------|-------------|
| Pd | 0.01342500  | -1.63929600 | -0.69450100 |
| P  | -1.99829400 | -0.39246000 | -0.11923200 |
| P  | 1.99968500  | -0.35145700 | -0.10930700 |
| O  | -0.04487200 | 1.76209100  | 0.22330700  |
| C  | -2.24765500 | 1.38533100  | -0.53948600 |
| C  | -3.44773900 | 1.89902400  | -1.05651400 |
| C  | -3.56097300 | 3.25719900  | -1.34928000 |
| C  | -2.48878200 | 4.12351800  | -1.12576900 |
| C  | -1.28487900 | 3.65586900  | -0.58929100 |
| C  | -1.20455700 | 2.28812700  | -0.30850400 |
| C  | -0.07565300 | 4.53230000  | -0.23694100 |
| C  | 1.18021700  | 3.69461900  | -0.51366900 |
| C  | 1.12495900  | 2.32186100  | -0.24588100 |
| C  | 2.20396100  | 1.45168500  | -0.43521400 |
| C  | 3.41663000  | 2.00839800  | -0.87514800 |
| C  | 3.50837500  | 3.37292300  | -1.14049800 |
| C  | 2.39834700  | 4.20383800  | -0.97334800 |
| C  | -0.12882400 | 4.85710600  | 1.28447500  |
| C  | -0.07207200 | 5.85245200  | -1.02581400 |
| C  | -2.29632900 | -0.46861300 | 1.69484100  |
| C  | -3.12830000 | 0.45904800  | 2.34258800  |
| C  | -3.36995000 | 0.34960500  | 3.71228400  |
| C  | -2.78700700 | -0.68405400 | 4.44925900  |
| C  | -1.95693200 | -1.60893700 | 3.81372100  |
| C  | -1.71006000 | -1.49943400 | 2.44456700  |
| C  | -3.49046200 | -1.16805000 | -0.88213700 |
| C  | -3.58151900 | -1.20638600 | -2.28548100 |
| C  | -4.67461200 | -1.80615300 | -2.90859100 |
| C  | -5.68700400 | -2.38836400 | -2.13924600 |
| C  | -5.60174700 | -2.35967300 | -0.74764900 |
| C  | -4.51152800 | -1.74950000 | -0.11851100 |
| C  | 3.49248700  | -1.03809700 | -0.95291200 |
| C  | 3.51815100  | -1.04046100 | -2.35911600 |
| C  | 4.61810400  | -1.55054600 | -3.04643200 |
| C  | 5.70401400  | -2.07609800 | -2.33894900 |
| C  | 5.68513100  | -2.08027300 | -0.94454700 |
| C  | 4.58726800  | -1.56005200 | -0.25106400 |
| C  | 2.34093200  | -0.54632500 | 1.68908200  |
| C  | 2.90690800  | 0.48112900  | 2.45828500  |
| C  | 3.18022100  | 0.27747300  | 3.81254100  |
| C  | 2.90063900  | -0.95220300 | 4.41056600  |
| C  | 2.33960700  | -1.98219700 | 3.65164800  |
| C  | 2.05427500  | -1.77762300 | 2.30210000  |
| H  | -4.28642800 | 1.23814000  | -1.24159100 |
| H  | -4.49050500 | 3.64372900  | -1.75581600 |
| H  | -2.60204900 | 5.17467600  | -1.36725900 |
| H  | 4.28228500  | 1.37363200  | -1.02443900 |
| H  | 4.44843900  | 3.79168200  | -1.48626500 |
| H  | 2.49278700  | 5.26024700  | -1.19941500 |
| H  | -1.03545500 | 5.42603100  | 1.51780700  |
| H  | 0.74075800  | 5.45748300  | 1.57350700  |
| H  | -0.13195900 | 3.94547800  | 1.88990900  |
| H  | -0.03498800 | 5.68303600  | -2.10706400 |

CP16

|   |             |             |             |
|---|-------------|-------------|-------------|
| H | 0.78479200  | 6.47065300  | -0.74261700 |
| H | -0.96509200 | 6.44174800  | -0.79811400 |
| H | -3.58730000 | 1.26655900  | 1.78074600  |
| H | -4.01383000 | 1.07336600  | 4.20366100  |
| H | -2.97642600 | -0.76530600 | 5.51570500  |
| H | -1.49473000 | -2.40990700 | 4.38347800  |
| H | -1.04965700 | -2.21053700 | 1.95630100  |
| H | -2.80011400 | -0.75650200 | -2.89439400 |
| H | -4.73623900 | -1.82056400 | -3.99308100 |
| H | -6.53646200 | -2.86003800 | -2.62447000 |
| H | -6.38603500 | -2.80715100 | -0.14380300 |
| H | -4.46472800 | -1.72688300 | 0.96522800  |
| H | 2.67969300  | -0.63231400 | -2.91961300 |
| H | 4.62817600  | -1.53932300 | -4.13265600 |
| H | 6.55922100  | -2.47804500 | -2.87426400 |
| H | 6.52719200  | -2.48280200 | -0.38878400 |
| H | 4.59216500  | -1.56012000 | 0.83398500  |
| H | 3.13784900  | 1.43937600  | 2.00458700  |
| H | 3.61584900  | 1.08183500  | 4.39823500  |
| H | 3.11811500  | -1.10789600 | 5.46325000  |
| H | 2.12105900  | -2.94217900 | 4.11103800  |
| H | 1.60845800  | -2.57963200 | 1.71937200  |
| C | 1.24776800  | -3.34426300 | -1.41889100 |
| H | 1.31836000  | -3.04269200 | -2.46212700 |
| H | 2.19155700  | -3.57963600 | -0.93864200 |
| C | 0.04362000  | -3.85811300 | -0.90624200 |
| H | 0.05520200  | -4.40779800 | 0.03373400  |
| C | -1.17964900 | -3.37295600 | -1.40309700 |
| H | -1.27222800 | -3.07814200 | -2.44669500 |
| H | -2.10949200 | -3.62938300 | -0.90717400 |

### TS15

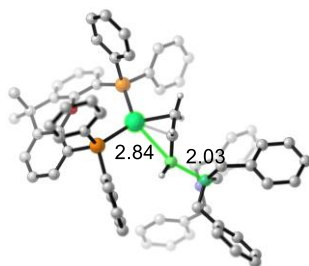

|    |             |             |             |
|----|-------------|-------------|-------------|
| Pd | -1.15036500 | 0.10915600  | 0.82124500  |
| P  | -2.79318900 | 1.85176100  | 0.72635300  |
| P  | -2.10013100 | -2.08206600 | 0.26566600  |
| O  | -4.33837800 | -0.35091100 | -0.53093100 |
| C  | -4.04296600 | 1.99918200  | -0.62921600 |
| C  | -4.39623800 | 3.22827700  | -1.20929000 |
| C  | -5.32382200 | 3.28105900  | -2.24799200 |
| C  | -5.92263100 | 2.11216000  | -2.72113200 |
| C  | -5.61684600 | 0.86941500  | -2.15812700 |
| C  | -4.67691400 | 0.85011200  | -1.12042100 |
| C  | -6.27858300 | -0.45795100 | -2.55120700 |
| C  | -5.21049000 | -1.55117300 | -2.42183100 |
| C  | -4.28668000 | -1.44114500 | -1.37526800 |
| C  | -3.28632600 | -2.38866600 | -1.12167800 |
| C  | -3.24960200 | -3.52257600 | -1.94885600 |
| C  | -4.15651400 | -3.66457400 | -2.99768000 |
| C  | -5.12013300 | -2.68311900 | -3.23731000 |
| C  | -7.41792400 | -0.76071600 | -1.53467400 |
| C  | -6.88102900 | -0.40453600 | -3.96523500 |
| C  | -3.81472400 | 1.87811000  | 2.26416100  |
| C  | -5.16700300 | 2.25157600  | 2.26788200  |
| C  | -5.89027800 | 2.27735400  | 3.46247800  |

|   |             |             |             |
|---|-------------|-------------|-------------|
| C | -5.27211400 | 1.94016700  | 4.66741200  |
| C | -3.92498300 | 1.57123400  | 4.67517800  |
| C | -3.20454100 | 1.53287900  | 3.48160800  |
| C | -2.00898000 | 3.52653600  | 0.67978400  |
| C | -1.07858700 | 3.79255900  | -0.34085800 |
| C | -0.44563400 | 5.03200300  | -0.42315800 |
| C | -0.72355900 | 6.02320000  | 0.52325400  |
| C | -1.64090800 | 5.76823200  | 1.54230800  |
| C | -2.28433400 | 4.52875400  | 1.62009000  |
| C | -0.76704700 | -3.31388000 | -0.11634700 |
| C | -0.04618600 | -3.18039200 | -1.31795200 |
| C | 1.00881300  | -4.04170200 | -1.61806200 |
| C | 1.37717200  | -5.04270000 | -0.71258300 |
| C | 0.67789700  | -5.17601000 | 0.48716900  |
| C | -0.39071700 | -4.32194800 | 0.78261100  |
| C | -2.96699000 | -2.81570700 | 1.72171500  |
| C | -3.83067900 | -3.91696600 | 1.60410000  |
| C | -4.44549100 | -4.45573000 | 2.73444100  |
| C | -4.20757100 | -3.90293600 | 3.99551300  |
| C | -3.35372000 | -2.80662200 | 4.12278400  |
| C | -2.73980600 | -2.26464900 | 2.99172900  |
| H | -3.93553500 | 4.14358600  | -0.85532700 |
| H | -5.58203100 | 4.23783300  | -2.69188600 |
| H | -6.64040500 | 2.17799700  | -3.53148200 |
| H | -2.49971500 | -4.28805800 | -1.78304900 |
| H | -4.11225100 | -4.54385800 | -3.63348300 |
| H | -5.81020600 | -2.81350900 | -4.06396100 |
| H | -8.18202600 | 0.02332700  | -1.57880500 |
| H | -7.89113100 | -1.72031700 | -1.77078200 |
| H | -7.03718800 | -0.81087500 | -0.51010400 |
| H | -6.12249700 | -0.18981900 | -4.72546100 |
| H | -7.36418300 | -1.35326900 | -4.21628300 |
| H | -7.65833500 | 0.36284100  | -4.02562600 |
| H | -5.65937700 | 2.52495300  | 1.34021100  |
| H | -6.93788900 | 2.56487600  | 3.44898800  |
| H | -5.83671500 | 1.96309700  | 5.59519100  |
| H | -3.43682100 | 1.30740000  | 5.60949500  |
| H | -2.16023800 | 1.23287800  | 3.49211500  |
| H | -0.85320400 | 3.02580000  | -1.07908400 |
| H | 0.26980600  | 5.22123100  | -1.21864100 |
| H | -0.22759400 | 6.98790700  | 0.46371600  |
| H | -1.86484900 | 6.53467700  | 2.27919100  |
| H | -3.00286900 | 4.34967400  | 2.41335300  |
| H | -0.32127000 | -2.40629400 | -2.03084400 |
| H | 1.54390200  | -3.93190900 | -2.55764200 |
| H | 2.19700800  | -5.71601500 | -0.94666500 |
| H | 0.94909300  | -5.95677900 | 1.19277800  |
| H | -0.93578800 | -4.45301500 | 1.71193500  |
| H | -4.02888100 | -4.35259000 | 0.62944900  |
| H | -5.11344700 | -5.30616900 | 2.62961000  |
| H | -4.69089600 | -4.32246400 | 4.87337600  |
| H | -3.17292800 | -2.36557300 | 5.09909500  |
| H | -2.08871100 | -1.40008900 | 3.08839300  |
| C | 1.56155100  | -0.70934400 | 0.66859900  |
| C | 0.88471900  | -0.02562300 | 1.72064500  |
| H | 0.80379600  | -0.54223500 | 2.67555000  |
| C | 0.39809400  | 1.31219300  | 1.62606300  |
| H | 0.75203600  | 1.97198800  | 0.83679600  |
| H | 0.12107700  | 1.83776000  | 2.53785800  |
| C | 4.05119800  | 0.52494900  | -0.01838600 |
| H | 5.14695500  | 0.53702700  | 0.00164100  |
| N | 3.58358500  | -0.64101700 | 0.82262200  |
| C | 3.99406700  | -1.98546400 | 0.29698900  |
| H | 3.80104500  | -1.95380200 | -0.77804600 |

|   |            |             |             |
|---|------------|-------------|-------------|
| C | 3.86694800 | -0.42737400 | 2.28563000  |
| H | 3.00968800 | 0.13675800  | 2.66610800  |
| H | 3.83823600 | -1.41576900 | 2.75208000  |
| H | 3.72174100 | 1.41548800  | 0.51632600  |
| N | 3.52567900 | 0.53318500  | -1.36944200 |
| C | 4.48970200 | 0.14893100  | -2.41391500 |
| H | 5.06515600 | -0.69985100 | -2.03274900 |
| H | 5.22037000 | 0.95101200  | -2.60730500 |
| C | 2.73727400 | 1.74397700  | -1.71833400 |
| H | 2.26464200 | 1.53802600  | -2.68325100 |
| H | 1.93085200 | 1.83081600  | -0.98361600 |
| C | 3.84738600 | -0.27074300 | -3.72561700 |
| C | 2.66535500 | -1.02398700 | -3.75852100 |
| C | 4.47805600 | 0.04129400  | -4.93648000 |
| C | 2.12902400 | -1.45252400 | -4.97370400 |
| H | 2.16206600 | -1.26527900 | -2.82633500 |
| C | 3.94794400 | -0.39372500 | -6.15334100 |
| H | 5.39607300 | 0.62509600  | -4.92766500 |
| C | 2.76986200 | -1.14112100 | -6.17552800 |
| H | 1.20812700 | -2.03025100 | -4.98456100 |
| H | 4.45279900 | -0.14294500 | -7.08205300 |
| H | 2.35185600 | -1.47524600 | -7.12081700 |
| C | 3.49641200 | 3.06026200  | -1.79077000 |
| C | 4.14284900 | 3.45308400  | -2.97319000 |
| C | 3.55688500 | 3.91831400  | -0.68232400 |
| C | 4.85305300 | 4.65313300  | -3.03601700 |
| H | 4.07131400 | 2.82343500  | -3.85673400 |
| C | 4.26507000 | 5.12026600  | -0.74167100 |
| C | 4.92109000 | 5.48721500  | -1.91803200 |
| H | 5.34435200 | 4.94184100  | -3.96115300 |
| H | 5.47037900 | 6.42312300  | -1.96768800 |
| H | 3.28333700 | -2.70495300 | 0.71246000  |
| C | 5.12627900 | 0.31879000  | 2.70683900  |
| C | 5.07027300 | 1.70913500  | 2.89542800  |
| C | 6.32257500 | -0.34577700 | 3.01212400  |
| C | 6.18416400 | 2.42227800  | 3.33827700  |
| H | 4.13823200 | 2.23993800  | 2.71180000  |
| C | 7.43681300 | 0.36438900  | 3.46219500  |
| H | 6.38409100 | -1.42369700 | 2.91196100  |
| C | 7.37488700 | 1.74998400  | 3.61890700  |
| H | 6.11744400 | 3.49768600  | 3.47694300  |
| H | 8.35278200 | -0.17018800 | 3.69759200  |
| H | 8.24300500 | 2.29999700  | 3.97092300  |
| C | 5.38721400 | -2.50813400 | 0.60424700  |
| C | 6.55416700 | -2.02176000 | -0.00494900 |
| C | 5.50965600 | -3.57486300 | 1.50851100  |
| C | 7.80096900 | -2.56995400 | 0.29670700  |
| H | 6.50551300 | -1.20715500 | -0.71943000 |
| C | 6.75479200 | -4.12902900 | 1.81144500  |
| H | 4.61643400 | -3.98368300 | 1.97608600  |
| C | 7.90691100 | -3.62328100 | 1.20773700  |
| H | 8.69094500 | -2.17590300 | -0.18553600 |
| H | 6.82207300 | -4.95611100 | 2.51252500  |
| H | 8.87827700 | -4.05168700 | 1.43717100  |
| H | 3.02630300 | 3.65711900  | 0.23136000  |
| H | 4.29644200 | 5.77325200  | 0.12634700  |
| H | 1.56862500 | -0.28973900 | -0.32944900 |
| H | 1.53845600 | -1.79146200 | 0.69525800  |

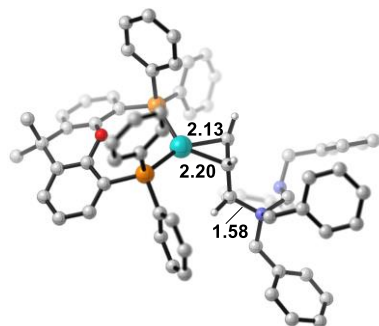

|    |             |             |             |
|----|-------------|-------------|-------------|
| Pd | 1.14203700  | 0.02722100  | 0.45666200  |
| P  | 2.68414400  | 1.87363600  | 0.63956100  |
| P  | 2.29089900  | -2.06041400 | -0.01096500 |
| O  | 4.52050300  | -0.17361800 | -0.44652200 |
| C  | 4.08571700  | 2.15439700  | -0.53988900 |
| C  | 4.42511400  | 3.41588000  | -1.05317400 |
| C  | 5.46859500  | 3.55366100  | -1.96741700 |
| C  | 6.20302400  | 2.43891900  | -2.37546100 |
| C  | 5.91451400  | 1.16606200  | -1.87313300 |
| C  | 4.85210200  | 1.06131600  | -0.96744700 |
| C  | 6.71655500  | -0.10385700 | -2.18777000 |
| C  | 5.72474000  | -1.27416800 | -2.20887300 |
| C  | 4.65932700  | -1.24794200 | -1.29954500 |
| C  | 3.70259700  | -2.26854900 | -1.19780600 |
| C  | 3.87122200  | -3.38948800 | -2.02702100 |
| C  | 4.92551600  | -3.45074100 | -2.93642200 |
| C  | 5.83547700  | -2.39684500 | -3.03412800 |
| C  | 7.73360100  | -0.34110400 | -1.03351100 |
| C  | 7.49190400  | 0.01737700  | -3.51076200 |
| C  | 3.51827100  | 1.91606000  | 2.29059600  |
| C  | 4.82849600  | 2.38250100  | 2.47370600  |
| C  | 5.40176300  | 2.40346000  | 3.74732200  |
| C  | 4.67234600  | 1.96872900  | 4.85485000  |
| C  | 3.36527800  | 1.50655400  | 4.68461500  |
| C  | 2.79645400  | 1.47325300  | 3.41155500  |
| C  | 1.81654900  | 3.50844900  | 0.55551700  |
| C  | 0.94843800  | 3.73599400  | -0.52672900 |
| C  | 0.25413900  | 4.93924400  | -0.64668400 |
| C  | 0.40599300  | 5.93317100  | 0.32502500  |
| C  | 1.26003900  | 5.71681300  | 1.40641700  |
| C  | 1.96528400  | 4.51448700  | 1.52040700  |
| C  | 1.12710400  | -3.36854800 | -0.63499000 |
| C  | 0.60570100  | -3.24194200 | -1.93677900 |
| C  | -0.30016200 | -4.17677700 | -2.44108400 |
| C  | -0.72565300 | -5.24420100 | -1.64175300 |
| C  | -0.23622200 | -5.36518800 | -0.34016400 |
| C  | 0.68699600  | -4.43925400 | 0.15752600  |
| C  | 2.95933700  | -2.80244200 | 1.54642000  |
| C  | 3.90969200  | -3.83617400 | 1.54659700  |
| C  | 4.36937500  | -4.37381400 | 2.74922800  |
| C  | 3.88695900  | -3.88763900 | 3.96706800  |
| C  | 2.94515100  | -2.85787100 | 3.97847700  |
| C  | 2.48742400  | -2.31656300 | 2.77537500  |
| H  | 3.86373500  | 4.29068200  | -0.74421000 |
| H  | 5.71432200  | 4.53537000  | -2.36155600 |
| H  | 7.01268500  | 2.57134700  | -3.08488400 |
| H  | 3.16572400  | -4.21124400 | -1.97468400 |
| H  | 5.03781000  | -4.32220400 | -3.57477600 |
| H  | 6.64298000  | -2.46144400 | -3.75502700 |
| H  | 8.43653500  | 0.49713200  | -0.97128100 |
| H  | 8.30312300  | -1.25983600 | -1.21333200 |
| H  | 7.22759700  | -0.43623700 | -0.06794600 |

CP17

|   |             |             |             |
|---|-------------|-------------|-------------|
| H | 6.82349500  | 0.18190800  | -4.36262900 |
| H | 8.07936400  | -0.88573100 | -3.70112200 |
| H | 8.20552500  | 0.84534200  | -3.46638500 |
| H | 5.40438700  | 2.73235700  | 1.62293300  |
| H | 6.41940400  | 2.76331400  | 3.87215300  |
| H | 5.12004600  | 1.98784800  | 5.84457200  |
| H | 2.79152800  | 1.16548300  | 5.54233200  |
| H | 1.78480200  | 1.09832600  | 3.28074700  |
| H | 0.81792800  | 2.96217300  | -1.28001400 |
| H | -0.41082300 | 5.09594900  | -1.49205300 |
| H | -0.13893000 | 6.86912900  | 0.23835000  |
| H | 1.38518800  | 6.48532800  | 2.16443500  |
| H | 2.63301900  | 4.36550400  | 2.36285700  |
| H | 0.93214400  | -2.41960300 | -2.56952800 |
| H | -0.65947700 | -4.08178100 | -3.46294000 |
| H | -1.41513100 | -5.98488600 | -2.03863300 |
| H | -0.55271400 | -6.19510100 | 0.28617300  |
| H | 1.07928600  | -4.56469300 | 1.16158200  |
| H | 4.29790600  | -4.21835300 | 0.60744100  |
| H | 5.10779300  | -5.17078400 | 2.73495900  |
| H | 4.25000100  | -4.30544300 | 4.90199000  |
| H | 2.57592400  | -2.46635300 | 4.92247400  |
| H | 1.77203000  | -1.49826300 | 2.78055000  |
| C | -1.65384000 | -0.84265800 | -0.41248200 |
| C | -0.98325300 | -0.37878400 | 0.84207000  |
| H | -1.01512100 | -1.05904800 | 1.69230600  |
| C | -0.65615700 | 0.97848900  | 1.08019600  |
| H | -0.93263400 | 1.74388800  | 0.36100500  |
| H | -0.54231900 | 1.34263400  | 2.10022300  |
| C | -4.06595500 | -0.03104900 | 0.14564400  |
| H | -5.09194800 | -0.39708200 | 0.04665000  |
| N | -3.18376500 | -1.23081600 | -0.32103200 |
| C | -3.55221600 | -1.69683400 | -1.74370900 |
| H | -3.52015600 | -0.79887500 | -2.36058600 |
| C | -3.30462200 | -2.42681300 | 0.67324300  |
| H | -2.33531800 | -2.49143400 | 1.16166700  |
| H | -3.41792600 | -3.31506600 | 0.05530000  |
| H | -3.84185300 | 0.05628200  | 1.20356000  |
| N | -3.80033300 | 1.22002300  | -0.49869800 |
| C | -4.63679500 | 1.56646800  | -1.66308600 |
| H | -4.80714200 | 0.65924500  | -2.24715200 |
| H | -5.63103400 | 1.91699700  | -1.34483300 |
| C | -3.67308500 | 2.36208100  | 0.45476200  |
| H | -3.17785200 | 3.17180400  | -0.08863200 |
| H | -2.98928900 | 2.04442300  | 1.24421600  |
| C | -4.01019900 | 2.60682300  | -2.57806400 |
| C | -2.64797000 | 2.57336100  | -2.90526100 |
| C | -4.81731000 | 3.58976700  | -3.16462400 |
| C | -2.10703700 | 3.49971400  | -3.79849300 |
| H | -2.00577200 | 1.82569200  | -2.44857000 |
| C | -4.27999500 | 4.51604400  | -4.06126600 |
| H | -5.87599600 | 3.63074300  | -2.91847100 |
| C | -2.92206900 | 4.47424200  | -4.38027200 |
| H | -1.04936800 | 3.45690500  | -4.04551100 |
| H | -4.92206000 | 5.27120400  | -4.50589800 |
| H | -2.50132000 | 5.19443200  | -5.07613600 |
| C | -4.97195800 | 2.87548900  | 1.05936900  |
| C | -5.60541500 | 4.00522800  | 0.52155300  |
| C | -5.55765400 | 2.25021800  | 2.17112800  |
| C | -6.79781900 | 4.48790300  | 1.06482000  |
| H | -5.15377400 | 4.51691600  | -0.32496800 |
| C | -6.75042500 | 2.72799900  | 2.71567500  |
| C | -7.37577700 | 3.84736500  | 2.16174000  |
| H | -7.26982500 | 5.36770900  | 0.63610200  |

|   |             |             |             |
|---|-------------|-------------|-------------|
| H | -8.30061700 | 4.22356700  | 2.58985700  |
| H | -2.71583800 | -2.32773500 | -2.05114700 |
| C | -4.38744500 | -2.38127100 | 1.72985300  |
| C | -4.10158100 | -1.83911000 | 2.99331200  |
| C | -5.65053500 | -2.94935600 | 1.50911700  |
| C | -5.06202400 | -1.84057800 | 4.00512500  |
| H | -3.11559000 | -1.42329400 | 3.18978100  |
| C | -6.61100400 | -2.95300800 | 2.52198700  |
| H | -5.88199400 | -3.40060200 | 0.54965100  |
| C | -6.32203100 | -2.39512400 | 3.76878700  |
| H | -4.82221600 | -1.42279700 | 4.97867000  |
| H | -7.58360400 | -3.40017400 | 2.33809800  |
| H | -7.06994300 | -2.40367900 | 4.55636800  |
| C | -4.83493500 | -2.47837200 | -1.92793300 |
| C | -6.10139900 | -1.87777200 | -2.01320900 |
| C | -4.74865400 | -3.87153700 | -2.09238800 |
| C | -7.24481400 | -2.64967800 | -2.22285600 |
| H | -6.21131300 | -0.80249700 | -1.92698400 |
| C | -5.89024100 | -4.64542800 | -2.30380500 |
| H | -3.77371000 | -4.35337100 | -2.06806100 |
| C | -7.14443100 | -4.03533600 | -2.36303000 |
| H | -8.21436100 | -2.16445100 | -2.28609600 |
| H | -5.79806600 | -5.72006400 | -2.43098700 |
| H | -8.03553500 | -4.63289600 | -2.53120900 |
| H | -5.07413000 | 1.39199000  | 2.63322300  |
| H | -7.18473100 | 2.23406500  | 3.58061600  |
| H | -1.61191800 | -0.07443200 | -1.18389300 |
| H | -1.20828500 | -1.76242200 | -0.79418300 |

### TS16

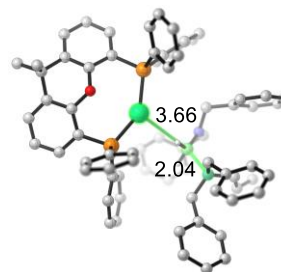

|    |             |             |             |
|----|-------------|-------------|-------------|
| Pd | -1.23484900 | 0.01508900  | 0.20554300  |
| P  | -2.51731600 | 1.90044700  | 0.57877900  |
| P  | -1.30401900 | -2.28047500 | 0.03563200  |
| O  | -3.97254300 | -0.80449900 | 0.37057400  |
| N  | 1.97494100  | 1.94316200  | -1.64777100 |
| C  | -4.26673300 | 1.56033700  | 0.05636200  |
| C  | -5.12456400 | 2.60870100  | -0.31821100 |
| C  | -6.43174400 | 2.36251300  | -0.72784800 |
| C  | -6.91634600 | 1.05536700  | -0.76342700 |
| C  | -6.10805400 | -0.02032400 | -0.38673400 |
| C  | -4.78968300 | 0.25248200  | 0.00954900  |
| C  | -6.58534200 | -1.47540300 | -0.32134600 |
| C  | -5.40947900 | -2.35653800 | -0.75879200 |
| C  | -4.12510200 | -1.98667500 | -0.33247700 |
| C  | -2.98375000 | -2.77405300 | -0.58655300 |
| C  | -3.16927200 | -3.95301500 | -1.32753200 |
| C  | -4.42942000 | -4.32546600 | -1.78896200 |
| C  | -5.54022900 | -3.53290900 | -1.50192400 |
| C  | -6.93064900 | -1.81471700 | 1.15869600  |
| C  | -7.83918300 | -1.71320200 | -1.17935400 |
| C  | -2.67425100 | 2.38138800  | 2.35775900  |
| C  | -3.73817700 | 3.14893500  | 2.85926400  |
| C  | -3.79222300 | 3.48394300  | 4.21264900  |
| C  | -2.78698200 | 3.05621200  | 5.08408900  |



|   |             |             |             |   |             |             |             |
|---|-------------|-------------|-------------|---|-------------|-------------|-------------|
| C | -1.72874300 | 2.28691700  | 4.59855700  | H | -0.70781400 | -4.96078100 | 5.08419800  |
| C | -1.67561000 | 1.94897000  | 3.24453800  | H | 0.49141200  | -2.83194300 | 4.61330400  |
| C | -2.16152000 | 3.49707300  | -0.29253000 | H | 0.17092500  | -1.68619800 | 2.43515700  |
| C | -2.17488200 | 3.50728600  | -1.70039800 | H | 2.18666700  | -0.03495000 | -2.11745000 |
| C | -1.80916200 | 4.65056600  | -2.40979000 | H | 1.35108700  | 0.33998900  | -0.51309200 |
| C | -1.40330500 | 5.80263700  | -1.72583800 | H | 3.47255300  | 2.57480200  | -3.01370600 |
| C | -1.37751800 | 5.80055200  | -0.33134000 | H | 1.89864200  | 3.36086300  | -3.15162500 |
| C | -1.75745900 | 4.65813200  | 0.38167100  | H | -0.11200500 | 1.50065000  | -3.68633200 |
| C | -0.17760000 | -3.21436800 | -1.10293800 | H | -0.73108500 | 0.02972200  | -5.57213400 |
| C | 0.12299600  | -2.61422300 | -2.33922400 | H | 1.02455600  | -0.87975200 | -7.08136000 |
| C | 0.97196800  | -3.24082100 | -3.25193500 | H | 3.41167600  | -0.30316100 | -6.68729600 |
| C | 1.54898200  | -4.47487700 | -2.93690000 | H | 4.03387900  | 1.17759300  | -4.79899600 |
| C | 1.26610800  | -5.07635200 | -1.70949500 | H | 0.74223200  | 2.42209500  | -0.04182500 |
| C | 0.40743500  | -4.45294400 | -0.79755100 | H | 0.76590900  | 3.60828600  | -1.33478200 |
| C | -1.16141500 | -3.18270500 | 1.64400400  | H | 1.66890100  | 3.13818500  | 1.96744100  |
| C | -1.84161600 | -4.37810200 | 1.92549800  | H | 3.24660700  | 4.51795500  | 3.27966300  |
| C | -1.67616300 | -5.01394100 | 3.15789100  | H | 4.89049300  | 5.98186200  | 2.11678700  |
| C | -0.83042800 | -4.46610000 | 4.12466800  | H | 4.91335100  | 6.07348800  | -0.36805300 |
| C | -0.15505100 | -3.27293900 | 3.85913300  | H | 3.32736000  | 4.71693100  | -1.67724100 |
| C | -0.32575800 | -2.63374000 | 2.63044900  | C | 4.84003100  | 0.86147600  | -0.43187700 |
| C | 2.03509400  | 0.65955600  | -1.30003000 | C | 5.47750900  | 0.90759000  | -1.79490700 |
| C | 2.39381900  | 2.39664700  | -3.00028000 | H | 5.69134700  | -0.03607400 | -2.29185800 |
| C | 2.00908900  | 1.44650100  | -4.11671300 | C | 5.91917800  | 2.03922200  | -2.35066100 |
| C | 0.66378200  | 1.11229800  | -4.34293600 | H | 5.76568500  | 3.00794600  | -1.87954800 |
| C | 0.31349100  | 0.27487400  | -5.40128700 | H | 6.47721300  | 2.03338600  | -3.28278800 |
| C | 1.30110900  | -0.23695100 | -6.25044900 | N | 3.65255400  | -0.02350500 | -0.26344700 |
| C | 2.63964100  | 0.08831000  | -6.03097500 | C | 3.14497100  | 0.02697800  | 1.15995600  |
| C | 2.99042900  | 0.92351800  | -4.96625100 | H | 2.32151900  | -0.69095700 | 1.20975800  |
| C | 1.40451700  | 2.95729500  | -0.72871600 | C | 3.78765300  | -1.40753600 | -0.82399300 |
| C | 2.40920000  | 3.78997000  | 0.04980800  | H | 2.78298500  | -1.84005700 | -0.78309800 |
| C | 2.39422700  | 3.76296100  | 1.45074100  | H | 4.01946300  | -1.27878200 | -1.88578200 |
| C | 3.28145200  | 4.54717000  | 2.19424800  | H | 2.71301300  | 1.02576100  | 1.26848400  |
| C | 4.20078000  | 5.36988800  | 1.54279600  | C | 4.76032600  | -2.39444900 | -0.19825000 |
| C | 4.21620400  | 5.41742900  | 0.14582500  | C | 6.15123300  | -2.20503100 | -0.19156300 |
| C | 3.32276000  | 4.64091200  | -0.59330200 | C | 4.25072100  | -3.59792400 | 0.31026800  |
| H | -4.75329900 | 3.62824000  | -0.31200100 | C | 6.99992200  | -3.17503800 | 0.34237800  |
| H | -7.07380600 | 3.18826800  | -1.01985300 | H | 6.59117300  | -1.30549500 | -0.60935800 |
| H | -7.93738800 | 0.87941200  | -1.08298500 | C | 5.09884100  | -4.57450100 | 0.83467000  |
| H | -2.31286800 | -4.57821200 | -1.55755300 | H | 3.17901200  | -3.77845200 | 0.28217100  |
| H | -4.54757500 | -5.23676500 | -2.36776500 | C | 6.47740600  | -4.36171300 | 0.86032800  |
| H | -6.51647500 | -3.84231300 | -1.85821600 | H | 8.07297500  | -3.00595800 | 0.34404000  |
| H | -7.74870100 | -1.17652900 | 1.51117000  | H | 4.68130400  | -5.50048500 | 1.22033100  |
| H | -7.24521300 | -2.86098000 | 1.24296900  | H | 7.14127800  | -5.11784200 | 1.26944500  |
| H | -6.07032800 | -1.66154400 | 1.81691800  | C | 4.10571500  | -0.20317000 | 2.31427400  |
| H | -7.66239600 | -1.48836800 | -2.23665100 | C | 4.16334000  | -1.44105600 | 2.96928300  |
| H | -8.17220800 | -2.75200300 | -1.09728300 | C | 4.87793300  | 0.85619200  | 2.81834200  |
| H | -8.67048300 | -1.09503300 | -0.82818000 | C | 4.99745300  | -1.62844600 | 4.07158500  |
| H | -4.53292200 | 3.47875100  | 2.19713700  | H | 3.55369200  | -2.26614200 | 2.61529600  |
| H | -4.62268100 | 4.07558200  | 4.58801700  | C | 5.71812200  | 0.66973600  | 3.91669000  |
| H | -2.83485400 | 3.31498200  | 6.13823800  | H | 4.80627900  | 1.84111700  | 2.36412200  |
| H | -0.95179700 | 1.93925900  | 5.27426100  | C | 5.78423400  | -0.57608000 | 4.54316800  |
| H | -0.86901700 | 1.32557800  | 2.86518500  | H | 5.02935100  | -2.59649900 | 4.56331600  |
| H | -2.48401600 | 2.61663200  | -2.24245500 | H | 6.30983100  | 1.50076700  | 4.29029900  |
| H | -1.84519900 | 4.64578400  | -3.49628500 | H | 6.43389000  | -0.72176200 | 5.40150500  |
| H | -1.11872100 | 6.69433700  | -2.27749100 | H | 4.52589200  | 1.86814700  | -0.13950500 |
| H | -1.07097900 | 6.69179300  | 0.20955900  | H | 5.59576600  | 0.54116700  | 0.29657500  |
| H | -1.74449300 | 4.67871000  | 1.46681600  |   |             |             |             |
| H | -0.31557400 | -1.64919700 | -2.58385800 | 4 |             |             |             |
| H | 1.18471000  | -2.76214200 | -4.20428900 |   |             |             |             |
| H | 2.21397700  | -4.96406000 | -3.64320700 |   |             |             |             |
| H | 1.70814300  | -6.03737600 | -1.46013600 |   |             |             |             |
| H | 0.18903700  | -4.93789900 | 0.14905900  |   |             |             |             |
| H | -2.50951800 | -4.81092700 | 1.18702600  |   |             |             |             |
| H | -2.21299700 | -5.93602900 | 3.36348100  |   |             |             |             |

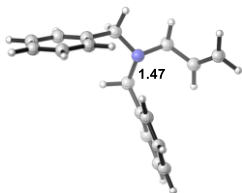

|   |             |             |             |
|---|-------------|-------------|-------------|
| C | -0.79398600 | -2.47376800 | -0.27988500 |
| C | -2.19279900 | -2.30898700 | 0.25690400  |
| H | -2.85562700 | -1.63630600 | -0.28204600 |
| C | -2.65701900 | -2.97492500 | 1.31485100  |
| H | -2.02878000 | -3.65924100 | 1.88242100  |
| H | -3.68246700 | -2.86194200 | 1.65673200  |
| N | 0.05083400  | -1.26473200 | -0.23368000 |
| C | 1.44951400  | -1.61849800 | -0.52248500 |
| H | 1.68102900  | -2.51332000 | 0.06915300  |
| C | -0.41906100 | -0.19889400 | -1.12786800 |
| H | -0.72357300 | -0.60772200 | -2.11135100 |
| H | 0.44045800  | 0.45334100  | -1.32404300 |
| H | 1.59583200  | -1.90421000 | -1.58283700 |
| C | -1.53601600 | 0.66837100  | -0.57207800 |
| C | -1.54466100 | 1.06045300  | 0.77283000  |
| C | -2.54212400 | 1.14942900  | -1.41876500 |
| C | -2.53616000 | 1.91319200  | 1.25737800  |
| H | -0.77510700 | 0.67626700  | 1.43447700  |
| C | -3.53462200 | 2.00648900  | -0.93720500 |
| H | -2.54954800 | 0.84997100  | -2.46515200 |
| C | -3.53465300 | 2.39112500  | 0.40431500  |
| H | -2.53113100 | 2.20489700  | 2.30471200  |
| H | -4.30899100 | 2.36782200  | -1.60919800 |
| H | -4.30777900 | 3.05429400  | 0.78352400  |
| C | 2.43425200  | -0.52435800 | -0.15641000 |
| C | 2.43530000  | 0.02308800  | 1.13500000  |
| C | 3.38078000  | -0.06725200 | -1.08006800 |
| C | 3.36147800  | 1.00197600  | 1.49146200  |
| H | 1.69860400  | -0.32387400 | 1.85427400  |
| C | 4.31297800  | 0.91192900  | -0.72557000 |
| H | 3.38850200  | -0.48150200 | -2.08614300 |
| C | 4.30502700  | 1.44940300  | 0.56152200  |
| H | 3.34988100  | 1.41644700  | 2.49632100  |
| H | 5.03994100  | 1.25580000  | -1.45680400 |
| H | 5.02683000  | 2.21271800  | 0.83986400  |
| H | -0.28852200 | -3.24702400 | 0.30970800  |
| H | -0.85476300 | -2.85593100 | -1.32141700 |

### TS17

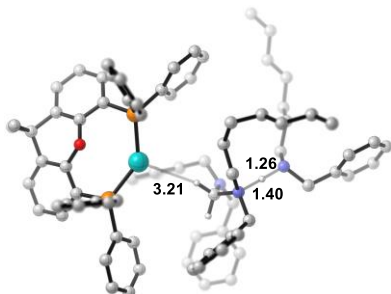

|   |             |             |             |
|---|-------------|-------------|-------------|
| N | 2.37243100  | -1.21969500 | -1.81529300 |
| C | 1.80913600  | -1.68197600 | -0.58235100 |
| C | 1.82069400  | -0.01542700 | -2.46098000 |
| C | 0.67710900  | -0.20864400 | -3.44558700 |
| C | 0.92671500  | -0.23732600 | -4.82449400 |
| C | -0.11142900 | -0.43760700 | -5.73810500 |
| C | -1.41985700 | -0.60203800 | -5.28057100 |

|   |             |             |             |
|---|-------------|-------------|-------------|
| C | -1.68551400 | -0.55360900 | -3.90880100 |
| C | -0.64560600 | -0.35578700 | -2.99863000 |
| C | 3.11198300  | -2.17913400 | -2.64404500 |
| C | 2.49366000  | -3.55427700 | -2.87715000 |
| C | 1.26431800  | -3.71608000 | -3.53434000 |
| C | 0.76326900  | -4.99248400 | -3.79426300 |
| C | 1.47236700  | -6.12900100 | -3.39220700 |
| C | 2.69154500  | -5.98103400 | -2.73152400 |
| C | 3.19480800  | -4.70141300 | -2.48120600 |
| H | 0.95127200  | -1.06490800 | -0.30886600 |
| H | 1.44815300  | -2.70911800 | -0.67241500 |
| H | 1.50439100  | 0.66066000  | -1.66071500 |
| H | 2.64398200  | 0.49029500  | -2.98494600 |
| H | 1.94214000  | -0.09524900 | -5.19022200 |
| H | 0.10158900  | -0.45801200 | -6.80339100 |
| H | -2.23017500 | -0.75290800 | -5.98841400 |
| H | -2.70392300 | -0.65614700 | -3.54349200 |
| H | -0.88017500 | -0.29476900 | -1.93272900 |
| H | 3.28086300  | -1.69523700 | -3.61203200 |
| H | 4.11410800  | -2.34268800 | -2.21299300 |
| H | 0.70648500  | -2.84409300 | -3.85866500 |
| H | -0.17887100 | -5.09959100 | -4.32540300 |
| H | 1.08046900  | -7.12046100 | -3.60109800 |
| H | 3.25485900  | -6.85582900 | -2.41884100 |
| H | 4.16073800  | -4.59450000 | -1.98984900 |
| C | 5.87375900  | 1.65369900  | 4.16185700  |
| H | 6.37560100  | 2.34522300  | 3.48382900  |
| C | 6.55545400  | 1.13820200  | 5.19726800  |
| H | 6.08901600  | 0.45722800  | 5.90571400  |
| H | 7.59382900  | 1.39517700  | 5.38252100  |
| C | 4.47220200  | 1.37001800  | 3.87670400  |
| H | 3.95369200  | 0.72289300  | 4.58648800  |
| C | 3.78923000  | 1.88019900  | 2.83341400  |
| H | 4.31431900  | 2.54910900  | 2.14720000  |
| C | 2.33915800  | 1.63269700  | 2.52135900  |
| H | 1.85243700  | 2.58807000  | 2.29370700  |
| H | 1.82653200  | 1.21630400  | 3.39846600  |
| C | 2.13155500  | 0.68859600  | 1.31010300  |
| H | 1.10922700  | 0.81430600  | 0.93618500  |
| H | 2.80389200  | 0.99234400  | 0.49722600  |
| C | 2.36339600  | -0.77498700 | 1.70866400  |
| H | 3.16054100  | -0.82938000 | 2.46165600  |
| H | 1.45690900  | -1.17364600 | 2.17621800  |
| N | 2.79401700  | -1.66853100 | 0.59076100  |
| H | 5.20141000  | 0.06418600  | 1.01331800  |
| C | 3.09041600  | -3.06026700 | 1.10489900  |
| H | 3.33075000  | -3.66527100 | 0.22579900  |
| H | 4.00081900  | -2.97467900 | 1.70800900  |
| C | 2.02271900  | -3.73956800 | 1.94058400  |
| C | 2.06423300  | -3.64168400 | 3.33995900  |
| C | 0.99747400  | -4.49480000 | 1.35252900  |
| C | 1.09345600  | -4.25497000 | 4.13172000  |
| H | 2.87085300  | -3.08783100 | 3.81592100  |
| C | 0.01979900  | -5.10396700 | 2.14120900  |
| H | 0.96326100  | -4.62609100 | 0.27446700  |
| C | 0.06330900  | -4.98188700 | 3.53143200  |
| H | 1.14629400  | -4.17199400 | 5.21371400  |
| H | -0.77268500 | -5.67331300 | 1.66587600  |
| H | -0.69471800 | -5.46147900 | 4.14408700  |
| C | 5.65887700  | 6.19562500  | -2.34646300 |
| H | 6.53095300  | 6.47699100  | -1.75596500 |
| C | 4.86728500  | 7.15458000  | -2.85106700 |
| H | 3.99351100  | 6.91450700  | -3.45318000 |
| H | 5.07143500  | 8.20824600  | -2.68872900 |

|    |             |             |             |
|----|-------------|-------------|-------------|
| C  | 5.43291700  | 4.76868900  | -2.53240200 |
| H  | 4.55957300  | 4.49117100  | -3.12582100 |
| C  | 6.21625700  | 3.79897400  | -2.03144000 |
| H  | 7.09444800  | 4.07637300  | -1.44585200 |
| C  | 5.96520900  | 2.32703200  | -2.20157600 |
| H  | 6.81435100  | 1.85646100  | -2.72031800 |
| H  | 5.08366500  | 2.17654000  | -2.83895000 |
| C  | 5.75741700  | 1.60589800  | -0.85296000 |
| H  | 6.67233300  | 1.67725100  | -0.25153400 |
| H  | 4.96163000  | 2.11774000  | -0.29574400 |
| C  | 5.37866600  | 0.13780400  | -1.05050900 |
| H  | 4.43135100  | 0.05205300  | -1.58740400 |
| H  | 6.14719100  | -0.37686300 | -1.63319200 |
| N  | 5.20130700  | -0.61252900 | 0.24345300  |
| H  | 4.05962000  | -1.13671500 | 0.29079800  |
| C  | 6.27292900  | -1.63413400 | 0.52980500  |
| H  | 6.01813800  | -2.07964200 | 1.49605900  |
| H  | 6.17106900  | -2.41158400 | -0.23281100 |
| C  | 7.68034800  | -1.08432200 | 0.55461900  |
| C  | 8.55845400  | -1.31821000 | -0.51165800 |
| C  | 8.12940800  | -0.34089800 | 1.65686000  |
| C  | 9.85798400  | -0.80727400 | -0.48701000 |
| H  | 8.23165600  | -1.91624400 | -1.35968800 |
| C  | 9.42589600  | 0.17271300  | 1.67999400  |
| H  | 7.47188800  | -0.16985400 | 2.50738900  |
| C  | 10.29190300 | -0.05804800 | 0.60734500  |
| H  | 10.53040800 | -1.00107400 | -1.31758900 |
| H  | 9.76517400  | 0.74200600  | 2.54064000  |
| H  | 11.30370100 | 0.33606800  | 0.63045300  |
| Pd | -1.91272300 | 0.16576100  | 0.45171000  |
| P  | -3.49931600 | -1.51921800 | 0.54027700  |
| P  | -1.90525300 | 2.47148300  | 0.57271500  |
| O  | -4.59244000 | 1.23575700  | -0.13832400 |
| C  | -4.89257100 | -1.09106500 | -0.61579900 |
| C  | -5.59284300 | -2.07467900 | -1.33248800 |
| C  | -6.60947100 | -1.73286300 | -2.22202800 |
| C  | -6.96668400 | -0.39694000 | -2.39772000 |
| C  | -6.31391600 | 0.61864500  | -1.69204000 |
| C  | -5.27281400 | 0.24996900  | -0.82801600 |
| C  | -6.71497600 | 2.09761100  | -1.74159500 |
| C  | -5.43196300 | 2.92745300  | -1.61915400 |
| C  | -4.42028100 | 2.45180200  | -0.77272000 |
| C  | -3.23223800 | 3.16822000  | -0.52664800 |
| C  | -3.09114400 | 4.41296600  | -1.16102800 |
| C  | -4.07595600 | 4.90278400  | -2.01578000 |
| C  | -5.23362700 | 4.16134000  | -2.24599000 |
| C  | -7.61478400 | 2.40151000  | -0.50779300 |
| C  | -7.50396800 | 2.44003500  | -3.01699000 |
| C  | -4.32503600 | -1.56117900 | 2.19622800  |
| C  | -5.71753700 | -1.58256300 | 2.36202300  |
| C  | -6.27851300 | -1.62540700 | 3.64130400  |
| C  | -5.45677300 | -1.65680100 | 4.76867100  |
| C  | -4.06819700 | -1.63989800 | 4.61369600  |
| C  | -3.50732200 | -1.58396700 | 3.33819400  |
| C  | -3.23743000 | -3.32054200 | 0.17787600  |
| C  | -2.30102500 | -3.66575200 | -0.80999200 |
| C  | -2.07329000 | -5.00221400 | -1.14198700 |
| C  | -2.76873900 | -6.01727700 | -0.47872200 |
| C  | -3.69120900 | -5.68706400 | 0.51657700  |
| C  | -3.92550000 | -4.34859800 | 0.84165800  |
| C  | -0.45610900 | 3.54921200  | 0.13570000  |
| C  | 0.16310700  | 3.34433900  | -1.11134500 |
| C  | 1.28513700  | 4.08482900  | -1.48167100 |
| C  | 1.82597900  | 5.03260000  | -0.60619400 |

|   |             |             |             |
|---|-------------|-------------|-------------|
| C | 1.22546100  | 5.23741000  | 0.63636300  |
| C | 0.09057400  | 4.50570000  | 1.00435700  |
| C | -2.39780500 | 3.07773600  | 2.25041500  |
| C | -3.10065500 | 4.27658300  | 2.45055800  |
| C | -3.43993800 | 4.69166600  | 3.73946800  |
| C | -3.08109300 | 3.91631000  | 4.84461800  |
| C | -2.38597200 | 2.72037700  | 4.65645200  |
| C | -2.05160600 | 2.30153700  | 3.36745100  |
| H | -5.33268100 | -3.11872100 | -1.19947900 |
| H | -7.13155000 | -2.51079700 | -2.77156400 |
| H | -7.76995600 | -0.15064800 | -3.08324600 |
| H | -2.19304700 | 4.99812500  | -0.99584400 |
| H | -3.94193300 | 5.86485400  | -2.50170100 |
| H | -5.99140900 | 4.55814800  | -2.91243000 |
| H | -8.53105300 | 1.80168900  | -0.54976800 |
| H | -7.89334300 | 3.46130900  | -0.49433000 |
| H | -7.09825800 | 2.17228000  | 0.42918600  |
| H | -6.91887000 | 2.25082500  | -3.92340000 |
| H | -7.80745700 | 3.49097900  | -3.01456000 |
| H | -8.42584400 | 1.85385300  | -3.07103800 |
| H | -6.36835700 | -1.56631200 | 1.49310400  |
| H | -7.35931700 | -1.63615900 | 3.75402700  |
| H | -5.89492300 | -1.69006000 | 5.76240300  |
| H | -3.42228400 | -1.65991100 | 5.48771600  |
| H | -2.42695900 | -1.54988900 | 3.22079300  |
| H | -1.74936000 | -2.88136400 | -1.32317100 |
| H | -1.34647500 | -5.24933100 | -1.91058600 |
| H | -2.59240700 | -7.05848500 | -0.73567800 |
| H | -4.23613200 | -6.47020700 | 1.03725100  |
| H | -4.65125200 | -4.10566900 | 1.61139600  |
| H | -0.24785500 | 2.61045700  | -1.80127700 |
| H | 1.73588000  | 3.92513800  | -2.45825500 |
| H | 2.70058700  | 5.60937200  | -0.89511600 |
| H | 1.63021100  | 5.97804100  | 1.32137900  |
| H | -0.37385200 | 4.69099200  | 1.96762000  |
| H | -3.39087100 | 4.88437100  | 1.59872400  |
| H | -3.98808800 | 5.61944000  | 3.87961300  |
| H | -3.35046900 | 4.23923200  | 5.84653200  |
| H | -2.11745900 | 2.10558400  | 5.51145200  |
| H | -1.53924500 | 1.35487100  | 3.21459200  |

### CP18

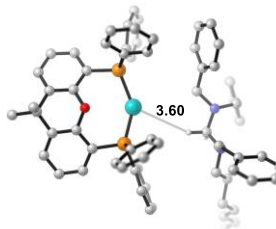

|    |             |             |             |
|----|-------------|-------------|-------------|
| Pd | 1.39236500  | -0.06193900 | -0.32292700 |
| P  | 3.11226200  | 1.46414300  | -0.39045200 |
| P  | 1.03873100  | -2.28804800 | 0.10134700  |
| O  | 3.98511700  | -1.47425100 | -0.16921100 |
| N  | -2.86975500 | 2.02134300  | 0.42601400  |
| C  | 4.65933700  | 0.65799100  | -1.04458300 |
| C  | 5.61876100  | 1.39110200  | -1.76171600 |
| C  | 6.75464700  | 0.78064700  | -2.28815800 |
| C  | 6.96745300  | -0.58358100 | -2.09577400 |
| C  | 6.05186800  | -1.35413200 | -1.37402300 |
| C  | 4.90598300  | -0.71891900 | -0.87126000 |
| C  | 6.24548200  | -2.83756700 | -1.03966500 |
| C  | 4.86406500  | -3.49899100 | -1.10002100 |

|   |             |             |             |   |             |             |             |
|---|-------------|-------------|-------------|---|-------------|-------------|-------------|
| C | 3.77220100  | -2.76809000 | -0.60731600 | H | 1.56485300  | 4.05512400  | -4.30839800 |
| C | 2.46826400  | -3.29885600 | -0.53662000 | H | 2.65449100  | 6.19089100  | -3.63840200 |
| C | 2.29049000  | -4.61284900 | -0.99915600 | H | 3.97428400  | 6.29456400  | -1.53269500 |
| C | 3.35392300  | -5.35283700 | -1.51148000 | H | 4.21040600  | 4.28567000  | -0.11249500 |
| C | 4.63162300  | -4.79776400 | -1.56109600 | H | -0.33449900 | -2.08204000 | -2.40543200 |
| C | 6.78263700  | -2.94901300 | 0.41731600  | H | -2.24113400 | -3.25819100 | -3.46334700 |
| C | 7.25392800  | -3.51634300 | -1.98147100 | H | -3.44476400 | -5.05051300 | -2.22035100 |
| C | 3.63829100  | 2.08931600  | 1.27067400  | H | -2.72157600 | -5.65107400 | 0.08163600  |
| C | 4.95190800  | 2.00448700  | 1.75425600  | H | -0.79436400 | -4.50808100 | 1.11930000  |
| C | 5.27152800  | 2.48443500  | 3.02753700  | H | 2.05916300  | -4.60053300 | 1.78264200  |
| C | 4.28715300  | 3.06533100  | 3.82745500  | H | 1.93082700  | -5.06194100 | 4.20505800  |
| C | 2.97639500  | 3.15999300  | 3.35179300  | H | 0.81340600  | -3.44690800 | 5.73046300  |
| C | 2.65180500  | 2.66722500  | 2.08886900  | H | -0.16150300 | -1.35008600 | 4.80790300  |
| C | 3.02866900  | 3.01769800  | -1.40186500 | H | -0.00462600 | -0.87419500 | 2.38037000  |
| C | 2.27610900  | 2.97444800  | -2.58723800 | H | -3.56096600 | 0.57560500  | -0.98771300 |
| C | 2.14927700  | 4.10643900  | -3.39332800 | H | -2.18301200 | 0.10727300  | 0.02087900  |
| C | 2.76004200  | 5.30570600  | -3.01657000 | H | -4.86626300 | 2.47437600  | 0.72119700  |
| C | 3.49996000  | 5.36378700  | -1.83373100 | H | -3.77203200 | 3.85768800  | 0.81423900  |
| C | 3.63566400  | 4.22754100  | -1.03200500 | H | -5.85774900 | 1.80308000  | -1.41408200 |
| C | -0.41122400 | -3.22709600 | -0.57890400 | H | -6.40068300 | 2.38451900  | -3.75630700 |
| C | -0.84567900 | -2.87875100 | -1.86948700 | H | -5.23031700 | 4.27484200  | -4.87566100 |
| C | -1.92411000 | -3.53568700 | -2.46138500 | H | -3.52425300 | 5.58055700  | -4.61960800 |
| C | -2.60178400 | -4.53928700 | -1.76269600 | H | -2.98445700 | 4.99144300  | -1.27798600 |
| C | -2.19403500 | -4.87785500 | -0.47112000 | H | -0.85079300 | 1.70136200  | 0.05505500  |
| C | -1.10413400 | -4.22963700 | 0.11663000  | H | -1.58818500 | 2.78275400  | -1.11786900 |
| C | 1.01106000  | -2.71403800 | 1.90470900  | H | -0.12816300 | 4.63716400  | -0.96215300 |
| C | 1.56476900  | -3.88865800 | 2.43699600  | H | 0.81002200  | 6.53490800  | 0.31397300  |
| C | 1.49307900  | -4.14972400 | 3.80759100  | H | 0.40302500  | 6.71769500  | 2.76535700  |
| C | 0.86539500  | -3.24338200 | 4.66408800  | H | -0.94496200 | 4.97021300  | 3.91832900  |
| C | 0.31598200  | -2.06818200 | 4.14632700  | H | -1.87345700 | 3.06281900  | 2.62658300  |
| C | 0.39573000  | -1.80264400 | 2.77854400  | C | -8.53010300 | -2.56737700 | -4.28836500 |
| C | -3.14812200 | 0.64532400  | 0.03019200  | H | -9.41013700 | -2.05849800 | -3.89300400 |
| C | -4.00426300 | 2.95072600  | 0.24599500  | C | -8.53736700 | -2.99335900 | -5.56048800 |
| C | -4.35584800 | 3.33014200  | -1.18622800 | H | -7.68119500 | -3.50536200 | -5.99467100 |
| C | -5.32826200 | 2.61701600  | -1.90241000 | H | -9.39601800 | -2.84524600 | -6.20839900 |
| C | -5.64118700 | 2.94991000  | -3.22205800 | C | -7.41530100 | -2.73246200 | -3.36595500 |
| C | -4.98709300 | 4.01172800  | -3.84946300 | H | -6.53213700 | -3.24149400 | -3.75607400 |
| C | -4.02761700 | 4.74196900  | -3.14468400 | C | -7.41612000 | -2.30499700 | -2.09184400 |
| C | -3.71917200 | 4.40534700  | -1.82540900 | H | -8.30413000 | -1.79376400 | -1.71342600 |
| C | -1.57905600 | 2.52184600  | -0.04494000 | C | -6.27772300 | -2.45099300 | -1.12360900 |
| C | -1.06477500 | 3.71514500  | 0.74602600  | H | -5.46755900 | -3.03210500 | -1.58331100 |
| C | -0.31042200 | 4.70903500  | 0.10768200  | H | -6.61651600 | -3.02538000 | -0.24676800 |
| C | 0.22159700  | 5.78041600  | 0.82924700  | C | -5.72906100 | -1.09439600 | -0.63538900 |
| C | -0.00311900 | 5.88079800  | 2.20319400  | H | -5.37656300 | -0.52554800 | -1.50358000 |
| C | -0.75829400 | 4.89815400  | 2.84942900  | H | -6.53766700 | -0.50814800 | -0.17898800 |
| C | -1.28047900 | 3.82336500  | 2.12736200  | C | -4.60905100 | -1.26650000 | 0.39741800  |
| H | 5.46405500  | 2.45248300  | -1.92259700 | H | -5.00998300 | -1.84144200 | 1.23900000  |
| H | 7.47603400  | 1.36948900  | -2.84774200 | H | -3.78984700 | -1.87352100 | -0.03282400 |
| H | 7.85886200  | -1.04437500 | -2.50734800 | N | -4.10042700 | 0.00214300  | 0.94170300  |
| H | 1.30042800  | -5.05508900 | -0.97270500 | C | -3.50793400 | -0.18215600 | 2.27191600  |
| H | 3.18648300  | -6.36428900 | -1.87096500 | H | -2.74478400 | -0.98446100 | 2.26618400  |
| H | 5.45068900  | -5.38794800 | -1.95758900 | H | -2.98188900 | 0.75048500  | 2.50334100  |
| H | 7.75708000  | -2.45385700 | 0.50040200  | C | -4.52261300 | -0.46843000 | 3.36275800  |
| H | 6.90210300  | -4.00196800 | 0.69783500  | C | -5.73308300 | 0.23623400  | 3.42912300  |
| H | 6.09869500  | -2.48072100 | 1.13106700  | C | -4.24424600 | -1.41432900 | 4.35756000  |
| H | 6.93180800  | -3.47102300 | -3.02737700 | C | -6.63637400 | 0.00488000  | 4.46649800  |
| H | 7.39268200  | -4.56651300 | -1.70737400 | H | -5.96153100 | 0.95989600  | 2.65239800  |
| H | 8.23720100  | -3.04284800 | -1.90169100 | C | -5.14406600 | -1.64429300 | 5.40113800  |
| H | 5.72976400  | 1.56385500  | 1.13866000  | H | -3.31250200 | -1.97516500 | 4.31353800  |
| H | 6.29336400  | 2.40535800  | 3.39019100  | C | -6.34458200 | -0.93517600 | 5.45874800  |
| H | 4.53797700  | 3.43972800  | 4.81660300  | H | -7.57067000 | 0.55999000  | 4.50184900  |
| H | 2.20060100  | 3.61303100  | 3.96278900  | H | -4.90952400 | -2.38320600 | 6.16340700  |
| H | 1.62631300  | 2.73391300  | 1.73595400  | H | -7.04892800 | -1.11517900 | 6.26681200  |
| H | 1.77867400  | 2.04830300  | -2.86655800 |   |             |             |             |

**TS18**

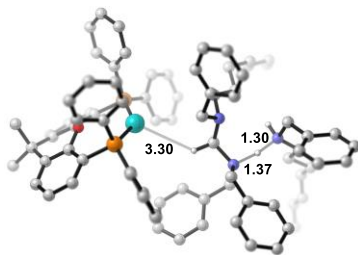

|    |             |             |             |
|----|-------------|-------------|-------------|
| Pd | -2.25374400 | 0.00496500  | 0.24941500  |
| P  | -3.16347300 | -2.09321200 | -0.08375300 |
| P  | -2.92391800 | 2.20424100  | 0.39042600  |
| O  | -5.02462200 | 0.27089200  | -0.68087300 |
| N  | 3.04891300  | -0.72225800 | -0.66331200 |
| C  | -4.55596300 | -1.99520800 | -1.31166600 |
| C  | -4.88456100 | -3.09103800 | -2.12682400 |
| C  | -5.89973900 | -3.00711400 | -3.07625300 |
| C  | -6.62394300 | -1.82434000 | -3.22179700 |
| C  | -6.35244900 | -0.71391000 | -2.41772800 |
| C  | -5.31273100 | -0.81865000 | -1.48113300 |
| C  | -7.16397200 | 0.58618700  | -2.44161600 |
| C  | -6.18902500 | 1.73897700  | -2.17779300 |
| C  | -5.16117700 | 1.52428500  | -1.24772400 |
| C  | -4.26523300 | 2.53818400  | -0.85436500 |
| C  | -4.42851000 | 3.80180300  | -1.44533900 |
| C  | -5.42573900 | 4.03435500  | -2.38979700 |
| C  | -6.29756900 | 3.00850800  | -2.75258400 |
| C  | -8.19646500 | 0.54169500  | -1.27667400 |
| C  | -7.92950900 | 0.76701500  | -3.76331400 |
| C  | -3.97417200 | -2.79101100 | 1.42615600  |
| C  | -5.27643600 | -3.31200300 | 1.43404400  |
| C  | -5.82931000 | -3.81984200 | 2.61270000  |
| C  | -5.08648100 | -3.82548900 | 3.79397500  |
| C  | -3.78602000 | -3.31426800 | 3.79590600  |
| C  | -3.23966800 | -2.79230500 | 2.62417300  |
| C  | -2.19217000 | -3.53303500 | -0.74010700 |
| C  | -1.34909900 | -3.30390800 | -1.84216200 |
| C  | -0.59523300 | -4.34235300 | -2.39035000 |
| C  | -0.64776800 | -5.62217600 | -1.82778900 |
| C  | -1.46489400 | -5.85513700 | -0.72100700 |
| C  | -2.23794200 | -4.82070600 | -0.18489800 |
| C  | -1.78392700 | 3.64064000  | 0.09498300  |
| C  | -0.98845300 | 3.61327400  | -1.06593300 |
| C  | -0.09198500 | 4.64307600  | -1.34550400 |
| C  | 0.04274300  | 5.71528900  | -0.45651300 |
| C  | -0.72675000 | 5.74553900  | 0.70706000  |
| C  | -1.63662800 | 4.71766200  | 0.98032300  |
| C  | -3.74784300 | 2.62331500  | 1.99435900  |
| C  | -4.74393700 | 3.60667800  | 2.10882500  |
| C  | -5.32703000 | 3.88443100  | 3.34626500  |
| C  | -4.92534600 | 3.18328400  | 4.48564300  |
| C  | -3.94149900 | 2.19842200  | 4.38228600  |
| C  | -3.36088500 | 1.91762900  | 3.14417800  |
| C  | 1.86872500  | -0.05599000 | 0.02141800  |
| C  | 3.17263100  | -0.18047200 | -2.07136500 |
| C  | 2.03535000  | -0.44925700 | -3.04100000 |
| C  | 2.13725700  | -1.49067600 | -3.97525700 |
| C  | 1.12327600  | -1.71567700 | -4.90844900 |
| C  | -0.00957700 | -0.89967900 | -4.92375500 |
| C  | -0.11582600 | 0.15141800  | -4.00986400 |
| C  | 0.90254000  | 0.37846800  | -3.08311100 |
| C  | 2.89872900  | -2.21382000 | -0.61724100 |
| C  | 3.89743100  | -3.04270000 | -1.40474500 |

|   |             |             |             |
|---|-------------|-------------|-------------|
| C | 5.26240800  | -2.74167800 | -1.49577900 |
| C | 6.13488900  | -3.57644500 | -2.19715700 |
| C | 5.65844700  | -4.73852500 | -2.80502800 |
| C | 4.30290800  | -5.05887100 | -2.70738600 |
| C | 3.43091000  | -4.21489200 | -2.01876400 |
| H | -4.32819900 | -4.01629600 | -2.02328700 |
| H | -6.13025400 | -3.86523300 | -3.70088500 |
| H | -7.41464100 | -1.77663700 | -3.96253800 |
| H | -3.75718100 | 4.60879300  | -1.17192700 |
| H | -5.52773800 | 5.01784300  | -2.83931100 |
| H | -7.07428000 | 3.20811300  | -3.48260400 |
| H | -8.89085800 | -0.29425900 | -1.41806000 |
| H | -8.77458500 | 1.47220600  | -1.24728400 |
| H | -7.70218500 | 0.41598100  | -0.30873300 |
| H | -7.25506100 | 0.80757700  | -4.62541100 |
| H | -8.52213500 | 1.68629200  | -3.74395900 |
| H | -8.63755500 | -0.05268300 | -3.91623300 |
| H | -5.86350200 | -3.32132400 | 0.52127800  |
| H | -6.84213100 | -4.21359000 | 2.60416600  |
| H | -5.51857300 | -4.22276900 | 4.70833500  |
| H | -3.19916500 | -3.31321300 | 4.71071200  |
| H | -2.23479800 | -2.37933400 | 2.63748800  |
| H | -1.29408600 | -2.31108500 | -2.28315000 |
| H | 0.02821600  | -4.14899600 | -3.25943400 |
| H | -0.06254700 | -6.43277200 | -2.25424100 |
| H | -1.51480700 | -6.84670100 | -0.27889500 |
| H | -2.88386200 | -5.02231700 | 0.66368200  |
| H | -1.09027000 | 2.78231400  | -1.76083200 |
| H | 0.49680300  | 4.61529800  | -2.25912700 |
| H | 0.73461600  | 6.52398200  | -0.67652200 |
| H | -0.63359300 | 6.57692100  | 1.40090700  |
| H | -2.23956400 | 4.76537100  | 1.88126500  |
| H | -5.07332700 | 4.15212700  | 1.22950100  |
| H | -6.09910000 | 4.64567200  | 3.41884400  |
| H | -5.38414600 | 3.39774200  | 5.44694200  |
| H | -3.63554700 | 1.63948700  | 5.26268200  |
| H | -2.61695600 | 1.12995600  | 3.05403200  |
| H | 1.94136200  | 0.99937600  | -0.24759200 |
| H | 0.94574600  | -0.44448700 | -0.43085700 |
| H | 3.31135200  | 0.89915600  | -1.95676000 |
| H | 4.09887100  | -0.58989800 | -2.47748100 |
| H | 3.01998400  | -2.12285200 | -3.98228600 |
| H | 1.22665500  | -2.51937800 | -5.63227600 |
| H | -0.79738100 | -1.07089400 | -5.65165400 |
| H | -0.98563700 | 0.80179900  | -4.02480800 |
| H | 0.81444900  | 1.21762300  | -2.39814500 |
| H | 2.95670300  | -2.47792100 | 0.44360700  |
| H | 1.88802100  | -2.46850500 | -0.95678400 |
| H | 5.65909500  | -1.85460700 | -1.01446600 |
| H | 7.18875300  | -3.32063500 | -2.26020500 |
| H | 6.33729000  | -5.38896400 | -3.34877900 |
| H | 3.92091200  | -5.96224400 | -3.17442500 |
| H | 2.37518800  | -4.46694500 | -1.95532900 |
| C | 4.47806800  | 6.56497900  | 2.27125700  |
| H | 5.25291300  | 6.31774200  | 2.99768200  |
| C | 4.58931700  | 7.69060500  | 1.55042800  |
| H | 3.83508600  | 7.97681900  | 0.82046800  |
| H | 5.43077200  | 8.36592500  | 1.67002000  |
| C | 3.37128500  | 5.62448100  | 2.15919700  |
| H | 2.58661400  | 5.87631500  | 1.44400400  |
| C | 3.25931000  | 4.49330900  | 2.87640800  |
| H | 4.04381800  | 4.24672000  | 3.59523400  |
| C | 2.13194400  | 3.50580000  | 2.75688800  |
| H | 1.31932800  | 3.93073600  | 2.15599300  |

|   |             |             |             |
|---|-------------|-------------|-------------|
| H | 1.71525300  | 3.29474600  | 3.75287000  |
| C | 2.59169600  | 2.17277400  | 2.12688400  |
| H | 2.94729600  | 2.39672000  | 1.10965200  |
| H | 3.44356600  | 1.78336200  | 2.70281900  |
| C | 1.48261200  | 1.11844400  | 2.10761000  |
| H | 1.21685000  | 0.89614200  | 3.14385300  |
| H | 0.57637200  | 1.53053700  | 1.63111100  |
| N | 1.85132400  | -0.17566000 | 1.47422800  |
| H | 4.53145600  | 1.05122100  | 1.07423400  |
| C | 0.88388800  | -1.22509300 | 1.91971100  |
| H | -0.14798600 | -0.88769200 | 1.70593900  |
| H | 1.04781400  | -2.11303800 | 1.30473400  |
| C | 1.02024100  | -1.60419800 | 3.38005300  |
| C | 2.09621300  | -2.38729400 | 3.82334500  |
| C | 0.05806900  | -1.20359200 | 4.31710800  |
| C | 2.21587900  | -2.74964800 | 5.16464500  |
| H | 2.84140400  | -2.72961900 | 3.10895200  |
| C | 0.17123000  | -1.56597200 | 5.66213700  |
| H | -0.78924600 | -0.60676200 | 3.98728100  |
| C | 1.25233200  | -2.33744600 | 6.08930500  |
| H | 3.05425300  | -3.36071700 | 5.48775800  |
| H | -0.58520700 | -1.24569200 | 6.37336600  |
| H | 1.34188700  | -2.62244000 | 7.13371900  |
| C | 7.35979500  | 4.29810700  | -4.79192300 |
| H | 6.86179200  | 5.20538300  | -4.44948700 |
| C | 7.73571600  | 4.19671600  | -6.07517600 |
| H | 8.23872400  | 3.30966200  | -6.45396300 |
| H | 7.55797000  | 4.99635800  | -6.78743100 |
| C | 7.57537200  | 3.25996300  | -3.79334000 |
| H | 8.08081700  | 2.35552800  | -4.13675900 |
| C | 7.20425400  | 3.35442100  | -2.50555500 |
| H | 6.70385800  | 4.26259700  | -2.16456700 |
| C | 7.42061900  | 2.28836100  | -1.46823400 |
| H | 8.01220100  | 2.69543200  | -0.63389200 |
| H | 8.00654100  | 1.46490500  | -1.89682800 |
| C | 6.09236300  | 1.73732000  | -0.90577000 |
| H | 5.50394400  | 2.56957900  | -0.49175300 |
| H | 5.50970600  | 1.31356500  | -1.73041200 |
| C | 6.32654200  | 0.68661600  | 0.17963100  |
| H | 6.85264800  | -0.18493400 | -0.21762100 |
| H | 6.96193700  | 1.11014800  | 0.96794000  |
| N | 5.05691200  | 0.21306300  | 0.81151800  |
| H | 4.15903800  | -0.33463400 | 0.04430500  |
| C | 5.26370500  | -0.51360300 | 2.12784600  |
| H | 5.61683900  | 0.23506500  | 2.84698200  |
| H | 4.26532600  | -0.82907100 | 2.43824800  |
| C | 6.23495300  | -1.67107300 | 2.10078300  |
| C | 5.80122900  | -2.97795700 | 1.83975700  |
| C | 7.58861400  | -1.46576600 | 2.40997600  |
| C | 6.69684400  | -4.04788100 | 1.86220200  |
| H | 4.75337700  | -3.16767100 | 1.62577600  |
| C | 8.48828800  | -2.53154800 | 2.43108600  |
| H | 7.93939900  | -0.46631100 | 2.65636300  |
| C | 8.04370700  | -3.82609000 | 2.15383400  |
| H | 6.34029700  | -5.05323200 | 1.65843800  |
| H | 9.53107600  | -2.35296200 | 2.67695500  |
| H | 8.74075600  | -4.65871900 | 2.17797200  |

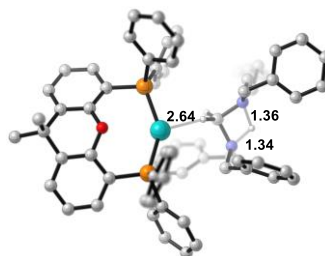

|    |             |             |             |
|----|-------------|-------------|-------------|
| Pd | 1.18391600  | 0.14984400  | 0.21420800  |
| P  | 2.81847500  | 1.37795100  | -0.87618900 |
| P  | 0.81162900  | -1.70842400 | 1.52028600  |
| O  | 3.64841200  | -1.27189600 | 0.44530500  |
| N  | -2.66775200 | 1.29197600  | -1.55045900 |
| C  | 4.22958100  | 0.25046300  | -1.32003200 |
| C  | 5.10510300  | 0.56542600  | -2.37259400 |
| C  | 6.15804800  | -0.27759800 | -2.71448900 |
| C  | 6.37035600  | -1.45458900 | -1.99713700 |
| C  | 5.54290300  | -1.80150100 | -0.92622400 |
| C  | 4.47853900  | -0.94219800 | -0.61164400 |
| C  | 5.76652200  | -3.02342800 | -0.02743400 |
| C  | 4.38671800  | -3.55235200 | 0.38088600  |
| C  | 3.38086200  | -2.61235700 | 0.65126000  |
| C  | 2.10892300  | -2.97917000 | 1.13621700  |
| C  | 1.86251600  | -4.34964900 | 1.32353200  |
| C  | 2.83461600  | -5.30365700 | 1.03455000  |
| C  | 4.08694000  | -4.90451600 | 0.56827900  |
| C  | 6.51096800  | -2.55724700 | 1.25860200  |
| C  | 6.61799600  | -4.10211900 | -0.71833700 |
| C  | 3.64039600  | 2.67649200  | 0.15332400  |
| C  | 4.70809200  | 3.46241100  | -0.31191800 |
| C  | 5.31024300  | 4.40388100  | 0.52200100  |
| C  | 4.86081200  | 4.56865000  | 1.83550700  |
| C  | 3.80723500  | 3.78777400  | 2.31138400  |
| C  | 3.19986500  | 2.84809300  | 1.47446000  |
| C  | 2.44621100  | 2.21746400  | -2.48306800 |
| C  | 2.20800400  | 1.43439000  | -3.62871800 |
| C  | 1.78683300  | 2.02242200  | -4.82133400 |
| C  | 1.57856800  | 3.40383200  | -4.89041300 |
| C  | 1.80007600  | 4.18843100  | -3.75853200 |
| C  | 2.23041100  | 3.60180700  | -2.56425300 |
| C  | -0.75158500 | -2.69865300 | 1.38887200  |
| C  | -1.15753100 | -3.11662700 | 0.10707500  |
| C  | -2.35460700 | -3.80873200 | -0.07277100 |
| C  | -3.17983200 | -4.08257400 | 1.02435100  |
| C  | -2.79399400 | -3.66213800 | 2.29804000  |
| C  | -1.58685400 | -2.97723300 | 2.48086400  |
| C  | 1.00168800  | -1.42490600 | 3.33825300  |
| C  | 1.46970400  | -2.40545500 | 4.22745300  |
| C  | 1.57697900  | -2.13041700 | 5.59194500  |
| C  | 1.21711300  | -0.87502900 | 6.08749900  |
| C  | 0.75464100  | 0.10948400  | 5.21211000  |
| C  | 0.65415400  | -0.16273600 | 3.84667500  |
| C  | -2.45957800 | 0.27366700  | -0.46525400 |
| C  | -3.29082500 | 0.75544400  | -2.81338500 |
| C  | -2.63940800 | -0.47754700 | -3.41059400 |
| C  | -1.29344000 | -0.49580200 | -3.81048500 |
| C  | -0.73669000 | -1.64843200 | -4.36497100 |
| C  | -1.51568600 | -2.79504600 | -4.54405000 |
| C  | -2.85880000 | -2.78177000 | -4.16759100 |
| C  | -3.41354700 | -1.63113400 | -3.60133900 |
| C  | -1.50151600 | 2.22810400  | -1.79253000 |
| C  | -1.58644500 | 3.52051100  | -1.01004900 |
| C  | -0.65075000 | 3.80538500  | -0.00715300 |

TS19

|   |             |             |             |
|---|-------------|-------------|-------------|
| C | -0.69440600 | 5.02232800  | 0.67941500  |
| C | -1.67267900 | 5.96697500  | 0.36730000  |
| C | -2.60794400 | 5.69388000  | -0.63617800 |
| C | -2.56288500 | 4.47946000  | -1.32152000 |
| H | 4.94322900  | 1.46979300  | -2.94947200 |
| H | 6.81593600  | -0.01773100 | -3.53853900 |
| H | 7.19763100  | -2.09876500 | -2.27313700 |
| H | 0.89138600  | -4.67202500 | 1.68494100  |
| H | 2.61962400  | -6.35840500 | 1.17834300  |
| H | 4.83699400  | -5.65897500 | 0.35900300  |
| H | 7.49287400  | -2.14608000 | 0.99900200  |
| H | 6.65714700  | -3.40406800 | 1.93847400  |
| H | 5.94752800  | -1.78487700 | 1.79068700  |
| H | 6.14517800  | -4.47460500 | -1.63341500 |
| H | 6.78856800  | -4.94868000 | -0.04697300 |
| H | 7.60619500  | -3.70969300 | -0.97471000 |
| H | 5.07338000  | 3.34250800  | -1.32746800 |
| H | 6.13400900  | 5.00591900  | 0.14848300  |
| H | 5.33535500  | 5.29940900  | 2.48456400  |
| H | 3.46120100  | 3.90327800  | 3.33508000  |
| H | 2.38910300  | 2.22454100  | 1.84444800  |
| H | 2.37077600  | 0.36030800  | -3.59027700 |
| H | 1.62880600  | 1.40319600  | -5.70067000 |
| H | 1.25515200  | 3.86230100  | -5.82071900 |
| H | 1.64810500  | 5.26356800  | -3.80149100 |
| H | 2.40511500  | 4.23085400  | -1.69733700 |
| H | -0.52706700 | -2.90337100 | -0.75325500 |
| H | -2.64163600 | -4.13382200 | -1.06919000 |
| H | -4.10884800 | -4.62940200 | 0.88680600  |
| H | -3.42158800 | -3.88077300 | 3.15815900  |
| H | -1.29150100 | -2.67552000 | 3.48092500  |
| H | 1.76040300  | -3.38329600 | 3.85605300  |
| H | 1.94590100  | -2.89712800 | 6.26768200  |
| H | 1.30543200  | -0.66308400 | 7.14940300  |
| H | 0.48507500  | 1.09232300  | 5.58971700  |
| H | 0.32308000  | 0.61112900  | 3.15815500  |
| H | -2.68742800 | -0.73666100 | -0.79887200 |
| H | -1.44166400 | 0.30798000  | -0.05916100 |
| H | -4.33596700 | 0.53361700  | -2.58529000 |
| H | -3.29399100 | 1.58984900  | -3.52083200 |
| H | -0.67050100 | 0.38666600  | -3.70219300 |
| H | 0.30632600  | -1.64694000 | -4.66873100 |
| H | -1.07973900 | -3.68738100 | -4.98387300 |
| H | -3.47877700 | -3.66111200 | -4.31758100 |
| H | -4.46445800 | -1.63004000 | -3.32102100 |
| H | -0.57332500 | 1.69631200  | -1.55860100 |
| H | -1.49224200 | 2.45216300  | -2.86159500 |
| H | 0.12074700  | 3.07364400  | 0.22550200  |
| H | 0.04302700  | 5.23206600  | 1.44909200  |
| H | -1.70334600 | 6.91575400  | 0.89522900  |
| H | -3.36188200 | 6.43249700  | -0.89390200 |
| H | -3.28054500 | 4.28408000  | -2.11598100 |
| C | -8.56079300 | -3.49693300 | -2.57090700 |
| H | -9.10327500 | -2.68693200 | -3.05879000 |
| C | -8.72263700 | -4.75472300 | -3.00712400 |
| H | -8.20395000 | -5.59081500 | -2.54293400 |
| H | -9.38231800 | -4.99157100 | -3.83596500 |
| C | -7.69438000 | -3.12187200 | -1.46162700 |
| H | -7.15808700 | -3.93574500 | -0.96994400 |
| C | -7.53160600 | -1.86564000 | -1.01253900 |
| H | -8.07738400 | -1.05639700 | -1.50137500 |
| C | -6.63638100 | -1.46832900 | 0.12789000  |
| H | -6.22243400 | -2.36451200 | 0.60740100  |
| H | -7.22078400 | -0.93856200 | 0.89506000  |

|   |             |             |             |
|---|-------------|-------------|-------------|
| C | -5.47892200 | -0.55466400 | -0.33116000 |
| H | -4.89564300 | -1.09833400 | -1.08200000 |
| H | -5.89340400 | 0.33879600  | -0.81849800 |
| C | -4.59702000 | -0.13432100 | 0.84206700  |
| H | -5.20644300 | 0.37933500  | 1.58857600  |
| H | -4.15381000 | -1.01625300 | 1.32429900  |
| N | -3.49096300 | 0.80819900  | 0.49105500  |
| H | -3.54544400 | 1.62518400  | -0.59172700 |
| C | -2.87256100 | 1.40577300  | 1.72912400  |
| H | -2.45011800 | 0.58590600  | 2.32249200  |
| H | -2.04538900 | 2.03363100  | 1.38861100  |
| C | -3.84213300 | 2.21530100  | 2.55857500  |
| C | -4.34078400 | 3.43774900  | 2.08538300  |
| C | -4.23167100 | 1.76944400  | 3.82857800  |
| C | -5.21977700 | 4.19032900  | 2.86360000  |
| H | -4.03142600 | 3.80934500  | 1.11197300  |
| C | -5.10724100 | 2.52540200  | 4.61094500  |
| H | -3.84275100 | 0.82819600  | 4.21085000  |
| C | -5.60553300 | 3.73592300  | 4.12765500  |
| H | -5.59721400 | 5.13718300  | 2.48768800  |
| H | -5.39732200 | 2.16882500  | 5.59510000  |
| H | -6.28659300 | 4.32598800  | 4.73417200  |

### TS20

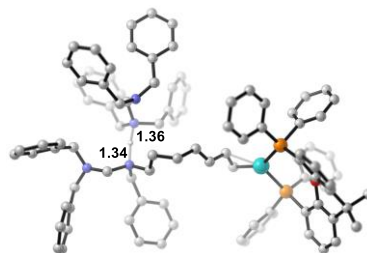

|   |              |            |             |
|---|--------------|------------|-------------|
| N | -6.13342500  | 2.55696100 | -0.04616600 |
| C | -4.86256900  | 2.41256700 | -0.68547800 |
| C | -7.15811500  | 1.52299700 | -0.27572800 |
| C | -8.07858500  | 1.70080400 | -1.47475900 |
| C | -9.33104600  | 2.31072600 | -1.32065900 |
| C | -10.17316600 | 2.50742000 | -2.41645800 |
| C | -9.77709800  | 2.08549900 | -3.68662800 |
| C | -8.54013800  | 1.45826500 | -3.85286800 |
| C | -7.70124500  | 1.26506100 | -2.75439500 |
| C | -6.62292800  | 3.89541200 | 0.31612200  |
| C | -6.54468300  | 5.01792800 | -0.71681900 |
| C | -6.63378900  | 4.80676400 | -2.09841300 |
| C | -6.60687400  | 5.88556700 | -2.98549400 |
| C | -6.49892800  | 7.19217000 | -2.50742500 |
| C | -6.41299800  | 7.41544900 | -1.13179100 |
| C | -6.42908700  | 6.33583200 | -0.24802400 |
| H | -4.92523500  | 1.74100300 | -1.54470600 |
| H | -4.50214000  | 3.37929600 | -1.05203000 |
| H | -6.63217800  | 0.56650700 | -0.35767300 |
| H | -7.77304700  | 1.46078400 | 0.63108100  |
| H | -9.65619400  | 2.62929400 | -0.33246900 |
| H | -11.13942500 | 2.98367400 | -2.27653500 |
| H | -10.43261500 | 2.23318100 | -4.54001300 |
| H | -8.23370900  | 1.10863300 | -4.83480700 |
| H | -6.75014000  | 0.75785100 | -2.89789800 |
| H | -7.67020500  | 3.76498300 | 0.61146600  |
| H | -6.11257100  | 4.24546200 | 1.22449900  |
| H | -6.73644800  | 3.79966500 | -2.48806200 |
| H | -6.67657400  | 5.70130500 | -4.05410800 |
| H | -6.48072900  | 8.02890200 | -3.19989100 |
| H | -6.32949300  | 8.42777900 | -0.74606300 |

|    |             |             |             |   |             |             |             |
|----|-------------|-------------|-------------|---|-------------|-------------|-------------|
| H  | -6.35880000 | 6.51964400  | 0.82262000  | C | 4.71921500  | 4.12229000  | 4.15202600  |
| C  | 1.62958400  | -0.15445700 | 0.56867200  | C | 5.24860500  | 2.99540400  | 3.51407700  |
| H  | 1.41607600  | -1.20344000 | 0.77400500  | C | 3.31569500  | -2.31221300 | -2.46909500 |
| C  | 2.25367400  | 0.63064700  | 1.56599300  | C | 2.43976000  | -1.48193200 | -3.18897500 |
| H  | 2.12090100  | 1.71189600  | 1.56851000  | C | 1.45809200  | -2.02729100 | -4.01676500 |
| H  | 2.45340200  | 0.20223300  | 2.54711000  | C | 1.31319000  | -3.41359600 | -4.11520900 |
| C  | 0.82936400  | 0.46398100  | -0.48587000 | C | 2.16153800  | -4.24804100 | -3.38610000 |
| H  | 1.00370900  | 1.53199900  | -0.64001600 | C | 3.16102300  | -3.70276100 | -2.57531100 |
| C  | -0.10977100 | -0.14113300 | -1.24038200 | C | 5.42235400  | -2.94149700 | -0.59138800 |
| H  | -0.28696600 | -1.21033000 | -1.10800500 | C | 6.50251000  | -3.64852800 | -1.14018900 |
| C  | -0.98206200 | 0.55817600  | -2.24851900 | C | 7.05371900  | -4.73987900 | -0.46475700 |
| H  | -1.02104200 | -0.01807100 | -3.18301600 | C | 6.52887400  | -5.14553000 | 0.76333800  |
| H  | -0.55351900 | 1.53678800  | -2.50532500 | C | 5.45092200  | -4.45163900 | 1.31719600  |
| C  | -2.44009800 | 0.75628500  | -1.75191500 | C | 4.90684900  | -3.35494100 | 0.64797100  |
| H  | -3.06188100 | 1.09093700  | -2.59181100 | H | 7.14046800  | 3.93134100  | 1.33119000  |
| H  | -2.83424800 | -0.20732300 | -1.41195000 | H | 8.89826800  | 4.90058000  | -0.10427200 |
| C  | -2.47377400 | 1.77074900  | -0.60863500 | H | 9.79253700  | 3.63179400  | -2.01831300 |
| H  | -1.67188600 | 1.52637800  | 0.09166600  | H | 4.92555400  | -2.08244400 | -4.39782500 |
| H  | -2.25957300 | 2.77546400  | -0.99121500 | H | 6.58263500  | -1.34284000 | -6.06881100 |
| N  | -3.74761400 | 1.83183800  | 0.18994900  | H | 8.47399300  | 0.09259300  | -5.40840100 |
| C  | -3.53343100 | 2.67019500  | 1.44096500  | H | 10.98774100 | 0.56885800  | -1.75069000 |
| H  | -4.52988700 | 2.94613700  | 1.78818600  | H | 10.52520600 | -0.67268300 | -2.93779900 |
| H  | -3.11224900 | 1.99833400  | 2.19153100  | H | 9.69620100  | -0.58711700 | -1.37106200 |
| C  | -2.61890300 | 3.87686000  | 1.33437100  | H | 9.11162000  | 2.50959300  | -4.37770200 |
| C  | -1.31142100 | 3.78885900  | 1.83654600  | H | 10.19430100 | 1.13355000  | -4.67599400 |
| C  | -3.04006300 | 5.09528900  | 0.78149700  | H | 10.65074000 | 2.35490600  | -3.50499300 |
| C  | -0.44228100 | 4.87902200  | 1.78017000  | H | 8.43616100  | 1.40573400  | 2.37057500  |
| H  | -0.96623600 | 2.85883500  | 2.28324900  | H | 9.55372500  | 0.09099800  | 4.13552600  |
| C  | -2.17169000 | 6.18626500  | 0.71807100  | H | 8.32814200  | -1.72677300 | 5.30906300  |
| H  | -4.04945800 | 5.20995400  | 0.40058100  | H | 5.97238700  | -2.22808900 | 4.68687300  |
| C  | -0.87153400 | 6.08168600  | 1.21581100  | H | 4.86008100  | -0.92573400 | 2.89172900  |
| H  | 0.56494300  | 4.78606100  | 2.17699800  | H | 4.05138700  | 3.54937400  | 0.37964800  |
| H  | -2.51835600 | 7.12048200  | 0.28544600  | H | 3.16298600  | 5.56770800  | 1.49534400  |
| H  | -0.20040900 | 6.93475500  | 1.17061900  | H | 3.57067600  | 5.93390200  | 3.92789300  |
| H  | -4.00678600 | 0.57950600  | 0.64815600  | H | 4.90645000  | 4.27547600  | 5.21163800  |
| Pd | 3.82632500  | 0.06761000  | 0.22873200  | H | 5.84602700  | 2.29170500  | 4.08480700  |
| P  | 5.64572900  | 1.29461300  | 1.22056000  | H | 2.53127400  | -0.40295900 | -3.10151400 |
| P  | 4.62088700  | -1.49729800 | -1.43137500 | H | 0.80531900  | -1.36823300 | -4.58373800 |
| O  | 7.08351800  | 0.10137900  | -1.07681600 | H | 0.54757600  | -3.83983100 | -4.75842200 |
| C  | 7.01906700  | 2.07188200  | 0.24280600  | H | 2.05914700  | -5.32784900 | -3.45819200 |
| C  | 7.52974300  | 3.35449000  | 0.49953200  | H | 3.82785500  | -4.36573800 | -2.03380700 |
| C  | 8.51937900  | 3.90437300  | -0.31381900 | H | 6.91688700  | -3.34964500 | -2.09792700 |
| C  | 9.02552600  | 3.18311400  | -1.39637100 | H | 7.89391700  | -5.27334500 | -0.90133300 |
| C  | 8.56355600  | 1.89386100  | -1.67683200 | H | 6.95966300  | -5.99444300 | 1.28733300  |
| C  | 7.56825100  | 1.37161600  | -0.84079200 | H | 5.03977900  | -4.75770400 | 2.27572800  |
| C  | 9.10615300  | 0.99104000  | -2.79188400 | H | 4.07985500  | -2.80406300 | 1.08918700  |
| C  | 7.92325200  | 0.17219800  | -3.32506700 | C | -4.76963800 | -1.74557000 | 0.66066200  |
| C  | 6.96238300  | -0.26138000 | -2.40325800 | H | -5.82107700 | -1.47288700 | 0.55967400  |
| C  | 5.86207200  | -1.06102600 | -2.74457700 | N | -4.21396000 | -2.10025600 | -0.60933100 |
| C  | 5.75297800  | -1.45475600 | -4.08728100 | C | -4.95693300 | -1.70654700 | -1.82284100 |
| C  | 6.68806300  | -1.03458500 | -5.03255300 | H | -5.34882900 | -0.70012900 | -1.64470200 |
| C  | 7.75919500  | -0.22320800 | -4.65614400 | C | -3.35207500 | -3.28423700 | -0.72452200 |
| C  | 10.14332900 | 0.01073300  | -2.17083000 | H | -2.36331200 | -3.06402400 | -0.29805000 |
| C  | 9.79679600  | 1.79880100  | -3.90354100 | H | -3.16907400 | -3.42114900 | -1.79657900 |
| C  | 6.56093500  | 0.34082000  | 2.51585200  | H | -4.72612700 | -2.58326200 | 1.36037700  |
| C  | 7.89044600  | 0.61343700  | 2.87354400  | N | -4.11169400 | -0.55315000 | 1.36577300  |
| C  | 8.52238700  | -0.12905600 | 3.87292000  | C | -4.97099800 | -0.08300600 | 2.53929800  |
| C  | 7.83410200  | -1.14943400 | 4.53225600  | H | -4.28494300 | 0.34218600  | 3.27434000  |
| C  | 6.51137000  | -1.42947300 | 4.18386100  | H | -5.57342700 | 0.73951300  | 2.14020800  |
| C  | 5.88212900  | -0.69415600 | 3.17858700  | C | -2.66564000 | -0.83393200 | 1.72655000  |
| C  | 5.02150200  | 2.77597600  | 2.14855000  | H | -2.18379000 | 0.13894800  | 1.84139100  |
| C  | 4.24747100  | 3.71047100  | 1.43745400  | H | -2.22791000 | -1.28125600 | 0.83288600  |
| C  | 3.73738400  | 4.84422200  | 2.06895100  | C | -5.90737000 | -1.06574200 | 3.22631700  |
| C  | 3.96877700  | 5.05212300  | 3.43292200  | C | -5.49653300 | -1.84799300 | 4.31552400  |



|   |             |             |             |
|---|-------------|-------------|-------------|
| C | -7.25122800 | -1.13508000 | 2.82614600  |
| C | -6.39833500 | -2.69391000 | 4.96324000  |
| H | -4.47379700 | -1.79045500 | 4.67007600  |
| C | -8.15362700 | -1.98166300 | 3.46974300  |
| H | -7.60144300 | -0.50727700 | 2.00975100  |
| C | -7.72620500 | -2.76925300 | 4.54000200  |
| H | -6.06099500 | -3.28952600 | 5.80670900  |
| H | -9.18930700 | -2.01677300 | 3.14362600  |
| H | -8.42583500 | -3.42646400 | 5.04843700  |
| C | -2.36460600 | -1.65096900 | 2.96526600  |
| C | -1.93285900 | -0.99275200 | 4.12775800  |
| C | -2.44786100 | -3.05108700 | 2.98419700  |
| C | -1.62088800 | -1.70638500 | 5.28644000  |
| H | -1.82447600 | 0.08984200  | 4.12452800  |
| C | -2.14075700 | -3.76729400 | 4.14157100  |
| C | -1.73132700 | -3.09821900 | 5.29726400  |
| H | -1.28524600 | -1.17673300 | 6.17345400  |
| H | -1.48692000 | -3.65811800 | 6.19548000  |
| H | -4.22691700 | -1.60774200 | -2.63479100 |
| C | -3.81922900 | -4.61497000 | -0.13463100 |
| C | -2.83589900 | -5.56272100 | 0.19193900  |
| C | -5.16321000 | -4.95442400 | 0.05996000  |
| C | -3.18419800 | -6.81893600 | 0.68814200  |
| H | -1.78523500 | -5.31544800 | 0.04965600  |
| C | -5.51358800 | -6.20828300 | 0.56782900  |
| H | -5.94474500 | -4.24660100 | -0.19317500 |
| C | -4.52869300 | -7.14507900 | 0.88104400  |
| H | -2.40675600 | -7.53941200 | 0.92739400  |
| H | -6.56255800 | -6.45182900 | 0.71260500  |
| H | -4.80454300 | -8.12004700 | 1.27277200  |
| C | -6.08515700 | -2.61627100 | -2.28484600 |
| C | -7.39028800 | -2.46626000 | -1.79224200 |
| C | -5.83842300 | -3.62957100 | -3.22159200 |
| C | -8.41306400 | -3.32407000 | -2.20069100 |
| H | -7.61925000 | -1.66320000 | -1.09554600 |
| C | -6.85744100 | -4.48937600 | -3.63334700 |
| H | -4.84030600 | -3.74508000 | -3.63847800 |
| C | -8.14692000 | -4.34209600 | -3.11880900 |
| H | -9.41879800 | -3.18932200 | -1.81236600 |
| H | -6.64577000 | -5.26956000 | -4.35903300 |
| H | -8.94246700 | -5.00787700 | -3.44092800 |
| H | -2.74959600 | -3.59783600 | 2.09736400  |
| H | -2.21528100 | -4.85092900 | 4.13391700  |
